# Supplementary material for: MicroRNA-203 represses selection and expansion of oncogenic Hras transformed tumor initiating cells
Source: eLife. 2015 Jul 23;4:e07004. doi: 10.7554/eLife.07004 (PMC4536367; doi:10.7554/eLife.07004)
Supplement: Figure 1—source data 1. — DOI: http://dx.doi.org/10.7554/eLife.07004.004 [file elife07004s001.xlsx]

## Sheet: Sheet1
Symbol	logFC	logCPM	PValue	FDR
Ncmap	9.38811	1.89346	1.9109e-11	7.0358e-10
Padi1	9.28149	4.03711	1.03155e-42	3.79808e-40
Mmp9	8.92383	1.44559	3.1454e-09	8.77869e-08
Pdyn	8.84811	3.60781	1.85009e-27	2.64341e-25
Apbb1ip	8.83888	1.36797	2.23756e-09	6.31862e-08
Pcsk9	8.40842	0.958946	9.01617e-07	1.70577e-05
Crispld2	8.39024	0.942271	1.01415e-06	1.90362e-05
Adam12	8.23213	0.806604	2.00289e-07	4.17728e-06
Cldn7	7.9687	6.11678	7.03546e-45	2.92828e-42
Add2	7.96786	0.579603	1.09334e-05	0.000162777
Zfpm2	7.89645	0.496688	6.43088e-06	0.000103293
Rnf183	7.86802	0.482537	2.75638e-06	4.67023e-05
Car2	7.85607	0.47671	6.35171e-06	0.000102193
Mcpt8	7.85511	0.466257	2.5893e-06	4.41843e-05
Krt8	7.75696	7.35489	1.92301e-32	4.09089e-30
Rab17	7.68033	2.46546	4.68939e-13	2.11753e-11
Nup62cl	7.58973	0.22672	2.91118e-05	0.000382813
Ccbe1	7.58349	0.223991	1.84052e-05	0.000260255
Scnn1g	7.50549	0.16277	1.67933e-05	0.000239587
Slfn2	7.42996	0.102003	2.57905e-05	0.00034676
Mmp1b	7.37334	0.0483506	3.51848e-05	0.000454553
Calcb	7.33545	2.95626	1.3577e-08	3.47519e-07
Ptpn22	7.32158	3.46259	8.03572e-28	1.18348e-25
Hsd11b1	7.31074	2.10346	1.47273e-11	5.46453e-10
Krt18	7.30715	8.21099	2.14294e-71	5.21336e-68
Ksr1	7.24417	3.76681	2.75389e-32	5.73108e-30
Ctla2a	7.22034	5.66438	1.64709e-52	1.97095e-49
Gm13770	7.14374	-0.144584	9.70639e-05	0.00109704
Spry4	7.13844	-0.146606	8.68604e-05	0.000998216
Nrros	7.05734	-0.215421	0.00014137	0.00152575
Postn	7.02524	1.82943	5.77446e-10	1.75488e-08
Cep97	7.01942	-0.249576	0.000219616	0.00223896
Arhgef15	6.96246	-0.290938	0.000183634	0.00192123
Zfp608	6.90351	-0.333372	0.000205725	0.0021131
Pyhin1	6.82602	3.65517	9.94621e-24	1.06983e-21
Artn,St3gal3	6.75187	-0.454617	0.000347394	0.00335155
Kcnn4	6.68298	7.14422	1.65378e-69	3.16633e-66
Csf3	6.57549	5.92461	5.35595e-81	2.56363e-77
Asun	6.51704	-0.635262	0.000748846	0.00651108
Slc6a14	6.44562	1.2872	3.96626e-08	9.46858e-07
Ppbp	6.43805	11.4841	2.17836e-71	5.21336e-68
Lcn2	6.43671	2.08761	1.43059e-10	4.81252e-09
Spp1	6.41686	2.06445	1.04259e-10	3.57731e-09
Cgnl1	6.22174	2.77511	1.06219e-15	5.98137e-14
Msln	6.21281	6.6934	6.52217e-53	1.04061e-49
AA467197	6.03232	3.68779	8.60066e-25	1.00407e-22
Prss22	6.02766	4.65631	8.39565e-41	2.67905e-38
Snai3	5.96565	3.77866	4.12545e-24	4.64623e-22
Gng13	5.8509	0.756735	1.2699e-05	0.000186168
Fxyd5	5.61787	5.11719	1.47877e-51	1.28693e-48
Krt19	5.55286	6.04944	3.86084e-52	4.10664e-49
Bcl2l15	5.38128	7.32657	7.50283e-23	7.48173e-21
Phgr1	5.37307	2.50442	8.06549e-12	3.08844e-10
Cxcl2	5.36826	5.47342	4.42467e-45	2.01702e-42
Itga2	5.33125	5.73812	9.85055e-51	7.85827e-48
Tnfaip2	5.27919	5.20601	7.88817e-41	2.60391e-38
Hmga2	5.2199	9.57409	1.69773e-101	1.62524e-97
Gchfr	5.19058	3.02344	5.94768e-16	3.53647e-14
Sorcs2	5.16961	0.15688	0.00013843	0.00150078
Parvb	5.13044	4.75918	3.9939e-18	2.89648e-16
Gpr50	5.07961	4.19965	3.44819e-25	4.07525e-23
Wnt5a	4.92071	1.82514	8.81014e-08	1.98914e-06
Upp1	4.82508	5.12953	2.1121e-46	1.06417e-43
Dagla	4.80941	1.71993	8.09203e-07	1.54313e-05
Akap12	4.80218	5.93257	4.74536e-18	3.3901e-16
Slc28a3	4.76648	-0.178036	0.000873911	0.00741645
Nrk	4.74467	2.10159	2.61804e-06	4.45953e-05
Rap1gap2	4.67937	1.30932	1.01181e-05	0.000152297
Jam2	4.63006	4.28064	9.27525e-19	7.10335e-17
Abcc3	4.58084	2.15241	6.69039e-07	1.28867e-05
Arg1	4.5635	5.5825	5.36245e-46	2.56674e-43
Tmem74	4.56255	0.372727	0.000183587	0.00192123
Has3	4.5512	0.367533	0.000174924	0.00184624
Ubash3b	4.51187	0.808287	2.28375e-05	0.000312766
Lysmd3	4.5069	-0.375196	0.00180969	0.0137931
Tmprss11e	4.50585	5.6716	1.91432e-48	1.07799e-45
Zfp618	4.46657	0.297218	0.000199453	0.00205751
Epcam	4.44944	5.15011	6.55948e-32	1.28151e-29
Cxcl3	4.42959	5.53414	1.11003e-34	2.79641e-32
Sema7a	4.38822	3.54046	3.59447e-18	2.64691e-16
Bcl2l11	4.33994	1.9284	1.26199e-06	2.30114e-05
Moxd1	4.33868	4.78897	4.11281e-35	1.06411e-32
Wfdc2	4.31677	6.78384	4.36062e-29	7.87626e-27
Cxcl5,Ppbp	4.29608	0.986534	4.7639e-05	0.000600063
Gm11714	4.25858	0.596448	0.000177107	0.00186517
Coro6	4.25732	0.604719	0.000297426	0.00292627
Tmem179	4.23207	0.918624	9.29108e-05	0.00105759
Zfp74	4.1891	0.878765	4.79824e-05	0.000603595
Sall2	4.18598	2.19662	2.22586e-05	0.000306151
Dusp4	4.16555	4.7315	1.12151e-28	1.88354e-26
Slc4a11	4.13395	5.46236	1.19603e-36	3.46958e-34
Rrad	4.106	2.46852	2.50929e-09	7.04441e-08
Syt7	4.05306	1.65581	3.319e-06	5.56442e-05
Mtcl1	4.02582	0.380201	0.00175974	0.0135092
Kif1a	4.01203	1.44576	2.63041e-05	0.000351199
Tmem173	3.99171	0.721001	0.000200351	0.00206455
Angptl4	3.96556	3.81342	3.00345e-16	1.86702e-14
Entpd3	3.94107	2.88855	3.58971e-08	8.59108e-07
Crlf1	3.93108	4.00565	7.11912e-16	4.15557e-14
Ecm1	3.91015	9.07765	1.41911e-35	3.88147e-33
Gm14137	3.90513	3.48357	5.64621e-16	3.3782e-14
Tctn1	3.88144	0.270388	0.00107916	0.0088982
Zdbf2	3.87011	1.11111	0.000216675	0.00221133
Mmd	3.86436	4.38884	1.72527e-26	2.26247e-24
Gne	3.85153	4.9832	1.18426e-34	2.9069e-32
Ptpn18	3.84886	1.48693	3.97828e-05	0.000509827
Ddah1	3.82605	2.46829	6.79892e-06	0.000108658
D930048N14Rik	3.82592	-0.219279	0.00309356	0.0213824
Cldn3	3.81879	6.97125	5.47535e-29	9.53009e-27
Liph	3.75829	2.16514	5.70026e-05	0.000697809
Cers2	3.7472	5.62867	1.55586e-23	1.65491e-21
Gm24298	3.74298	3.14624	2.72667e-10	8.67189e-09
Clcf1	3.74144	2.6368	9.71343e-08	2.16248e-06
Il1a	3.73111	7.38444	1.69241e-49	1.0801e-46
Pced1b	3.71801	-0.296969	0.00417831	0.0271732
3110070M22Rik	3.70688	-0.298671	0.00434961	0.0280585
Gm13032	3.67532	-0.330583	0.00427431	0.0277034
Itgb7	3.64395	3.93955	4.5037e-18	3.24165e-16
Cdkn1c	3.63258	5.47326	4.07917e-32	8.1354e-30
Cxcl1	3.62648	6.86947	9.09059e-47	4.83468e-44
Oaf	3.62331	3.97774	7.3402e-18	5.12903e-16
Ankrd1	3.59343	0.382794	0.00261304	0.0186407
Padi2	3.58151	1.97083	0.00494957	0.0313168
Serpine1	3.57519	1.78401	1.73364e-05	0.000246233
S100a7a	3.56346	6.55511	5.25136e-43	2.09464e-40
Igfbp7	3.56245	7.64249	5.75784e-19	4.55535e-17
Tm4sf1	3.55519	2.24418	8.15787e-06	0.000127191
Krt7	3.54035	8.04402	2.08642e-27	2.93726e-25
Serpinf1	3.51218	2.61182	8.8909e-08	2.00265e-06
Gpsm1	3.47302	4.51336	7.68825e-23	7.58759e-21
Tie1	3.47278	0.564349	0.00113614	0.00927216
Srgap3	3.46987	1.97768	0.000875689	0.00741856
Dynap	3.45606	7.86215	1.39133e-16	8.87946e-15
Fam213a	3.42693	4.64395	6.04154e-16	3.5701e-14
Cd97	3.41279	2.52	7.79895e-06	0.000122192
Etv5	3.40831	2.25687	2.56667e-06	4.38762e-05
Syt17	3.38986	2.62618	2.02704e-08	5.02717e-07
Pdpn	3.38503	5.05996	3.72727e-07	7.4491e-06
Fbln2	3.37912	1.72198	0.000154411	0.00165344
Dusp9	3.36114	4.95667	4.83347e-24	5.38032e-22
Ifitm3	3.3519	8.11589	2.4533e-18	1.82058e-16
Clec2f	3.31552	2.24176	6.66041e-06	0.000106622
Cldn23	3.30472	1.42923	7.11794e-05	0.000842275
Aldh1a3	3.30445	4.96314	7.5424e-27	1.01695e-24
Mlkl	3.28493	4.03056	4.26276e-14	2.12539e-12
Rassf8	3.28237	3.45582	1.74586e-08	4.38663e-07
2010107G12Rik	3.27615	-0.18619	0.00788093	0.0458627
Ackr3	3.24056	3.91126	4.83569e-11	1.70191e-09
Elf3	3.23758	5.56354	1.21899e-14	6.30777e-13
Pfkfb4	3.23726	3.5771	6.41207e-12	2.49523e-10
Tnnc1	3.22806	0.346038	0.00556031	0.0345642
Tnfaip8l1	3.2198	3.58441	2.08799e-12	8.65296e-11
5830416P10Rik	3.2129	2.62883	1.74165e-06	3.07617e-05
Timp1	3.19953	5.16557	4.38805e-08	1.03465e-06
Rapgef5	3.19935	0.769252	0.00621327	0.0379093
Ttc9	3.19586	2.61827	1.30984e-06	2.37484e-05
Slco4a1	3.18458	1.05664	0.00141533	0.0112067
Apobr	3.17542	1.90616	4.0994e-05	0.000523946
Igfbp3	3.17325	5.14917	2.63596e-24	3.00406e-22
Hbegf	3.16407	6.36017	6.82472e-26	8.37604e-24
Plaur	3.13147	6.79318	4.22837e-39	1.30575e-36
Lat2	3.10285	1.24426	0.00381512	0.025205
Procr	3.1005	5.89306	2.45933e-30	4.70864e-28
Sfrp1	3.09364	0.821917	0.0045217	0.028954
Psca	3.08812	8.17402	5.07524e-18	3.59891e-16
Pxdn	3.08763	4.99936	3.56851e-12	1.41748e-10
Prkg2	3.05515	5.1054	2.58369e-15	1.40763e-13
Ephx2	3.03926	1.1909	0.00482512	0.0306305
Klra4	3.02687	5.99079	1.8303e-07	3.84243e-06
Arl4c	3.02224	4.04535	1.98131e-11	7.26708e-10
Trf	3.02079	3.13658	0.00294785	0.0205833
Cpxm2	3.01874	0.408878	0.00849351	0.0488215
Lamb1	3.01157	4.95658	4.3852e-10	1.34982e-08
Rnf24	2.98184	2.14939	2.67377e-05	0.0003555
Tnnt2	2.95619	8.33016	4.59316e-22	4.18765e-20
Nrp2	2.95257	2.54691	4.18178e-06	6.89022e-05
Gipc2	2.95172	4.11475	9.41099e-13	4.03997e-11
Ptgs1	2.94435	2.94969	9.12556e-06	0.000139107
Tmc4	2.94233	1.97768	0.00185507	0.0140606
Prss16	2.92652	3.7452	1.0582e-11	3.98824e-10
Nid1	2.89207	6.03168	5.1534e-29	9.13582e-27
4833407H14Rik	2.88219	2.07725	0.000829882	0.00711232
Cystm1	2.88022	5.9629	4.8261e-19	3.85002e-17
M1ap	2.87938	3.19249	1.97062e-05	0.000276204
C3	2.87477	3.41158	8.54534e-07	1.62311e-05
Socs3	2.87383	1.71466	0.00348218	0.0234588
Acvrl1	2.86151	2.26996	1.79346e-05	0.000253976
Plac8	2.85316	5.75511	9.1632e-23	8.94645e-21
Fcrl1	2.83618	2.33782	0.00202891	0.0151385
Sowaha	2.83081	2.34394	1.70165e-05	0.000242049
Rnf213	2.81988	4.81907	8.71725e-16	5.02712e-14
Mtss1l	2.81725	1.00765	0.00558837	0.034716
Irf1	2.81679	2.46453	0.000158009	0.00168631
Sprr2f	2.81596	1.35265	0.00655185	0.0395715
Il34	2.81075	4.77178	3.98356e-21	3.46678e-19
U90926	2.80262	2.31384	9.1031e-05	0.00103743
Fscn1	2.79423	7.13571	3.9705e-32	8.08714e-30
Atp1b1	2.76305	1.20361	0.00182565	0.0139037
Cxcl5	2.76208	10.0681	4.94204e-28	7.63068e-26
Hmga1	2.75581	10.5377	3.24669e-28	5.18009e-26
Hmga1-rs1	2.75581	9.53782	2.86814e-28	4.65367e-26
Mapk11	2.74654	2.52986	8.36655e-06	0.000129578
Specc1	2.74394	4.52157	7.36964e-13	3.25113e-11
Plet1	2.73618	9.16032	2.51984e-35	6.70069e-33
Zdhhc17	2.73442	0.549378	0.00468889	0.0298449
Noxo1	2.7305	0.95421	0.00183485	0.0139515
Lgals1	2.72773	8.70712	4.58249e-08	1.07257e-06
Flot2	2.71448	6.09616	4.83744e-23	4.97945e-21
Sema6d	2.70348	0.812703	0.00345001	0.0233258
Tbc1d1	2.68356	4.61276	2.22304e-16	1.40008e-14
Farp1	2.67681	4.95369	1.01502e-15	5.74958e-14
Rdh5	2.67515	1.01401	0.00431674	0.0279383
Havcr2	2.64123	3.37203	1.03682e-06	1.93852e-05
Shisa4	2.64007	1.27908	0.0035778	0.0239345
Adamtsl4	2.63563	4.19936	6.88608e-10	2.08609e-08
Sigirr	2.62802	2.46898	5.01571e-05	0.000626833
Glis2	2.62084	2.21334	8.01327e-05	0.0009355
Abcb9	2.61929	2.9957	0.000479798	0.00440374
9430020K01Rik	2.61821	3.87453	1.39717e-09	4.04083e-08
Epha2	2.61199	4.86138	2.26299e-14	1.15232e-12
Tmem170	2.61053	1.17248	0.00367936	0.024482
Antxr2	2.60546	4.04086	6.95689e-10	2.09429e-08
Pcolce2	2.60182	2.65142	0.00208767	0.0155165
B4galt2	2.60164	1.42867	0.00160009	0.0124332
Gprc5a	2.59191	7.70316	5.17615e-28	7.86528e-26
Rai14	2.59104	4.52944	4.91396e-17	3.26676e-15
Osbpl7	2.57453	1.9334	0.00113565	0.00927216
Fgd6	2.56132	2.49393	1.64685e-05	0.000235654
Snx30	2.55946	2.9687	0.000150353	0.0016118
Bfsp1	2.55652	2.71797	0.000335066	0.00324984
Dennd2d	2.55032	1.84786	0.000513639	0.00465631
Wnt7a	2.5419	5.12923	1.14851e-17	7.79767e-16
Ramp3	2.53831	3.69808	3.82033e-07	7.61917e-06
Bace1	2.53699	2.27548	0.000297901	0.00292793
Asap2	2.53502	2.22056	0.00173459	0.0133483
Ovol2	2.53259	2.22965	0.000382813	0.00362838
Stk39	2.50381	3.87924	1.73369e-10	5.70332e-09
Myo1b	2.5018	3.8268	1.22327e-09	3.57025e-08
Gpr137b-ps	2.45529	4.78873	9.71098e-16	5.53352e-14
Itga3	2.44885	9.45842	8.39719e-29	1.43547e-26
Ctsz	2.43872	5.44321	5.20078e-13	2.33742e-11
Rgl3	2.42585	2.2262	0.000210435	0.0021566
Lrrn4cl	2.39052	4.4507	6.67733e-11	2.32444e-09
Arhgef16	2.37917	3.97087	3.38564e-10	1.06265e-08
Sgms2	2.37734	1.53453	0.00309637	0.0213864
Uchl1	2.36957	2.33739	0.000651719	0.00577142
Abcd1	2.34761	1.83535	0.0087067	0.049731
4931428F04Rik	2.3468	2.16084	0.000550555	0.00495344
Atf3	2.34488	3.80358	1.36784e-09	3.96797e-08
Rcan3	2.34452	4.58833	8.71912e-15	4.63712e-13
Spns2	2.3291	5.42425	6.75256e-16	3.96579e-14
Map1b	2.32686	5.2594	3.36362e-11	1.19702e-09
Sema4f	2.32135	3.77105	0.0005103	0.00463482
Grb10	2.31889	3.27608	0.000149832	0.00160982
Smad3	2.31626	5.86339	1.44164e-20	1.22131e-18
Arhgef40	2.31458	2.28265	0.00121493	0.00982308
Arhgef3	2.31101	4.18151	7.51774e-12	2.90191e-10
Irf2bpl	2.29967	3.73707	7.06732e-09	1.87411e-07
Slpi	2.28994	8.45073	1.41524e-21	1.25445e-19
Sh2d5	2.28537	6.14726	7.02322e-21	6.00298e-19
H2-K1	2.28085	4.97758	2.83536e-16	1.77404e-14
D630045J12Rik	2.27923	1.31625	0.00648551	0.0392451
Dock9	2.27075	5.65997	4.41901e-19	3.55489e-17
Chsy1	2.27071	3.28094	3.41342e-06	5.7127e-05
Nes	2.26731	4.1284	1.14878e-07	2.5281e-06
Zfp607	2.25147	1.22086	0.00844305	0.0486313
Ccne1	2.24829	4.41319	2.3195e-10	7.47629e-09
Dusp6	2.21288	4.63017	2.36209e-08	5.81293e-07
Paxbp1	2.1919	2.03868	0.00269231	0.0190517
Tnf	2.18983	4.06214	1.1473e-05	0.000170017
Mgat4a	2.18922	2.23395	0.00161266	0.0124903
Thbs1	2.18895	5.4468	9.33468e-08	2.083e-06
Igsf9	2.18335	3.85213	1.87976e-08	4.68619e-07
Ehbp1l1	2.15927	5.09335	4.48505e-11	1.5902e-09
Fgd3	2.15216	2.48983	0.000513568	0.00465631
Vps37b	2.14767	6.87136	2.25724e-11	8.24756e-10
Rnd1	2.14557	3.10812	3.04941e-05	0.000398798
Casp3	2.14307	3.12531	6.50982e-06	0.000104386
Plau	2.13472	4.71887	6.97874e-13	3.10732e-11
Aplp2	2.13105	7.93211	2.26484e-17	1.52685e-15
Meis3	2.13011	2.4096	0.000662672	0.00585217
Marcksl1	2.12882	6.77231	1.85057e-18	1.39493e-16
Klk8	2.12656	9.0307	6.14625e-23	6.19348e-21
Pvr	2.10594	4.61432	1.2575e-11	4.70237e-10
Slc1a1	2.10506	1.54961	0.00382744	0.0252516
Pvrl2	2.10233	5.55286	1.76347e-14	9.02764e-13
Phldb1	2.09792	3.67497	5.31278e-07	1.03372e-05
Tnfrsf23	2.09214	6.09638	9.10426e-18	6.27015e-16
Aplp1	2.08473	1.73452	0.00380814	0.025183
Csdc2	2.08406	2.11116	0.00177016	0.0135675
Smad7	2.08007	4.41332	4.00457e-08	9.53625e-07
Slc9a3r2	2.08004	2.45347	0.00153409	0.0120179
Ddx58	2.07696	3.47112	8.88207e-06	0.000135916
Fam214b	2.0705	2.38268	0.00525499	0.0329444
Fam134b	2.06717	4.59162	2.94765e-12	1.19567e-10
Lpcat1	2.06236	4.70396	3.58347e-12	1.41754e-10
Fam69b	2.06009	2.81491	0.000226918	0.00230115
Ccnd1	2.05857	9.42335	1.28053e-19	1.05677e-17
Tmem184b	2.05832	4.88293	6.77073e-14	3.29016e-12
Card10	2.05307	4.07978	1.88609e-08	4.68975e-07
Uaca	2.05124	6.11171	5.29275e-18	3.72555e-16
Col8a1	2.04598	2.97168	0.000104523	0.00116892
Fam132b	2.04337	3.62129	3.92866e-07	7.81893e-06
Lphn2	2.04056	4.42075	2.20603e-10	7.15875e-09
Fosl1	2.04036	6.07042	2.86877e-17	1.92047e-15
Cldn4	2.03956	8.80396	8.00275e-22	7.15984e-20
Acsbg1	2.03566	5.82832	1.77751e-10	5.82742e-09
Eno3	2.03042	3.14224	1.50733e-05	0.00021797
1810011O10Rik	2.02481	3.00955	6.20895e-05	0.000750484
Fth1	2.01786	10.5281	8.5308e-17	5.55546e-15
Dhrs3	2.01769	3.52642	0.000860002	0.00733108
Shf	2.00707	3.13134	8.89122e-05	0.00101933
Phlda2	1.99094	3.40495	8.88785e-06	0.000135916
Patz1	1.98489	3.02478	0.000312039	0.00305435
Tns3	1.98271	5.04112	4.55555e-12	1.79466e-10
Acp5	1.98231	5.723	1.61273e-13	7.64291e-12
Crb3	1.98158	5.79295	1.11258e-12	4.67138e-11
Tmem98	1.98046	4.60256	2.2514e-10	7.28129e-09
Jdp2	1.9798	4.97757	4.49177e-13	2.0379e-11
Fam64a	1.9673	4.00394	0.0024896	0.0179061
Sema4d	1.96709	2.67124	0.000816502	0.0070228
Pard6b	1.96263	3.85351	1.28238e-06	2.33388e-05
Clcn5	1.95485	4.90884	3.03177e-12	1.2246e-10
Ltbp3	1.95242	3.84854	1.05757e-05	0.000157696
Sult2b1	1.94807	8.46152	6.16421e-14	3.01071e-12
Cd82	1.94712	3.92275	3.81901e-06	6.32515e-05
Tgif1	1.9469	2.30032	0.00180289	0.0137522
E2f8	1.94583	3.01182	0.000268205	0.00267451
Crabp2	1.94363	5.93339	3.51508e-12	1.40208e-10
Steap2	1.93666	5.15646	2.93612e-12	1.19567e-10
Coro2a	1.92656	4.13044	4.10462e-08	9.72611e-07
Prrx2	1.92518	3.74201	2.71868e-05	0.00036047
Mxd1	1.92224	5.04326	1.74543e-11	6.45135e-10
Yjefn3	1.9162	2.78874	0.000249041	0.00249902
Zfp275	1.91197	4.13451	4.53064e-08	1.06565e-06
Slc1a5	1.90845	4.61355	5.44795e-11	1.91038e-09
C1galt1	1.90819	3.75847	1.11696e-06	2.05627e-05
Akr1b8	1.90706	6.2173	4.99138e-14	2.45038e-12
6720427I07Rik	1.89958	1.99883	0.00632304	0.0384565
Sprr2e	1.89463	3.64872	0.00255419	0.0183018
Lamc2	1.89261	9.54911	1.59464e-14	8.20726e-13
Lama3	1.87652	8.4951	2.29622e-14	1.16305e-12
Col4a1	1.8675	5.62201	1.29709e-10	4.41887e-09
Emp1	1.86662	6.7835	1.54379e-09	4.41155e-08
Lrig1	1.86445	2.95661	0.000562285	0.00505268
Morc4	1.86364	4.99009	8.83462e-12	3.3561e-10
Prr5	1.85927	2.41761	0.00356396	0.0238586
Mmgt2	1.85837	2.86733	0.000278147	0.00276501
Chpf	1.84651	4.51129	5.57747e-10	1.70042e-08
Dusp1	1.84456	2.58977	0.00289307	0.0202748
Cep164	1.83722	3.12783	0.000106376	0.00118826
Dyrk3	1.83293	3.74927	2.66269e-05	0.00035452
Bhlhe40	1.82784	3.59302	7.66647e-06	0.000120313
Ctsl	1.82306	7.56096	1.14853e-14	6.00813e-13
Fam114a1	1.81814	3.28348	0.000101927	0.00114525
Pitpnm1	1.81798	3.31571	2.78827e-05	0.000368676
Hoxb8	1.81087	2.80456	0.00310562	0.021427
Celf2	1.80895	3.15603	0.00188556	0.0142241
Tmsb10	1.80215	11.088	6.31998e-17	4.17249e-15
Rusc2	1.79865	4.99231	2.3148e-11	8.42569e-10
H6pd	1.79452	3.36598	4.03847e-05	0.000516848
4930402H24Rik	1.79289	3.68513	7.49947e-06	0.000117886
Ilf3	1.79183	3.14809	0.000189643	0.00196804
Hmgb3	1.79179	3.97675	4.36673e-07	8.63692e-06
Morn4	1.79092	3.33818	6.34155e-05	0.000765536
Txnrd1	1.78811	5.69234	1.4268e-10	4.81252e-09
Sox15	1.78677	5.02284	2.41973e-07	4.93903e-06
Defb14	1.78502	8.56764	1.88184e-12	7.83254e-11
Gm20544	1.77922	2.01392	0.0079066	0.0459562
Dap	1.77456	6.01528	7.56913e-13	3.32382e-11
Tnfrsf12a	1.77438	6.14912	3.32341e-10	1.04655e-08
Efemp2	1.76603	3.4721	0.000245112	0.00246736
Lpin2	1.76438	3.84804	2.59285e-05	0.000348123
Svil	1.75966	5.07873	8.7205e-10	2.59259e-08
Tmem176b	1.75628	6.54887	8.7652e-12	3.343e-10
Efnb2	1.7556	4.39914	2.93226e-06	4.94199e-05
Dhrs9	1.75403	5.59195	4.62644e-10	1.41952e-08
Slc12a2	1.75334	5.9039	2.43459e-12	1.00458e-10
Pttg1ip	1.74237	8.38986	1.87265e-16	1.18721e-14
Ptk2b	1.73183	5.19953	1.09428e-08	2.83123e-07
Dhh	1.72717	2.54447	0.0034582	0.0233465
Slco2a1	1.71932	7.01954	3.69408e-14	1.85149e-12
Cgn	1.71857	3.66821	0.000132718	0.00144705
Inhba	1.71766	4.60155	8.9383e-08	2.0086e-06
Phlpp1	1.71542	3.40379	5.60446e-05	0.000688723
Dhrs13	1.71423	3.00981	0.00151561	0.0119219
Kdelr3	1.7127	3.31024	0.000325785	0.00316945
Ttc12	1.70473	2.45576	0.00290436	0.020339
Gpr137b	1.69771	5.72629	7.18708e-09	1.90061e-07
Apbb2	1.69436	4.98875	1.44157e-09	4.14418e-08
Wee1	1.69183	5.32457	1.67963e-07	3.55732e-06
Ckap4	1.69113	5.5364	2.6845e-09	7.51425e-08
Tnfrsf22	1.6878	5.55904	1.00699e-09	2.95702e-08
Nt5dc2	1.68773	6.75502	5.33541e-10	1.63182e-08
Efhd2	1.68733	4.06264	8.34514e-06	0.000129478
Plk3	1.67983	6.4708	1.05732e-13	5.06084e-12
Pcdh7	1.67434	4.05578	2.2831e-05	0.000312766
Mir221,Mir222	1.66553	2.49823	0.0051127	0.0322636
Col4a2	1.65763	6.62113	9.07829e-09	2.38754e-07
Eid2	1.65597	4.18725	3.98559e-07	7.91578e-06
Nupr1	1.6559	6.86459	4.04267e-09	1.10573e-07
Cmtm3	1.65477	5.68	8.53512e-11	2.9497e-09
Nrip1	1.65148	4.93687	2.39737e-07	4.90386e-06
Pkn1	1.65123	2.68503	0.00346211	0.0233564
Cyr61	1.6489	2.66235	0.0066941	0.0403035
Arid5a	1.64646	4.27759	4.42934e-07	8.7427e-06
Agpat2	1.63955	5.59179	2.5477e-10	8.12972e-09
Atg9b	1.63624	5.50212	1.85032e-07	3.87595e-06
Fads1	1.63313	4.5434	9.17415e-08	2.05197e-06
Lrp8	1.63094	3.9781	3.16393e-06	5.31373e-05
Shroom3	1.61981	2.98557	0.00463593	0.0295668
Grasp	1.6183	3.95833	2.06954e-05	0.000287542
Ptprg	1.61706	2.56316	0.00387469	0.0254931
Whsc1	1.61459	4.68339	2.74019e-08	6.67477e-07
Bcat1	1.60707	3.65535	0.000392625	0.00371403
Lpgat1	1.60152	4.36415	7.90304e-06	0.000123419
Zdhhc21	1.5942	4.65203	2.93278e-08	7.12575e-07
Slc25a43	1.59358	3.8279	1.55045e-05	0.000222859
Arhgap40	1.59304	3.61043	8.96136e-05	0.00102494
Mal	1.58659	9.23797	5.44074e-09	1.4713e-07
Gdpd5	1.58355	3.85751	0.000360996	0.00346133
Trim26	1.58295	4.39255	2.94475e-07	5.97249e-06
Slc29a2	1.58053	2.73547	0.00389366	0.0255827
Sulf1	1.58047	3.44741	0.00073696	0.00643108
Anxa11	1.58031	7.15734	7.70406e-12	2.96189e-10
Hs6st1	1.57926	5.18056	3.35e-09	9.29553e-08
Cflar	1.57704	4.64527	7.00934e-07	1.34201e-05
Hoxa7	1.56933	4.90409	1.28538e-07	2.81801e-06
Gjb3	1.56406	6.48862	3.89692e-10	1.21121e-08
Tgfb1	1.53462	5.36122	4.36365e-08	1.03144e-06
Cmas	1.53448	6.01118	9.42232e-10	2.77538e-08
Bmi1	1.53192	3.00976	0.00540646	0.0337429
Ercc1	1.5279	7.00282	3.19198e-11	1.14445e-09
Ablim3	1.52196	3.99544	2.43381e-05	0.000331421
Micall2	1.51344	5.80061	5.33168e-09	1.4459e-07
Dcbld2	1.50998	4.33181	8.62703e-06	0.000132776
9130008F23Rik	1.50856	3.26346	0.000910578	0.00766663
Cd47	1.50777	5.33399	5.50358e-09	1.48042e-07
Il24	1.50709	6.99911	2.26983e-06	3.91516e-05
Src	1.50597	6.90727	1.66192e-10	5.48607e-09
Endod1	1.50356	7.15295	1.43275e-10	4.81252e-09
Ppapdc1b	1.50153	4.19652	2.54159e-05	0.000343168
Ano1	1.49809	6.19665	5.50539e-09	1.48042e-07
Cln3	1.49529	4.38431	1.42588e-06	2.57061e-05
Samd10	1.49217	3.65178	0.000375371	0.00357199
Spry2	1.49133	3.69825	0.000193298	0.00200048
Mapk8	1.49055	3.66716	0.00119587	0.00969349
Sh3bgrl	1.48919	3.55228	0.00351585	0.023586
Steap1	1.48242	3.66969	0.000179071	0.00188379
Aif1l	1.47901	4.42875	0.00017032	0.00180363
Dapp1	1.47642	2.93856	0.00525246	0.0329444
Vwa8	1.47325	3.05382	0.00349393	0.0235104
Nqo2	1.47321	4.0034	2.44863e-05	0.000332965
Sox4	1.46649	6.96125	1.51286e-07	3.24722e-06
Ngef	1.46569	3.78015	0.000210636	0.0021566
Myzap	1.46114	3.75073	0.000416103	0.00387109
Axl	1.45987	8.25832	3.04842e-11	1.09709e-09
Rab3ip	1.4594	4.65198	4.20781e-07	8.33982e-06
Lasp1	1.45888	8.01582	1.09742e-12	4.62804e-11
2010204K13Rik	1.45749	5.85708	5.72083e-09	1.53405e-07
Trib1	1.4568	4.4446	1.42801e-05	0.000206882
Mmp14	1.45507	7.11927	1.1057e-09	3.23696e-08
Alg10b	1.45497	3.81381	0.000136984	0.00148848
Slc20a1	1.45066	8.25494	6.37091e-11	2.22586e-09
Plekhh1	1.45063	4.29968	1.14549e-05	0.000170013
Ier5	1.44418	4.11194	0.000142562	0.00153688
Itgb1	1.44085	7.76702	6.95176e-12	2.6943e-10
Ctnnal1	1.43996	3.03568	0.00201307	0.0150449
Itga5	1.43994	4.61178	0.000138282	0.00150078
Slc25a30	1.43848	3.36753	0.00155197	0.0121183
Nppb	1.41754	4.21063	0.000914565	0.00769343
Ets1	1.41648	4.06107	4.92244e-05	0.000615981
Nrg1	1.41629	5.00582	9.01787e-08	2.02173e-06
Slc7a11	1.4154	3.03064	0.00269241	0.0190517
Smox	1.41539	5.65088	2.03545e-08	5.03497e-07
Tspan14	1.41406	4.85986	2.74809e-07	5.59734e-06
Bcar1	1.4128	3.8922	8.98731e-05	0.00102631
Nkain1	1.41009	4.61779	1.07801e-06	2.00511e-05
Adora2b	1.40766	4.02232	9.35475e-05	0.00106358
Etv4	1.40707	6.12881	1.84434e-08	4.60989e-07
Mllt11	1.40505	3.99546	0.000745909	0.00649735
Marveld2	1.40104	3.63622	0.000405367	0.00380822
Atp13a3	1.39825	5.6651	1.12287e-07	2.48251e-06
Fam110a	1.39546	5.25597	5.62985e-08	1.3018e-06
Hpcal1	1.39079	5.1104	1.53638e-07	3.29032e-06
Atp2b1	1.39043	5.54417	4.54417e-08	1.06621e-06
S100pbp	1.38811	3.40837	0.00106104	0.00877906
Gfpt1	1.38766	5.36642	5.5188e-08	1.27921e-06
Lrrc8c	1.3833	4.87091	3.05492e-07	6.16977e-06
F2rl1	1.38243	4.20038	0.000347654	0.00335155
Sparc	1.38012	8.99082	0.00262464	0.0187083
Rab43	1.37907	3.61083	0.00084452	0.00721838
Tmprss11b	1.3758	5.38125	5.36684e-05	0.000663782
Athl1	1.37437	3.15018	0.00690342	0.0413299
Rbm47	1.37123	2.97391	0.0042793	0.027717
Tgfbr1	1.37102	4.67129	2.40345e-06	4.12334e-05
Gramd1a	1.36915	3.88596	0.00139554	0.0110868
Rgs3	1.36847	3.15365	0.00409724	0.0267287
Zfand2a	1.36663	5.43352	1.04798e-07	2.32768e-06
Syne3	1.3622	3.20479	0.00269176	0.0190517
Fmnl3	1.35757	3.11036	0.00611817	0.0373767
Csnk1e	1.35116	5.76645	2.04857e-07	4.25813e-06
Cmtm4	1.35061	5.6261	2.28015e-07	4.6841e-06
Atf2	1.34815	3.40159	0.00133979	0.0106793
Btbd11	1.34762	4.56174	2.07656e-05	0.0002881
Cd276	1.34448	4.01702	0.000120392	0.00132931
Blvrb	1.34437	3.50371	0.000929573	0.00781282
Chka	1.34331	4.75035	2.3843e-06	4.09783e-05
Mllt4	1.3431	6.86682	3.77335e-09	1.038e-07
Sncg	1.3404	5.44355	0.00306527	0.0212022
Stambpl1	1.33978	4.85503	7.12263e-06	0.000113264
Nbeal2	1.33551	6.04273	1.66694e-08	4.21046e-07
Cd99l2	1.33466	5.08468	8.0373e-05	0.000937071
Ubxn8	1.33352	4.91959	6.46425e-05	0.000775468
Fst	1.3327	5.97872	2.59647e-05	0.000348123
Lmbr1l	1.33097	3.13959	0.00529966	0.0331593
Foxo1	1.32297	3.34221	0.0020489	0.0152639
Runx1	1.32059	4.30465	7.58456e-05	0.000891978
Fermt1	1.31817	4.99676	7.25375e-06	0.000114399
Rhoc	1.31604	6.95707	1.30929e-08	3.36028e-07
Ikbke	1.31517	5.47112	1.43119e-06	2.57533e-05
Pxk	1.31464	3.53201	0.00506816	0.0320247
Gprc5b	1.31331	5.71341	1.38616e-07	3.01584e-06
Epb4.1l1	1.31208	3.91101	0.00177622	0.0135961
Aifm2	1.31104	3.99752	0.000283655	0.00281101
B4galt3	1.3085	4.64856	4.86259e-06	7.95719e-05
Stab1	1.29966	3.86309	0.000400611	0.00376724
Aig1	1.29842	5.51417	6.79703e-07	1.30659e-05
Itpripl2	1.29644	7.85953	1.67595e-09	4.77496e-08
Syngr1	1.29047	4.30416	0.00010399	0.00116568
Acot7	1.28684	7.14797	5.41889e-07	1.0501e-05
Baiap2l1	1.28607	4.18305	5.92917e-05	0.000721219
Prkab1	1.28379	4.17998	0.000372581	0.00355251
Fam107b	1.28284	5.82567	7.52225e-08	1.70641e-06
Pxn	1.28167	6.95811	6.26852e-09	1.67622e-07
Nabp1	1.27867	4.88106	5.32025e-06	8.67645e-05
Mcoln1	1.27582	4.55003	0.000112139	0.00124682
Dhx32	1.27254	5.29074	1.3015e-06	2.36418e-05
Nck2	1.26853	4.73798	2.48163e-05	0.000336974
Tubb6	1.26598	8.37831	4.31825e-10	1.3335e-08
Slc22a23	1.26376	5.33519	2.41191e-05	0.000328906
Por	1.25769	7.14031	1.8264e-07	3.84243e-06
Smg9	1.25162	4.3724	0.000135549	0.00147455
Map1s	1.24695	5.04183	5.31953e-05	0.000658782
Ankrd28	1.24649	3.47586	0.00773288	0.0452764
Rpia	1.24619	4.80024	2.60012e-05	0.000348125
Galnt7	1.24532	3.46342	0.00234545	0.0170486
A430105I19Rik	1.24222	5.57791	1.10555e-06	2.04313e-05
Pmp22	1.24205	6.00057	0.000252713	0.00252792
Tmem263	1.24122	4.17932	0.000139143	0.0015051
9430015G10Rik	1.2328	3.4079	0.00328075	0.0224654
Spsb1	1.23179	4.87921	1.05592e-05	0.000157696
A430078G23Rik	1.23123	4.0002	0.00120267	0.0097404
Ankrd50	1.22878	5.26597	5.44667e-06	8.85246e-05
Sema3f	1.22632	5.78242	1.03882e-06	1.93852e-05
Osgin1	1.22589	4.26802	0.00050022	0.00457365
Mast4	1.22578	4.55873	0.000438535	0.00406793
Gsto1	1.22474	11.596	2.4412e-09	6.87342e-08
Tmem51	1.21892	6.12651	1.56523e-06	2.79031e-05
Ctbp2	1.21601	6.07473	2.28005e-07	4.6841e-06
Proser2	1.21539	4.77646	4.141e-05	0.000528558
Gdpd3	1.21384	3.13725	0.00728882	0.0432573
Dgkd	1.21337	3.7205	0.0033785	0.0229705
Fblim1	1.21111	4.75832	2.88955e-05	0.000381015
Rph3al	1.21104	4.00589	0.00125555	0.0101003
Sfxn3	1.21051	4.69616	0.000187631	0.00195663
Dok1	1.21046	4.80877	1.60301e-05	0.000229725
C77080	1.21037	6.14441	1.2864e-07	2.81801e-06
Pcdh1	1.20968	6.3083	1.79251e-06	3.13705e-05
Pxdc1	1.20548	4.26034	0.000173181	0.00182987
Hes6	1.20537	4.11124	0.0019962	0.0149527
Adam10	1.20495	5.89003	1.33101e-05	0.000194234
Adam8	1.20426	7.70715	7.29198e-08	1.66205e-06
Ccng2	1.20409	3.7348	0.00345259	0.0233258
Tspan3	1.20386	6.58342	2.05056e-07	4.25813e-06
Ppfibp1	1.20336	4.04421	0.000615173	0.0054884
Sept11	1.20186	6.76866	1.74939e-07	3.68874e-06
Vezf1	1.20074	5.03354	6.34202e-06	0.000102193
Obsl1	1.19744	3.84029	0.00579796	0.035809
Lman2l	1.19428	3.72996	0.00203481	0.0151708
Bmp1	1.18747	5.52882	0.00174299	0.0134021
Anxa1	1.18605	11.8052	6.37787e-08	1.46768e-06
Traf4	1.17956	5.05222	3.42707e-05	0.000443342
Epn2	1.1786	4.59291	3.7061e-05	0.000478147
Odc1	1.17796	9.66766	2.47356e-08	6.05611e-07
Met	1.17689	6.11185	1.32755e-06	2.40238e-05
Wsb1	1.16983	5.54673	4.28438e-05	0.00054468
Metrn	1.16961	3.81096	0.00234129	0.0170318
Furin	1.16855	6.57371	1.44291e-06	2.59156e-05
Ltbr	1.16692	5.24484	7.04528e-06	0.00011222
Col7a1	1.16293	4.98733	3.19124e-05	0.000415077
B4galt1	1.16257	5.94205	1.11631e-06	2.05627e-05
Arhgef2	1.16081	5.96129	1.51752e-06	2.7103e-05
Pmepa1	1.15858	7.7336	2.23697e-05	0.000307238
Wwtr1	1.1582	5.38618	7.1801e-06	0.000113612
Zfyve27	1.15751	3.90322	0.00350869	0.023571
2810008D09Rik,Gm26083	1.15717	3.57161	0.00595367	0.0365818
Elk3	1.15292	5.58426	2.95072e-05	0.000386948
E2f5	1.14507	3.91374	0.00554184	0.0344718
Rbpj	1.14444	4.04659	0.00313218	0.021556
Sh3d19	1.14285	5.92717	2.19712e-06	3.79658e-05
Dmwd	1.13974	4.42336	0.000239803	0.00242155
Tpst2	1.1369	6.17986	5.67311e-07	1.09493e-05
Itgav	1.13661	6.2506	4.66831e-06	7.67865e-05
Phldb2	1.13295	6.13809	2.00639e-05	0.000280471
Trim24	1.125	4.52546	0.000114219	0.001267
Fam171a1	1.12492	4.23777	0.000393388	0.00371757
Prss8	1.1244	4.57293	0.000160464	0.0017106
Pea15a	1.12418	5.87035	9.47386e-06	0.000143275
Nt5c2	1.12101	5.52146	3.01178e-05	0.000394416
Ezh2	1.1209	5.48542	9.68181e-06	0.000146189
Gm17709,NA	1.12002	4.86777	0.000131986	0.00144235
Pacsin3	1.11939	6.94745	1.23757e-06	2.26959e-05
Cks1b	1.119	6.58317	1.86174e-06	3.25227e-05
NA,Tpt1-ps3	1.11846	8.45693	9.17176e-06	0.000139589
Lbh	1.11627	4.05936	0.00150289	0.0118315
Fam84a	1.1131	4.84937	0.000415996	0.00387109
Ube2s	1.11074	4.9569	4.86939e-05	0.000611039
Syt8	1.10496	4.65449	0.000488673	0.00448091
Lsr	1.10127	6.51615	1.03778e-06	1.93852e-05
Rad9a	1.09984	4.35223	0.000412156	0.00384934
5730559C18Rik	1.09959	5.53687	0.000144615	0.00155725
Ubald2	1.09925	5.96325	1.23667e-05	0.000181575
Itpr3	1.09914	6.90923	2.65324e-06	4.51145e-05
Acads	1.09829	4.75476	4.8948e-05	0.000613323
Tinagl1	1.09786	5.98351	8.28614e-06	0.000128771
Anxa5	1.09435	8.31309	1.12106e-07	2.48251e-06
Mir31	1.09259	6.34155	8.9017e-05	0.00101933
Plin2	1.09129	8.07645	4.70642e-07	9.21361e-06
Ptprs	1.09032	4.91061	0.000310396	0.00304449
Blcap	1.08602	5.32332	8.5164e-05	0.000983443
Mgat5	1.085	4.38297	0.000350573	0.00337629
Gja1	1.083	5.90961	2.11178e-05	0.000292563
Phc2	1.08182	6.21408	3.48998e-06	5.81035e-05
Ptpn12	1.08102	5.92056	2.18433e-05	0.000300871
Rnf39	1.07967	5.81667	5.77101e-06	9.33208e-05
Msantd3	1.07824	4.49878	0.000329689	0.00320092
Pskh1	1.07442	3.47726	0.00795428	0.0461773
Mast2	1.07368	5.8417	1.05031e-05	0.000157104
Rab31	1.0657	5.33195	3.24509e-05	0.000421509
Cd44	1.06286	8.74939	4.59253e-05	0.00058077
Paox	1.06282	4.14344	0.00172635	0.0133277
Cuedc2	1.06198	4.57089	0.000873566	0.00741645
Vezt	1.05861	4.15009	0.00186965	0.0141375
Nt5dc3	1.05809	3.81487	0.00368316	0.0244854
Ptgs2	1.05799	6.23536	0.000139043	0.0015051
Frrs1	1.05588	5.88354	1.69448e-05	0.000241387
Col18a1	1.0555	7.8216	7.22271e-06	0.000114097
Rab11fip1	1.05496	3.84177	0.00540705	0.0337429
Agrn	1.05407	5.79964	1.51797e-05	0.000219179
Kdelr2	1.05206	5.05039	5.54206e-05	0.000681929
Tjp2	1.0504	5.66416	1.93362e-05	0.000271814
Hs2st1	1.04634	4.36953	0.0011879	0.00963711
Krtcap3	1.04617	4.9452	0.000179485	0.00188607
Bspry	1.04529	4.51827	0.00141035	0.0111766
Wnt9a	1.04397	4.2177	0.00140174	0.0111268
Igsf8	1.04306	4.44428	0.00068641	0.00604508
Cdk2ap2	1.0414	5.42686	0.000150188	0.0016118
Cbx3	1.04001	5.79108	1.66619e-05	0.000238066
Csrnp1	1.03823	4.14849	0.00266976	0.0189879
Ppp1r18	1.03801	6.97579	2.50463e-05	0.000339135
Kif23	1.03572	5.46788	2.62627e-05	0.000351136
Trim35	1.03541	5.28681	0.00045351	0.00419464
Hmces	1.0351	3.79182	0.00464652	0.0296146
Asap1	1.03375	4.71342	0.000367943	0.00351178
Cyb5r1	1.03242	5.93872	4.66238e-05	0.000588826
Zdhhc12	1.03212	4.92859	0.000102438	0.00114964
Calm3	1.02971	7.21874	1.0989e-06	2.03478e-05
Sepn1	1.02762	4.22371	0.00333112	0.0227452
Wasl	1.02623	5.66575	6.60032e-05	0.000788825
Fmnl2	1.02529	4.4742	0.000804316	0.00693668
Zbed4	1.02269	3.87759	0.00665424	0.040114
Tjp1	1.01814	5.40278	8.1924e-05	0.000952927
St14	1.01627	6.20058	9.36013e-06	0.000141779
Hexb	1.01592	4.56552	0.000381294	0.00361757
Ormdl1	1.01431	3.7496	0.00793108	0.0460705
Cenpe	1.01374	4.15872	0.00691574	0.0413766
Tiparp	1.01267	5.94809	0.000336266	0.00325488
Hsdl1	1.00933	3.82149	0.00729315	0.0432573
Zkscan17	1.00926	4.62154	0.00036732	0.00350934
Cpd	1.00775	3.97601	0.00446871	0.0286915
Galnt1	1.00727	5.08074	9.43076e-05	0.00106968
2610018G03Rik	1.00697	4.25101	0.00225132	0.016477
Plekho2	1.00597	4.4513	0.000821751	0.00705527
Itsn2	1.00596	4.73293	0.00173078	0.0133404
Arfgap3	1.0024	4.23777	0.00251494	0.0180477
Tmcc3	1.00239	4.63081	0.00591631	0.0363756
Zfpm1	-1.0001	4.41445	0.00283426	0.019921
Ech1	-1.0005	6.25885	1.02018e-05	0.000153075
Dtx2	-1.00736	6.36705	6.12941e-05	0.000741806
Taf13	-1.00745	7.08999	1.28903e-05	0.000188683
Tmem261	-1.00771	5.53175	7.1701e-05	0.000846354
Slc2a1	-1.01206	8.22354	2.01215e-06	3.49588e-05
Tyro3	-1.01789	4.42094	0.00106234	0.00878222
Col17a1	-1.01913	7.11294	2.45579e-06	4.20559e-05
Osbpl5	-1.01918	6.69358	3.95864e-06	6.53381e-05
Gm11942	-1.01956	8.08238	2.75989e-05	0.000365428
Bnip3l	-1.02153	6.01695	1.9688e-05	0.000276204
Grhpr	-1.02331	5.76745	5.2414e-05	0.00065079
Pgam1	-1.02359	10.4924	4.67833e-07	9.17739e-06
Rnf208	-1.02367	6.45254	8.84139e-06	0.000135639
Atg13	-1.02436	4.50468	0.000874666	0.00741645
Sowahc	-1.02446	4.60395	0.000311398	0.00305119
Cd24a	-1.02515	10.2239	1.3915e-06	2.51336e-05
Tpi1	-1.02642	9.73088	1.78711e-06	3.13333e-05
Hif1a	-1.02791	7.24147	1.51564e-06	2.7103e-05
Rnf181	-1.02863	6.51523	1.2258e-05	0.000180255
Neurl1a	-1.02949	3.93778	0.0036801	0.024482
Pbx1	-1.03177	5.68156	4.15934e-05	0.000530191
Ndufv3	-1.03407	7.38173	1.01226e-06	1.90362e-05
Ercc5	-1.03686	5.41657	5.90153e-05	0.00071877
Usp2	-1.04322	3.79089	0.00688391	0.0412905
Rxra	-1.04324	6.52743	5.68081e-06	9.20176e-05
Map4	-1.04349	7.62414	5.17693e-07	1.0114e-05
Emc2	-1.04394	5.12479	0.000538985	0.00485847
Txnrd3	-1.04851	4.91159	7.76241e-05	0.00091008
Serpinb8	-1.04982	5.2773	7.76701e-05	0.00091008
Lynx1	-1.05837	4.24826	0.00402674	0.0263486
Clp1	-1.06187	4.57252	0.00143369	0.0113427
Echdc1	-1.06517	5.07464	9.5396e-05	0.00108074
Notch1	-1.06637	4.54441	0.000361757	0.0034631
Wdtc1	-1.07544	5.70162	9.12355e-06	0.000139107
Hagh	-1.07626	5.66227	2.06161e-05	0.000286857
Gm26532,Mir23a,Mir24-2,Mir27a	-1.08476	4.25214	0.00160897	0.0124819
Btbd19	-1.08684	5.98617	8.56235e-06	0.000132013
Exoc4	-1.0964	6.10283	2.73412e-06	4.64074e-05
Calcoco1	-1.09722	3.65142	0.0078962	0.0459236
Lyrm1	-1.09885	3.81043	0.00267431	0.0189919
Krt80	-1.09937	8.01877	1.65993e-07	3.52339e-06
Rrp12	-1.0994	5.16884	6.09119e-05	0.000738113
Il17rc	-1.10003	6.62744	7.80049e-07	1.4905e-05
Sqrdl	-1.10382	4.68522	8.99481e-05	0.00102631
Mapkbp1	-1.10418	3.56087	0.00605904	0.0371102
Pfkp	-1.10937	6.18642	2.91361e-06	4.92792e-05
Ahcyl2	-1.11107	4.48504	0.000165799	0.00176159
Fam53b	-1.11251	5.11884	0.000502047	0.00458438
Rnd3	-1.11252	5.3973	3.75583e-05	0.000482612
Limk2	-1.1159	7.51861	8.43355e-08	1.90861e-06
Ptgr1	-1.11967	6.7856	1.17155e-06	2.15264e-05
Pkp3	-1.1217	8.43955	3.19466e-07	6.43842e-06
Fech	-1.12637	5.42194	1.42849e-05	0.000206882
Rab15	-1.13421	4.03024	0.00136871	0.0108917
Dynll1	-1.1384	9.99478	4.04385e-08	9.60589e-07
Atp13a2	-1.13847	5.0358	0.000147199	0.0015833
Renbp	-1.14139	6.71714	8.66125e-07	1.64186e-05
Gpr115	-1.1452	4.64353	5.73663e-05	0.000701364
Pgk1	-1.15017	9.95293	1.77499e-08	4.44817e-07
Prkci	-1.15357	3.83336	0.00145031	0.0114553
Cd3eap	-1.15472	4.13008	0.000502352	0.00458438
Akap13	-1.15866	4.51608	0.000108813	0.00121266
Cds1	-1.159	3.9742	0.00206015	0.0153358
Acap3	-1.16207	4.73114	5.05178e-05	0.000630517
Mxi1	-1.16363	6.62402	1.59941e-07	3.40247e-06
Slc39a6	-1.16435	6.76958	4.64572e-07	9.13213e-06
Fam83g	-1.1667	7.16299	1.71299e-07	3.61998e-06
Higd1a	-1.17475	7.02221	3.45501e-06	5.76217e-05
Dbnl	-1.18418	6.25331	1.46388e-07	3.14916e-06
Klk7	-1.1897	6.29398	0.000518366	0.00469472
Zfp772	-1.19846	3.82207	0.00103004	0.00855954
Prkcdbp	-1.20128	7.19458	5.80422e-08	1.33889e-06
2900026A02Rik	-1.20589	5.42207	1.16239e-05	0.000171926
Ephx1	-1.20899	6.20071	1.48672e-06	2.66523e-05
Klf4	-1.20952	5.37988	2.57159e-05	0.000346429
Smagp	-1.20969	5.18244	9.9699e-05	0.00112153
Afap1l2	-1.21621	4.29948	0.000209513	0.0021497
Bicd2	-1.21991	6.8047	2.11011e-06	3.65944e-05
Oxr1	-1.22035	5.58181	2.49159e-05	0.000337847
Cnksr3	-1.22363	4.7215	1.90162e-05	0.000267709
Evpl	-1.22407	7.01584	1.29288e-07	2.82573e-06
Csrp1	-1.22425	8.86837	6.68653e-09	1.77806e-07
Wdr61	-1.22603	4.23773	0.000114917	0.00127326
Trim71	-1.22747	4.30635	0.000281618	0.00279661
Sprr1b	-1.234	11.3889	2.16178e-05	0.000298625
Auts2	-1.23454	3.87867	0.00264568	0.0188306
Trim2	-1.24102	5.10708	1.0154e-05	0.000152597
Gatsl3	-1.25087	4.63898	8.5907e-05	0.000990829
Myl9	-1.25121	4.36606	0.000649683	0.00575871
Fchsd1	-1.25577	4.45563	3.05844e-05	0.000399433
Pdzk1ip1	-1.26275	5.41677	1.24183e-06	2.27305e-05
Gss	-1.26315	5.61587	1.64619e-06	2.91833e-05
Ovol1	-1.26571	5.84234	6.82385e-07	1.30911e-05
Sfr1	-1.2722	9.08036	1.44084e-09	4.14418e-08
Pgp	-1.27587	4.38921	5.12131e-05	0.000637534
Map6	-1.27965	7.12856	7.20964e-09	1.90132e-07
Abcg2	-1.28457	5.02297	2.13312e-05	0.000295091
Ddi2	-1.28514	3.30795	0.00316214	0.0217465
Lrrc24	-1.29733	3.96622	0.000188918	0.00196364
Gpnmb	-1.29957	6.73707	0.000473624	0.00435962
Vgll3	-1.30762	4.26505	0.000459967	0.00424616
Ctnnbip1	-1.30964	4.11604	0.000203947	0.00209709
Trex1	-1.31413	3.847	0.000717929	0.00628795
Ckb	-1.31535	4.8019	2.15163e-06	3.7247e-05
Dip2b	-1.32177	5.62438	9.45811e-07	1.78585e-05
Dapk2	-1.3224	3.6892	0.00360302	0.024036
Tspan5	-1.32603	3.92867	0.00027755	0.00276194
Mvk	-1.32771	5.52089	1.29818e-07	2.83086e-06
Ppfia3	-1.33584	3.11811	0.00340116	0.0230917
Rfng	-1.3359	4.92261	3.14375e-06	5.28913e-05
Deptor	-1.33632	3.64176	0.00218494	0.0160772
Jup	-1.34268	8.48598	1.01638e-08	2.64397e-07
Lss	-1.3429	4.02129	0.000199383	0.00205751
Mgmt	-1.35204	5.34652	0.000414583	0.00386447
Id1	-1.3536	7.17897	1.711e-06	3.02762e-05
Papss2	-1.35394	3.05161	0.00714403	0.0425839
Prosc	-1.36359	5.60493	5.47146e-07	1.05815e-05
Gstk1	-1.36413	3.71233	0.00157839	0.0122845
Hrsp12	-1.36595	3.68753	0.000475841	0.00437582
Sytl1	-1.37008	6.18544	2.1659e-09	6.15256e-08
Ssx2ip	-1.3743	5.66467	2.43389e-08	5.97428e-07
Dsc3	-1.37547	6.4872	1.764e-06	3.10991e-05
Pfkfb3	-1.37826	5.22497	0.00116927	0.00951825
Tnfrsf18	-1.37881	2.79127	0.00858284	0.0491703
Mbnl1	-1.38075	6.60037	8.25425e-10	2.46162e-08
Cdsn	-1.38163	7.08632	5.11887e-09	1.3961e-07
Arhgap29	-1.38186	4.30349	1.5262e-05	0.000220034
Zfp672	-1.38858	3.95181	7.69877e-05	0.000904298
Hsdl2	-1.38947	4.5432	3.41974e-06	5.7133e-05
Epb4.1l4b	-1.39165	6.40671	8.77813e-10	2.59361e-08
Gpr56	-1.39394	5.1742	4.90988e-06	8.02086e-05
Krt14	-1.39905	14.0339	1.76615e-13	8.28792e-12
Leprel4	-1.40526	6.53907	5.25846e-07	1.02524e-05
Myh14	-1.40586	5.53289	1.40383e-07	3.04735e-06
Mtmr1	-1.40856	4.06639	8.63134e-05	0.000994318
Gstm2	-1.4118	3.2019	0.00217195	0.0160309
Itgb3bp	-1.41646	2.98881	0.00432503	0.0279565
Serpinb10	-1.41885	4.15357	0.000870483	0.00740723
Pmm1	-1.42252	6.81616	3.82367e-09	1.04883e-07
4631405K08Rik	-1.42533	4.92683	1.61067e-06	2.86597e-05
Sfn	-1.42826	12.1722	3.21451e-12	1.29296e-10
Itpk1	-1.43094	4.91927	3.01803e-07	6.10817e-06
Fam212b	-1.43596	4.07723	4.47226e-05	0.000567059
Duox1	-1.43746	6.62058	1.36925e-05	0.000198905
Epb4.1l3	-1.43751	5.3746	8.25929e-07	1.57189e-05
Tuft1	-1.44003	5.72877	2.34449e-07	4.80594e-06
Tmem64	-1.44222	3.20616	0.00410158	0.0267287
Slc25a12	-1.44648	4.95451	1.94414e-07	4.0636e-06
Myl7	-1.46882	6.60586	3.21578e-09	8.94904e-08
Zfp691	-1.47162	2.84661	0.00325281	0.02229
Pinlyp	-1.47525	3.01166	0.00508866	0.0321331
Klrg2	-1.47724	4.99101	2.18042e-07	4.49852e-06
Serpinb5	-1.48374	9.30053	2.48303e-12	1.02018e-10
Rmnd5a	-1.49113	4.29437	9.33313e-06	0.000141594
Zfp703	-1.49132	7.02621	3.19997e-08	7.73567e-07
Cbr3	-1.49308	3.26117	0.000730552	0.00638683
Msrb3	-1.50419	3.68453	9.84643e-05	0.00110894
Nod2	-1.51738	2.92221	0.00279777	0.0197084
Kctd17	-1.51785	4.13934	7.05941e-05	0.000836383
Dbi	-1.52657	9.58865	1.4428e-12	6.03139e-11
Serpinb1b	-1.53366	2.95651	0.0034472	0.0233258
Abcb6	-1.5407	2.8128	0.00233931	0.0170318
Zbtb5	-1.54581	3.44465	0.000406055	0.00381095
Hspa1b	-1.54693	6.53839	1.54958e-07	3.31119e-06
Tmem14a	-1.5507	2.61434	0.00438273	0.0282341
2310002J15Rik	-1.55216	7.54574	5.43168e-12	2.13104e-10
Car13	-1.55663	6.6606	6.93586e-10	2.09429e-08
Dcxr	-1.56233	5.83898	1.50553e-10	5.00432e-09
Zfp365	-1.56342	3.87878	4.23813e-05	0.000539516
Bphl	-1.56584	2.52642	0.00644737	0.039039
Gpcpd1	-1.56607	3.67113	0.000452825	0.00419236
Glo1	-1.56843	7.65456	6.95494e-13	3.10732e-11
Hspb8	-1.57307	6.99523	6.14288e-12	2.40024e-10
Tfeb	-1.57594	2.61877	0.00724845	0.0430455
Il1rl2	-1.57858	3.02898	0.00143903	0.0113756
Capn1	-1.59057	8.2701	2.46184e-14	1.24038e-12
Tom1l2	-1.59318	5.4907	3.79093e-10	1.1821e-08
Dffa	-1.59581	4.78794	1.57091e-08	3.98893e-07
Mxd4	-1.60207	5.38864	1.23363e-09	3.58953e-08
2010111I01Rik	-1.61068	5.83881	1.44142e-10	4.82472e-09
Flt3l	-1.61133	2.67586	0.00253353	0.0181674
Pcbp3	-1.61642	3.88954	8.22701e-05	0.000955791
Ugt1a2,Ugt1a6a	-1.61788	3.2234	0.000998446	0.00833315
Ugt1a1,Ugt1a10,Ugt1a5,Ugt1a7c,Ugt1a9	-1.61788	3.2234	0.000997022	0.00832853
Ugt1a6b	-1.61789	3.2234	0.000981123	0.00820658
Vsnl1	-1.61879	4.92161	3.83332e-06	6.33789e-05
Ces2g	-1.62389	4.61075	2.70832e-08	6.61397e-07
Ttpa	-1.6242	3.38695	0.000895161	0.00755011
Trnp1	-1.62688	7.05085	4.03449e-13	1.84795e-11
Iffo2	-1.64026	8.44922	1.04057e-13	5.00569e-12
Sgk1	-1.64654	5.43568	2.43304e-10	7.81595e-09
Nrtn	-1.64933	4.16266	1.22057e-05	0.000179761
Ldha	-1.6499	11.3293	7.32576e-15	3.91785e-13
Avpi1	-1.66342	9.52426	4.50751e-15	2.42418e-13
Krt6a	-1.66597	13.9628	3.87489e-18	2.83163e-16
Serpinb9b	-1.666	7.8805	2.8776e-12	1.17723e-10
Ttc37	-1.66655	3.69569	2.57298e-05	0.000346429
Epha1	-1.66815	4.11781	5.36365e-07	1.0415e-05
Vsig10l	-1.67374	4.49289	4.82351e-06	7.90675e-05
Serpinb6b	-1.68604	4.10496	1.33623e-05	0.000194699
Kctd1	-1.6872	4.88205	2.19138e-09	6.20653e-08
Rnf144b	-1.69544	5.47837	1.4997e-10	5.00231e-09
A630095N17Rik,Tuba4a	-1.70822	2.86386	0.0029814	0.0208024
Psapl1	-1.71129	5.57208	2.1917e-08	5.4075e-07
Dmkn	-1.72132	10.8191	7.11251e-13	3.15222e-11
Trim29	-1.72187	9.72141	1.20416e-16	7.78879e-15
Mlycd	-1.7265	3.187	0.000272551	0.00271502
Sptbn2	-1.73192	4.38731	2.07309e-07	4.2956e-06
Gm26917	-1.73822	4.04564	0.00407941	0.0266386
Tmem140	-1.74474	4.32578	7.16077e-08	1.63995e-06
Slco3a1	-1.75323	2.17204	0.00811739	0.0470102
Prelid2	-1.76079	2.75348	0.00438266	0.0282341
Lce3b	-1.76225	3.25575	0.00125091	0.0100799
Col11a1	-1.7699	3.47467	0.00642791	0.0389705
Fam189a2	-1.77477	3.58358	4.33367e-05	0.000550215
Camsap3	-1.77647	6.22432	8.27375e-13	3.58392e-11
Fam25c	-1.77758	7.4852	3.35832e-05	0.000435626
Ssbp2	-1.77786	4.19609	1.13307e-07	2.49927e-06
Aldoc	-1.77788	3.89277	3.64984e-06	6.05545e-05
Scgb2b27	-1.77886	5.15634	2.69264e-05	0.000357512
Dlc1	-1.78202	5.87965	8.91793e-13	3.84556e-11
Limch1	-1.7899	4.53305	2.166e-07	4.47843e-06
Wwox	-1.79215	2.9176	0.000569473	0.00510924
Cxcl14	-1.79621	4.25739	9.78868e-07	1.84463e-05
Maoa	-1.80119	5.1835	4.52021e-11	1.59675e-09
Atp2b4	-1.81592	3.13358	0.000659231	0.00582716
Gltp	-1.82303	9.53522	2.36446e-11	8.57384e-10
Pfkl	-1.82416	6.78036	4.56284e-14	2.25155e-12
Scn1b	-1.83002	3.00361	0.00444762	0.0285752
Dgat2	-1.832	4.69357	7.36173e-08	1.67396e-06
Rapgefl1	-1.83883	3.86347	1.89129e-05	0.000266647
Adtrp	-1.84239	5.03529	4.25974e-10	1.31969e-08
Bnipl	-1.84286	3.83309	1.92457e-06	3.3498e-05
Stim1	-1.84611	5.72695	9.86275e-13	4.215e-11
Degs2	-1.84665	3.65962	0.0058896	0.0362813
Dact2	-1.84871	4.52421	0.000283468	0.00281101
Ccnd2	-1.85391	9.1974	7.201e-10	2.16098e-08
Sbsn	-1.86191	10.8428	2.93851e-07	5.97247e-06
Smpdl3a	-1.8707	3.16766	0.000778987	0.00673645
Cd164l2	-1.87558	2.2372	0.0056594	0.0350613
Khk	-1.8816	3.33245	2.82698e-05	0.000373278
Krt5	-1.88231	13.8268	1.49361e-22	1.42983e-20
Dsp	-1.88606	10.182	7.86499e-17	5.15695e-15
Arhgdig	-1.88966	5.45952	3.57096e-09	9.85153e-08
Tlcd1	-1.89092	1.9333	0.00673936	0.0405505
Tap1	-1.90045	3.08335	0.000407728	0.00381542
Lzic	-1.91501	3.11651	4.7289e-05	0.00059644
Spink5	-1.92265	7.36013	4.12427e-13	1.88008e-11
Nrbp2	-1.93015	2.66629	0.00225345	0.01648
Pdrg1	-1.9336	6.3914	4.6065e-16	2.79102e-14
Sepp1	-1.93821	2.58976	0.000697191	0.00612875
Cited4	-1.94035	2.14663	0.00268572	0.0190517
Hopx	-1.94711	7.51863	3.28494e-11	1.17338e-09
Wnt4	-1.95521	7.48448	2.40031e-15	1.32058e-13
Rasl10a	-1.95783	1.94479	0.00634225	0.0385488
Ces2f	-1.9644	2.72937	0.000229773	0.00232518
Gjb2	-1.96791	1.781	0.00657257	0.0396716
Acad11	-1.96795	3.70182	9.89959e-06	0.000149242
Cyp2s1	-1.96828	2.39906	0.00135509	0.0107922
Endou	-1.96922	7.69047	7.61335e-13	3.32797e-11
Foxn1	-1.98383	5.05833	9.59262e-11	3.30324e-09
Nccrp1	-1.98779	6.75556	8.05924e-13	3.50687e-11
Rabgap1l	-2.00199	2.89472	8.26194e-05	0.000958686
Lor	-2.01145	7.2948	0.00194249	0.0145765
Vwa5a	-2.01488	3.49831	5.52617e-06	8.96644e-05
Tmem229b	-2.02231	3.12769	0.000374778	0.0035699
mt-Nd6,mt-Ta,mt-Tc,mt-Te,mt-Tn,mt-Ts1,mt-Ty	-2.04375	1.64442	0.00531138	0.0332109
Enah	-2.04524	7.58812	5.66983e-21	4.88985e-19
Pdcd4	-2.04676	4.42853	4.55976e-07	8.9816e-06
Casz1	-2.04683	1.94351	0.00783614	0.0456767
Crnn	-2.05459	2.32792	0.0015683	0.0122159
Asb13	-2.07586	4.05115	1.60623e-08	4.06785e-07
Hspb1	-2.0779	11.5847	1.81355e-24	2.0917e-22
Krt17	-2.08013	13.8636	2.40347e-26	3.10924e-24
Acsl1	-2.09382	3.11804	1.29221e-05	0.00018886
Plb1	-2.12009	2.13826	0.00124147	0.0100207
Anxa8	-2.12892	9.74546	3.08521e-22	2.89556e-20
Mreg	-2.15309	4.91349	1.09914e-14	5.81332e-13
Adamts1	-2.15407	4.82009	1.37355e-10	4.66275e-09
Olfm1	-2.15578	1.76373	0.00373127	0.0247536
Ngfrap1	-2.15628	9.96868	9.71318e-20	8.08559e-18
2510009E07Rik	-2.16	2.70756	9.37195e-05	0.00106427
Evi5l	-2.17225	4.52876	8.17383e-11	2.83508e-09
Trim7	-2.1772	5.05855	2.16612e-15	1.2056e-13
Cebpa	-2.18262	5.20559	1.09422e-13	5.21141e-12
Cyp1b1	-2.20544	4.29069	1.46265e-09	4.19219e-08
Aknad1	-2.21337	1.95075	0.0026051	0.0186248
Ptch1	-2.22616	2.70202	0.000508678	0.00462887
Plxdc2	-2.23261	4.8221	2.58793e-15	1.40763e-13
Cst6	-2.23781	7.75094	5.32691e-24	5.86144e-22
Dct	-2.24127	7.31379	6.39824e-05	0.000769477
Hr	-2.27426	5.9971	1.5177e-19	1.24179e-17
Ckmt1	-2.27574	7.17005	2.11747e-22	2.00698e-20
Spon2	-2.27795	2.84838	1.85656e-05	0.000262137
Hsp25-ps1	-2.28144	12.1282	2.78469e-29	5.12651e-27
Dst	-2.28483	8.39731	1.34997e-25	1.63586e-23
Sord	-2.29577	5.38994	1.47212e-15	8.24126e-14
Sesn1	-2.29788	2.84658	9.30661e-06	0.000141416
Sox21	-2.31082	3.34014	8.5637e-06	0.000132013
Lce1k	-2.31552	2.51702	8.66324e-05	0.000996793
Trp53inp1	-2.31716	5.76457	1.21718e-14	6.30777e-13
Art4	-2.31775	1.59906	0.00783943	0.0456767
Cyp26b1	-2.32058	5.85777	6.4705e-20	5.43352e-18
Cry2	-2.32572	4.58689	8.30642e-14	4.01603e-12
Slc36a4	-2.33152	2.87505	2.66172e-05	0.00035452
Papl	-2.33653	1.44286	0.00267364	0.0189919
Rassf4	-2.36379	3.97601	3.72475e-05	0.000479906
Zfp385a	-2.37845	6.34081	1.3064e-16	8.39337e-15
Mfap3l	-2.38148	3.4907	5.41699e-06	8.81919e-05
Ly6a	-2.38416	9.14914	1.65617e-26	2.20201e-24
Hist1h4h	-2.38661	3.51195	1.08436e-06	2.01174e-05
Pxmp4	-2.38678	2.42835	7.83074e-05	0.000916426
Ly6g6c	-2.39487	6.71058	8.6029e-19	6.64158e-17
Zfp185	-2.39788	4.04243	9.86337e-09	2.57281e-07
Msx2	-2.39925	2.95289	3.57331e-06	5.93877e-05
Capn5	-2.40098	3.45565	5.15192e-08	1.19707e-06
Prss23	-2.40919	7.45884	7.068e-22	6.3832e-20
Clec2e	-2.42068	2.14216	0.00082449	0.00707244
Mest	-2.42484	4.6501	1.25292e-08	3.22424e-07
Smtnl2	-2.42734	2.50452	5.51343e-05	0.00067928
Lce3e	-2.43394	4.66965	9.39235e-09	2.46337e-07
Exph5	-2.43746	0.928192	0.00625044	0.0380875
Fgd2	-2.43796	2.0699	0.00304099	0.0210647
Acta2	-2.4499	6.31686	1.05251e-08	2.73055e-07
Ak4	-2.46626	2.72811	7.34834e-06	0.0001157
Syt4	-2.47882	4.85758	1.58975e-05	0.000228167
Ifitm10	-2.48604	4.67049	3.70346e-16	2.27264e-14
Maf	-2.50016	2.72991	0.0026961	0.0190619
Rab3b	-2.53044	0.478985	0.008046	0.0466531
Ank	-2.5324	3.27919	4.679e-08	1.09249e-06
Kcnk7	-2.53987	2.86217	0.00386111	0.0254212
Casp14	-2.54625	5.71662	6.42795e-09	1.71406e-07
Casq2	-2.55466	6.27331	4.89036e-26	6.09486e-24
Grhl1	-2.57324	3.07557	3.47007e-07	6.97878e-06
Pmel	-2.57666	7.38991	1.77725e-06	3.12177e-05
Gm15698	-2.59257	4.74539	1.14727e-14	6.00813e-13
Clybl	-2.59505	2.85408	6.39616e-05	0.000769477
Lgals7	-2.60243	9.58465	7.02344e-24	7.64039e-22
Aqp3	-2.62432	8.09921	5.9295e-28	8.86923e-26
Nkx2-9	-2.64262	0.970761	0.0023969	0.017383
Fam132a	-2.65326	6.1851	8.917e-16	5.11152e-14
Tmprss13	-2.66991	4.81021	2.1914e-13	1.01836e-11
Fam162a	-2.67043	8.08356	3.91138e-28	6.1383e-26
Cpn1	-2.67193	1.6669	0.00461647	0.0294623
Mgst2	-2.67474	3.61022	3.14118e-10	9.95711e-09
Vnn1	-2.67906	2.15343	0.000225884	0.0022931
Cdc42ep2	-2.68	2.87093	0.00017554	0.00185071
Krt16	-2.69024	12.3727	2.49652e-21	2.19258e-19
Atoh8	-2.69711	2.08174	0.00186556	0.0141178
Otud1	-2.70919	1.83475	0.00109603	0.00899858
Grtp1	-2.74725	2.60775	4.70399e-06	7.72407e-05
Spink8	-2.75255	3.56136	1.11278e-08	2.87133e-07
Krt75	-2.7802	5.26958	1.69847e-13	8.00959e-12
Orm1	-2.78555	3.46205	1.45958e-07	3.14697e-06
Tubb3	-2.78863	7.39436	1.71417e-27	2.48633e-25
Pdk1	-2.83346	5.21186	9.25205e-23	8.94645e-21
Cdh13	-2.84244	2.74987	2.92488e-06	4.93826e-05
Osbpl1a	-2.85207	3.45894	2.20083e-10	7.15875e-09
C2	-2.85643	1.03264	0.00281999	0.0198352
Kit	-2.85769	1.33225	0.00351959	0.0235946
Pla2g2f	-2.87235	3.8054	0.00840222	0.0484545
Serpina3n	-2.91049	2.25379	0.000160864	0.00171106
Mb	-2.9186	1.99075	0.000811017	0.00698189
Fabp5	-2.91944	11.2405	4.9849e-36	1.40354e-33
Filip1l	-2.91958	3.33731	7.96742e-10	2.3835e-08
Adamts15	-2.92615	4.46361	2.59374e-13	1.19951e-11
Tmprss4	-2.94095	3.22964	1.44573e-08	3.68085e-07
Serpinb6c	-2.94214	7.41604	5.31985e-23	5.41776e-21
Serpina3e-ps	-2.94971	2.2435	0.00183935	0.0139646
Fam105a	-2.9525	0.788107	0.00272977	0.0192714
Sptlc3	-2.95299	4.93056	4.52854e-22	4.16843e-20
Slc15a3	-2.97916	2.69736	1.62402e-06	2.88437e-05
Prickle2	-2.97957	1.67383	0.00172801	0.0133297
Lce1a1	-2.98556	5.31724	0.000129619	0.00142135
4930538K18Rik	-2.98658	1.66151	0.000838739	0.00718179
Rgs11	-3.00835	1.00431	0.000589796	0.00528367
Upk1b	-3.02048	4.37999	3.42997e-12	1.37385e-10
Timp3	-3.02662	7.39819	4.8528e-16	2.92175e-14
Mlana	-3.0315	5.84337	3.3504e-08	8.03844e-07
Pdlim2	-3.04838	3.91744	3.33885e-08	8.03086e-07
Cyp4f39	-3.06252	3.72494	1.12261e-11	4.2144e-10
Il1f5	-3.08011	2.98659	1.03681e-05	0.000155327
Chac2	-3.10705	0.344032	0.00269267	0.0190517
Rnase4	-3.12044	3.2486	3.19697e-10	1.01005e-08
Lce1a2	-3.14057	5.92877	1.25457e-06	2.29198e-05
Kprp	-3.15336	4.51842	1.15279e-18	8.75848e-17
Gjb6	-3.17584	1.80291	5.68548e-05	0.00069689
Tgm3	-3.17844	3.35755	0.00493865	0.0312683
Phospho1	-3.18145	4.263	2.29664e-15	1.27085e-13
Sh2d4a	-3.19729	1.29735	0.000250681	0.00251021
Pax8	-3.20413	1.31734	0.000543535	0.00489488
Fez1	-3.23507	3.95613	4.75744e-08	1.1081e-06
Cpm	-3.24796	2.46334	3.65197e-07	7.31388e-06
Smarcd3	-3.24976	0.217451	0.00515256	0.0324083
Cbs	-3.26949	1.47471	6.881e-05	0.000818283
Arhgef19	-3.27899	0.242087	0.00606662	0.0371328
Kank1	-3.29372	5.64325	8.34747e-19	6.49678e-17
Ly6g6e	-3.29403	2.0873	6.12282e-06	9.88428e-05
Ly6c1	-3.30487	4.63684	2.52647e-10	8.08892e-09
Krt42	-3.30939	5.63863	4.46868e-22	4.15327e-20
Oas1c	-3.32383	-0.0693288	0.00420673	0.0273024
Krt32	-3.38727	1.01926	0.00106368	0.00878572
Slc40a1	-3.38911	0.546165	0.00622468	0.0379547
Fxyd4	-3.42652	1.8351	8.74461e-06	0.000134369
Krt6b	-3.44372	8.85171	7.22709e-34	1.64726e-31
Them5	-3.45677	4.75414	1.67987e-19	1.36283e-17
Palmd	-3.46583	1.07195	0.000337963	0.003268
Gm11992	-3.48412	0.363892	0.00201185	0.0150449
Efna3	-3.49015	6.01097	6.44969e-34	1.50592e-31
4732456N10Rik	-3.49121	6.87387	2.0529e-18	1.53534e-16
Dsc1	-3.51159	3.86393	0.00045167	0.00418571
Fetub	-3.51254	-0.351678	0.00730916	0.0433254
Serpinb1a	-3.53635	4.29893	3.52425e-07	7.07289e-06
Sdr16c5	-3.56793	4.19907	7.79557e-19	6.11696e-17
Phyhip	-3.57688	4.25221	1.08859e-17	7.44364e-16
Agrp	-3.57796	3.39594	1.05053e-10	3.5917e-09
Ndufa4l2	-3.58648	1.51915	0.00053342	0.00482194
Akap2	-3.60463	3.37554	3.24885e-13	1.49525e-11
Rec114	-3.61256	2.66052	1.36421e-08	3.48255e-07
Bnip3	-3.6418	6.18369	1.98758e-23	2.09089e-21
Hrnr	-3.69159	3.49239	8.4802e-05	0.000980994
Lce1e	-3.70208	4.12088	8.77007e-10	2.59361e-08
Defb1	-3.71457	8.66629	1.51071e-48	9.03877e-46
Agpat4	-3.73027	4.76668	4.30777e-14	2.1367e-12
Flrt2	-3.73436	7.13605	2.32662e-29	4.36721e-27
Lipm	-3.76031	3.73389	7.48204e-18	5.19026e-16
Gsta3	-3.78296	3.20493	2.45299e-11	8.86132e-10
Defb6	-3.83967	3.88165	1.77333e-06	3.1206e-05
Ly6d	-3.88177	10.4834	1.44811e-50	1.06637e-47
Il18	-3.8873	4.4768	3.10053e-08	7.51427e-07
Gapdhs	-3.90508	2.62253	1.92435e-06	3.3498e-05
Klk13	-3.91101	3.41833	2.01399e-10	6.58017e-09
Fhl1	-3.91443	5.53928	4.90237e-26	6.09486e-24
Exo1	-3.93481	-0.0358427	0.00244768	0.0176576
Dsg1a	-3.98228	4.93968	4.87018e-05	0.000611039
Serpina3g	-4.013	1.73849	9.75989e-05	0.00110049
Dsg1b	-4.06867	5.62509	3.62432e-34	8.67391e-32
Tmem45a	-4.12414	7.65274	3.22054e-42	1.14186e-39
Lipn	-4.12818	0.584681	0.000211546	0.0021636
Figf	-4.14353	3.07155	2.04385e-13	9.54427e-12
Lce1l	-4.15653	0.60778	0.000407238	0.00381457
Rdh12	-4.23928	5.21753	3.82172e-26	4.87804e-24
Mtus1	-4.24127	3.52527	3.89824e-16	2.37693e-14
Mcoln3	-4.24324	0.681933	0.000120169	0.00132839
Ephb6	-4.26661	3.62927	3.23014e-15	1.74701e-13
Lce1f	-4.29967	3.57149	9.5866e-09	2.50745e-07
2010109I03Rik	-4.30641	0.736368	8.32776e-05	0.000965153
Lancl1	-4.32589	1.95673	0.000399447	0.00376195
Calm4	-4.37561	9.22151	1.39268e-33	3.10049e-31
Calml3	-4.37984	2.73157	1.42916e-07	3.08835e-06
Htr1b	-4.3924	-0.390862	0.00223445	0.0163911
Capns2	-4.39525	5.90968	8.00338e-53	1.09452e-49
Krtdap	-4.39975	11.7493	8.25489e-50	5.64458e-47
2310050C09Rik	-4.46881	5.46417	3.26408e-08	7.87079e-07
Ace2	-4.52433	0.923939	2.30491e-05	0.000315213
Sdr16c6	-4.53923	6.03841	5.03117e-33	1.09462e-30
Gm10638	-4.54929	2.74868	1.02852e-12	4.37602e-11
Tslp	-4.57183	4.81424	2.11178e-25	2.52701e-23
Pof1b	-4.61402	6.98421	6.63944e-45	2.88906e-42
Lipk	-4.63647	0.540882	8.0463e-05	0.000937071
Gm22692	-4.63656	-0.203908	0.00104582	0.00868312
Sdr9c7	-4.66173	2.1052	7.213e-08	1.64797e-06
NA,Serpina3h	-4.77566	4.54682	2.79515e-27	3.87796e-25
Pdzd2	-4.827	-0.0390007	0.000409193	0.0038254
Rptn	-4.84981	3.88598	2.24203e-23	2.33293e-21
Col12a1	-4.89999	0.76895	2.54089e-05	0.000343168
Cmah	-4.90075	0.0212474	0.000289798	0.00286299
Sostdc1	-4.93231	4.11092	1.08277e-12	4.58645e-11
Me3	-4.93665	0.0506114	0.000249453	0.00250054
Ms4a10	-5.03775	2.02558	5.15711e-09	1.40253e-07
Zbtb16	-5.04749	2.01389	7.06796e-08	1.62258e-06
Defb4	-5.12685	4.67536	6.27917e-43	2.40442e-40
Fam3b	-5.235	2.99041	7.87045e-16	4.56629e-14
Nebl	-5.25729	0.316683	5.41338e-05	0.000668675
Tmem45b	-5.29444	1.97162	1.41928e-07	3.07392e-06
Calm5	-5.3005	2.28485	3.52466e-09	9.75191e-08
Sod3	-5.41656	2.38052	1.27013e-11	4.73111e-10
Il33	-5.47131	4.9968	8.07822e-42	2.76189e-39
Hoxc13	-5.51133	4.85698	2.76808e-37	8.28089e-35
Dsg4	-5.81588	2.4741	9.7875e-12	3.70339e-10
Ptger3	-5.85859	2.51778	3.77817e-10	1.18197e-08
Prr9	-6.07714	9.27284	6.55673e-52	6.27676e-49
Igfbp2	-6.09442	9.65291	2.58122e-28	4.26036e-26
Krt84	-6.19974	5.80539	1.57223e-07	3.3521e-06
Il17b	-6.56502	-0.560953	0.000722592	0.00632301
Dlg2	-6.68056	-0.473608	0.000505404	0.00460784
Cabp2	-6.83029	-0.354577	0.000353962	0.00339868
Dmrt2	-6.88944	-0.31258	0.000323088	0.00315283
Slc10a6	-6.94164	2.65325	3.30161e-16	2.03912e-14
Lrrc31	-7.15252	-0.101433	0.000166195	0.00176385
Sprr2b	-7.36503	3.58049	3.08747e-27	4.22234e-25
Gli2	-7.4706	0.164868	3.16935e-05	0.000413354
Pou3f1	-8.56867	1.14212	1.71354e-08	4.31676e-07
Cables1	-9.12839	1.66378	1.55092e-10	5.13736e-09
