# Supplementary material for: MicroRNA-203 represses selection and expansion of oncogenic Hras transformed tumor initiating cells
Source: eLife. 2015 Jul 23;4:e07004. doi: 10.7554/eLife.07004 (PMC4536367; doi:10.7554/eLife.07004)
Supplement: Figure 6—source data 1. — DOI: http://dx.doi.org/10.7554/eLife.07004.013 [file elife07004s002.xlsx]

## Sheet: Gene_Lists
All genes upregulated by miR-203 ablation in primary cells (riboseq and rnaseq) and epidermis (microarray) AND downregulated by miR-203 overexpression in HF and epi (294)	All genes downregulated by miR-203 overexpression in Hair follicle and Epidermis microarrays (1704)	All genes upregulated by miR-203 ablation in primary cells (riboseq and rnaseq) and epidermis (microarray) (786)	All genes detected with Ago2 HITS-CLIP 3'UTR clusters with miR-203 seed matches (113)
AI837181	0610007P14Rik	1110008F13Rik	4930402H24Rik
Abcb6	0610009B22Rik	1110012L19Rik	AI837181
Acadsb	0610031J06Rik	1110058L19Rik	Adcy6
Adora2b	1110001J03Rik	1810022K09Rik	Ahr
Afap1l2	1110004E09Rik	2310011J03Rik	Akap12
Ahcyl2	1110004F10Rik	2310036O22Rik	Ano6
Ajuba	1110037F02Rik	Aacs	Ap1g1
Akr1b3	1110038F14Rik	Abcb6	Apc
Alg10b	1110059E24Rik	Acadsb	Arhgef2
Alg14	1810030O07Rik	Acd	Arl15
Alg6	2010111I01Rik	Acp6	Asprv1
Apc	2410127L17Rik	Acsbg1	Atp5g3
Apopt1	2510009E07Rik	Acsf3	Avl9
Arl6ip6	2610018G03Rik	Actr1b	BC017643
Atf2	2700029M09Rik	Adipor1	Bcl11b
Atp5g3	2700060E02Rik	Adora2b	Bnip2
Atp6v1c1	2700094K13Rik	Afap1l2	Cav1
Avl9	2810417H13Rik	Ahcyl2	Cbl
BC017158	3110040N11Rik	AI661453	Ccnd1
Baz1a	4632434I11Rik	AI837181	Cd81
Bcam	4933411K20Rik	Ajuba	Cdk19
Bmi1	5031439G07Rik	Akirin1	Celf1
Bnip2	6430548M08Rik	Akr1b3	Cldn12
Bpnt1	9530068E07Rik	Akr7a5	Cldn4
Bri3	9630033F20Rik	Akt1	Cmip
Btf3l4	A230046K03Rik	Aldh16a1	Col17a1
Bub3	Aasdhppt	Aldh1l2	Cul2
Capn1	Abca7	Alg10b	Dcp2
Capns2	Abcb1b	Alg14	Dlc1
Cav1	Abcb6	Alg6	Dnajb14
Cbl	Abce1	Ammecr1l	Edrf1
Ccnd1	Abcg2	Amotl1	Egr3
Ccng1	Abhd12	Anapc1	Elovl4
Cd9	Acadsb	Anapc7	Epha4
Cdk2	Acap2	Ankhd1	Ets2
Chchd6	Acer3	Ankrd10	Fem1b
Chek2	Acot9	Ankrd22	Flrt2
Chst14	Actl6a	Anxa8	Gbe1
Cinp	Actn1	Ap2a2	Gm16515
Ciz1	Actr10	Ap2b1	Hbegf
Ckmt1	Actr3	Apc	Hnrnpu
Clic1	Adam8	Apeh	Impad1
Cnbp	Adcy9	Apopt1	Itga6
Cnot11	Adh5	Arhgap17	Krt10
Cog5	Adk	Arid2	Lats2
Col17a1	Adnp	Arl6ip6	Lsm14a
Col7a1	Ado	Armc10	Mab21l3
Commd6	Adora2b	Arpc1a	Map2k4
Coro1b	Adprhl2	Ash2l	Map3k2
Coro1c	Adsl	Aspscr1	Med1
Cox7a2l	Adss	Atf2	Met
Cr1l	Aen	Atox1	Mlec
Cry1	Afap1l2	Atp1b3	Mreg
Cryzl1	Aff1	Atp5a1	Mthfr
Ctps2	Aff4	Atp5g3	Naa50
Cyb5r1	Afg3l1	Atp5l	Ndufa4l2
D1Ertd622e	Agfg1	Atp6v1c1	Necap1
Dctd	Ahcy	Atp6v1h	Nfib
Dcun1d1	Ahcyl1	Atp8b2	Nr2f2
Dda1	Ahcyl2	AU019823	Nr6a1
Ddx46	AI837181	Avl9	Nsd1
Dennd6a	Aifm1	B230219D22Rik	Nup54
Dhx36	Aig1	Babam1	Nus1
Dlg5	Aip	Bad	Ovol1
Dmd	Ajuba	Bag6	P2rx4
Dnm1l	Ak4	Banp	Pcbp1
Dpm1	Akr1b3	Baz1a	Pdzd8
Dpy19l3	Alas1	BC017158	Phlda3
Dscr3	Aldh7a1	BC017643	Pi4k2b
Dym	Alg10b	BC027231	Plag1
Dyrk1a	Alg11	Bcam	Plekha8
Efr3a	Alg13	Bckdk	Plet1
Ehd2	Alg14	Becn1	Pola1
Eif1b	Alg6	Bmi1	Prkrir
Eif3e	Alg8	Bnip2	Prl8a1
Elf2	Alkbh5	Bola1	Psap
Ercc4	Als2cl	Bpnt1	Ptpn3
Fam118b	Alyref	Braf	Ralb
Fam193a	Amacr	Bre	Rasal2
Fancb	Ambra1	Bri3	Rcan1
Fat1	Ampd3	Bri3bp	Rnd3
Fbxo11	Anapc10	Bsg	Rnf20
Foxk2	Anapc13	Btf3l4	Rpl4
Fscn1	Ankrd17	Btg2	Rreb1
Fth1	Anln	Bub3	Scamp1
Fubp1	Ano6	C1qbp	Scd2
Fxyd3	Antxr2	Cacfd1	Sema7a
Gbe1	Anxa2	Capn1	Sept2
Gins1	Ap1g1	Capns2	Sh3bgrl2
Gjb4	Ap1m1	Cav1	Sh3pxd2a
Glrx3	Ap1s2	Cbl	Sidt2
Gna13	Ap3m1	Ccdc58	Slc39a10
Golph3	Ap4b1	Ccdc61	Slc5a10
Gosr2	Apaf1	Ccdc71	Snai2
Gpr180	Apbb2	Ccnd1	Snx18
Grhl2	Apc	Ccng1	Sowahc
Grhpr	Api5	Ccs	Src
Gsk3b	Apitd1	Cd24a	Ssr3
Gusb	Apoo	Cd276	Strn
Hbegf	Apool	Cd47	Tbl1xr1
Hif1a	Apopt1	Cd9	Tmcc3
Hif1an	Appl1	Cdc42ep5	Tmem147
Higd1a	Aprt	Cdk13	Tmod3
Higd2a	Aqp3	Cdk17	Tmpo
Hint2	Arcn1	Cdk2	Tnpo1
Hscb	Arf4	Cdk7	Trp63
Hsd17b12	Arhgap11a	Cdk9	Ttc39b
Igf2bp2	Arhgap29	Cep152	Ubl3
Ikzf5	Arhgap5	Chchd6	Zc3hav1l
Itgb6	Arhgdib	Chd8	Zdhhc9
Itpk1	Arih1	Chek2	Zfp266
Jag2	Arih2	Chmp3	Zfp568
Klhl22	Arl14ep	Chst14	Zmym4
Krtcap2	Arl15	Cinp
Lama3	Arl6ip1	Cirh1a
Laptm4a	Arl6ip6	Ciz1
Lasp1	Armcx3	Ckmt1
Lgals8	Arnt	Clic1
Lima1	Arpc2	Cluh
Lmo1	Arpc3	Cnbp
Lnx2	Arpc5l	Cnih4
Lpp	Arvcf	Cnot11
Lsm2	Ascc3	Cnot6l
Ltbp1	Asf1a	Cog5
Lxn	Asns	Col17a1
Maged1	Atad5	Col7a1
Mapk6	Atf2	Commd5
Mapk8	Atf6b	Commd6
Mb21d2	Atf7ip	Cope
Mcoln1	Atg5	Coro1b
Mdh1	Atic	Coro1c
Med15	Atp11a	Cox4i1
Met	Atp5c1	Cox7a2l
Mex3c	Atp5g3	Cox8a
Mfap3	Atp5j	Cpped1
Mmachc	Atp5j2	Cr1l
Mmadhc	Atp6v1a	Crim1
Mob1a	Atp6v1c1	Crip2
Mrps22	Atpif1	Crtap
Mthfd1	Atraid	Cry1
Mtmr2	Atrx	Cryzl1
Mtpn	Atxn10	Cstb
Mtrr	Aurkb	Ctps2
Mtss1	Avl9	Ctu2
Myo19	AW209491	Cul4a
Mzt1	B3galnt2	Cyb5r1
Naa50	B630005N14Rik	Cyp1b1
Naa60	B9d1	Cyp2j6
Nae1	Bax	D10Jhu81e
Ndufa8	Baz1a	D10Wsu102e
Ndufab1	Baz1b	D15Ertd621e
Ndufb2	Bbs5	D1Ertd622e
Ndufc1	Bbx	Dcaf11
Net1	BC017158	Dctd
Nfu1	Bcam	Dcun1d1
Nit2	Bcar1	Dda1
Nln	Bccip	Ddah1
Nme4	Bcl11b	Ddr1
Nradd	Bcl9l	Ddx46
Nsdhl	Bcr	Deb1
Nudt1	Bet1	Dennd6a
Nudt21	Bhlhb9	Dgcr2
Nufip2	Birc5	Dhrs13
Nxt2	Bivm	Dhrs4
Oat	Blmh	Dhx36
Oaz1	Bmi1	Dirc2
Orc4	Bmpr2	Dlg5
Pafah1b2	Bnc2	Dlx2
Pagr1a	Bnip2	Dmd
Park7	Bnip3	Dnm1l
Pcbd2	Bola3	Dpm1
Pcbp2	Bpnt1	Dpp8
Pcsk6	Brca1	Dpy19l3
Pdcl3	Bri3	Dscr3
Pgam5	Btf3l4	Dstyk
Phc3	Bub1	Dym
Pias2	Bub1b	Dyrk1a
Pinx1	Bub3	Dyrk2
Plscr3	C1d	Dzip1l
Pola1	C330027C09Rik	Ecd
Pold3	Cab39	Echdc2
Pon2	Cacybp	Eef1b2
Ppap2c	Calu	Eef2
Ppp2cb	Camk2g	Efhd2
Prkcdbp	Capn1	Efna1
Prmt6	Capn2	Efr3a
Prps2	Capns2	Ehd2
Psma1	Caprin1	Eif1b
Psmf1	Capza1	Eif3e
Psmg2	Capza2	Eif3k
Ptp4a1	Car12	Eif3l
Pttg1ip	Cask	Eif4e2
Pus3	Casp6	Eif4enif1
Pwp1	Casp7	Eif6
Pxn	Casp8	Elf2
Rab24	Casp8ap2	Emc10
Rab34	Cat	Emg1
Rap1b	Cav1	Eral1
Rapgef1	Cbfb	Ercc1
Rasa1	Cbl	Ercc4
Rbm26	Cbr2	Ereg
Rbmxl1	Cbr3	Ergic3
Rbpj	Cbr4	Esrp2
Rchy1	Cbwd1	Eva1a
Rcn1	Cbx1	Exoc7
Rfc3	Ccar1	Exog
Rnf38	Ccdc101	Exosc1
Rpap2	Ccdc107	Eya3
Scrn3	Ccdc127	F11r
Sec13	Ccdc50	Fabp5
Sec24d	Ccna2	Fam118b
Sec61b	Ccnb2	Fam168b
Sept2	Ccnd1	Fam173a
Serhl	Ccnd3	Fam173b
Sf3b5	Ccng1	Fam188a
Sh3bgrl	Ccnh	Fam193a
Sh3pxd2b	Cct6a	Fam219b
Sidt2	Cd109	Fam64a
Slc12a2	Cd81	Fam83f
Slc12a4	Cd9	Fancb
Slc29a3	Cdc16	Fance
Slc2a1	Cdc20	Fat1
Slc38a2	Cdc25b	Fbxo11
Slc39a10	Cdc26	Fbxo28
Slc7a6	Cdc27	Fbxo6
Smim8	Cdc42se2	Fbxw9
Smpd4	Cdc45	Fdx1
Smtnl2	Cdc6	Fgd6
Snai2	Cdca2	Fgfr2
Snapc3	Cdca4	Fhl2
Snrpb2	Cdca8	Fkbp15
Snrpc	Cdh3	Fntb
Snrpg	Cdk1	Foxk2
Snx18	Cdk2	Foxn3
Snx9	Cdk5rap1	Foxo4
Specc1	Cdk5rap3	Fscn1
Sra1	Cdk6	Fth1
Srbd1	Cdkn2aipnl	Fubp1
Srpk1	Cdkn3	Fxyd3
Srpk2	Cdt1	Fyco1
Srprb	Celf1	Fzd10
Srsf5	Cenpa	Gbe1
Ssbp2	Cenpe	Gbf1
Ssbp3	Cenph	Gemin7
Surf4	Cenpl	Gfer
Swi5	Cep164	Gga3
Tada1	Cep55	Gin1
Taf1d	Cep68	Gins1
Tax1bp3	Cers5	Gjb2
Tbc1d1	Cers6	Gjb4
Tbc1d8b	Cetn3	Gle1
Tcof1	Chac2	Glmn
Tes	Chaf1b	Glrx3
Tex261	Chchd1	Gls
Tiprl	Chchd5	Gltscr2
Tmem126a	Chchd6	Gna13
Tmem18	Chek2	Gna15
Tmem242	Cherp	Gnas
Tmx2	Chm	Gnb2
Tnks	Chrac1	Golph3
Tnpo1	Chst14	Gorasp1
Tnrc6a	Ciapin1	Gosr2
Tpp2	Cinp	Gpank1
Tprkb	Cisd2	Gpi1
Trappc6a	Ciz1	Gpr108
Trim26	Ckmt1	Gpr180
Trim27	Cks1b	Grcc10
Trim28	Cks2	Grhl2
Tsc2	Clic1	Grhpr
Tsn	Clock	Gsk3b
Tspan3	Clptm1l	Gusb
Tubgcp3	Clstn1	Gxylt1
Uba3	Cmc2	H2-K1
Ube2d2a	Cmtm7	Hbegf
Usp32	Cnbp	Hdgf
Vapb	Cnot11	Hectd3
Vasp	Cnot6	Hif1a
Vopp1	Cnpy2	Hif1an
Vprbp	Cnpy3	Higd1a
Vps29	Cobll1	Higd2a
Wdr77	Cog3	Hint2
Xpnpep3	Cog4	Hnrnpf
Xrn2	Cog5	Hook3
Yars2	Cog6	Hps3
Yeats2	Coil	Hps5
Ythdf3	Col16a1	Hs6st1
Zc3h7b	Col17a1	Hscb
Zcchc17	Col18a1	Hsd17b12
Zdhhc16	Col7a1	Hspa4l
Zfand3	Commd1	Hspb1
Zfp281	Commd10	Htra1
Zfp503	Commd3	Idh3g
Zfp532	Commd6	Ier3
Zmym4	Copa	Ifnar1
	Copg1	Ifnar2
	Copg2	Ift172
	Cops3	Ift43
	Cops4	Ift46
	Cops5	Ift52
	Cops7b	Igf1r
	Coq7	Igf2bp2
	Coro1b	Igsf9
	Coro1c	Ikzf5
	Cox10	Il6st
	Cox15	Ilf3
	Cox5a	Ilk
	Cox7a2l	Ing5
	Cpne3	Inppl1
	Cpne8	Ints2
	Cpox	Irx5
	Cr1l	Itgb6
	Creb1	Itpk1
	Creb3	Itpr3
	Crk	Ivd
	Crlf2	Jag2
	Cry1	Kcmf1
	Cryzl1	Kdelc2
	Csde1	Kdelr1
	Cse1l	Klc1
	Csrp1	Klf5
	Cstf2	Klhl22
	Cstf2t	Krit1
	Ctbp2	Krtcap2
	Ctcf	Krtdap
	Ctdspl2	Lage3
	Cth	Lama3
	Ctnnal1	Lama5
	Ctnnb1	Lamb1
	Ctnnbip1	Laptm4a
	Ctps2	Las1l
	Cttnbp2nl	Lasp1
	Cul2	Lcmt2
	Cul3	Ldlr
	Cwf19l2	Lgals8
	Cyb561d2	Lima1
	Cyb5b	Limd1
	Cyb5r1	Lmo1
	Cycs	Lmo4
	Cyfip1	Lnx2
	D16Ertd472e	Lpp
	D17Wsu104e	Lrig1
	D1Ertd622e	Lrrc41
	D6Wsu163e	Lrrc42
	Dad1	Lsm2
	Dbf4	Ltbp1
	Dcaf13	Lxn
	Dcaf15	Lypla2
	Dcakd	Lztr1
	Dck	Mafb
	Dclre1b	Maged1
	Dcp2	Malsu1
	Dcps	Manbal
	Dctd	Map7d1
	Dcun1d1	Mapk6
	Dda1	Mapk8
	Ddost	Mapre1
	Ddt	Mastl
	Ddx10	Mb21d2
	Ddx17	Mcee
	Ddx20	Mcl1
	Ddx46	Mcoln1
	Ddx50	Mdh1
	Defb1	Med11
	Degs1	Med15
	Dek	Med20
	Dennd6a	Med29
	Depdc1a	Med9
	Derl2	Megf8
	Dgkz	Met
	Dguok	Mettl2
	Dhcr7	Mex3c
	Dhfr	Mfap3
	Dhodh	Mgrn1
	Dhx36	Mia3
	Dhx9	Mical2
	Diablo	Mif
	Dimt1	Miip
	Dis3	Mink1
	Dkc1	Mmachc
	Dlg5	Mmadhc
	Dlk2	Mob1a
	Dmd	Mob1b
	Dnaja3	Mob2
	Dnajb11	Mocs3
	Dnajb6	Mrpl23
	Dnajc14	Mrpl50
	Dnajc15	Mrps18a
	Dnajc16	Mrps18b
	Dnajc2	Mrps21
	Dnajc21	Mrps22
	Dnajc24	Mrps34
	Dnajc5	Mrps6
	Dnajc7	Msrb1
	Dnm1l	Mt1
	Dnmt1	Mtf1
	Dnmt3a	Mthfd1
	Dnmt3b	Mtmr14
	Dnttip1	Mtmr2
	Dock11	Mtpn
	Dock7	Mtrr
	Dock9	Mtss1
	Donson	Mut
	Dph2	Myo19
	Dpm1	Mzt1
	Dpp3	Naa25
	Dpy19l3	Naa50
	Dpy30	Naa60
	Dr1	Nabp2
	Drosha	Nae1
	Dscr3	Ncapg
	Dsn1	Nck2
	Dtl	Ncoa4
	Dtnbp1	Ndfip1
	Dtwd1	Ndrg1
	Dtymk	Ndst1
	Dut	Ndufa8
	Dym	Ndufab1
	Dynll1	Ndufaf1
	Dynll2	Ndufb2
	Dyrk1a	Ndufb5
	E2f8	Ndufc1
	Echs1	Ndufs2
	Ecsit	Nek9
	Efr3a	Net1
	Egfr	Nfkbib
	Ehd1	Nfu1
	Ehd2	Nfyb
	Ei24	Nit2
	Eid1	Nln
	Eif1b	Nme4
	Eif2d	Noc3l
	Eif2s1	Noc4l
	Eif2s2	Nosip
	Eif3a	Npdc1
	Eif3e	Npepl1
	Eif3g	Nradd
	Eif3m	Nsdhl
	Eif4e	Nt5dc2
	Eif4ebp1	Nt5dc3
	Elf1	Nudt1
	Elf2	Nudt21
	Elk3	Nufip2
	Elmo2	Nup153
	Elof1	Nupl2
	Elovl5	Nxt2
	Emc2	Oat
	Emd	Oaz1
	Emp1	Orc4
	Enah	Oxa1l
	Enkd1	Oxct1
	Eny2	Oxnad1
	Eogt	Pafah1b2
	Epb4.1l2	Pagr1a
	Epb4.1l3	Pank1
	Epha1	Pard6g
	Ephx1	Park7
	Ercc4	Pcbd2
	Ercc5	Pcbp1
	Ercc6l	Pcbp2
	Ergic1	Pcif1
	Ergic2	Pcsk6
	Eri2	Pdcl3
	Eri3	Pde12
	Esf1	Pea15a
	Esyt2	Pes1
	Ets1	Pet100
	Ewsr1	Pex16
	Exo1	Pfdn5
	Exoc8	Pgam5
	Exosc10	Pgap2
	Exosc3	Phc3
	Exosc7	Phyhip
	Exosc8	Pias1
	Exosc9	Pias2
	Ext1	Pick1
	Ezh2	Pinx1
	Fah	Pithd1
	Faim	Plekhb2
	Fam111a	Plekhg5
	Fam118b	Plgrkt
	Fam120a	Plk1
	Fam172a	Plp2
	Fam193a	Plscr3
	Fam216a	Plxnb1
	Fam76b	Pola1
	Fam83d	Pold3
	Fam96a	Poldip2
	Fancb	Polr2f
	Fanci	Polr3f
	Farp1	Pon2
	Farp2	Porcn
	Fastkd2	Pou3f1
	Fat1	Ppap2c
	Fbln2	Ppard
	Fbxl19	Ppdpf
	Fbxl5	Ppip5k2
	Fbxo11	Ppp1r11
	Fbxo31	Ppp1r13l
	Fbxw8	Ppp1r14b
	Fem1b	Ppp2cb
	Fermt2	Ppp2r5e
	Fgfbp1	Pprc1
	Fgfr1op2	Pqlc1
	Fhl1	Prkcdbp
	Filip1l	Prkd2
	Fkbp11	Prkdc
	Fkbp5	Prmt6
	Fkbp8	Prpf3
	Flna	Prps2
	Fmr1	Psap
	Fndc3b	Psma1
	Fnip1	Psmb10
	Foxk2	Psmb2
	Fra10ac1	Psmd10
	Fscn1	Psmf1
	Fst	Psmg2
	Fth1	Ptbp2
	Fubp1	Ptp4a1
	Fubp3	Ptplb
	Fundc1	Pttg1ip
	Fus	Pus3
	Fxyd3	Pvrl2
	Fyttd1	Pvrl4
	Fzr1	Pwp1
	G3bp1	Pxn
	G3bp2	Qars
	Gabarapl1	Rab10
	Gabpa	Rab11b
	Galk2	Rab24
	Galnt7	Rab34
	Gatad1	Rab5c
	Gbe1	Rabep2
	Gemin2	Rap1b
	Gfpt1	Rapgef1
	Ggct	Rasa1
	Ggcx	Rbck1
	Ggta1	Rbm26
	Gins1	Rbmxl1
	Gins2	Rbpj
	Gins4	Rcbtb2
	Gipc1	Rce1
	Git2	Rchy1
	Gjb4	Rcn1
	Glce	Relb
	Glod4	Rexo2
	Glrx3	Rfc3
	Glud1	Rheb
	Gm2a	Rnf114
	Gmds	Rnf139
	Gmfb	Rnf145
	Gmnn	Rnf38
	Gmpr2	Rnf41
	Gmps	Rnmtl1
	Gna11	Rpap2
	Gna13	Rpl18
	Gnai1	Rpl18a
	Gnai3	Rpl31
	Gng10	Rpl35
	Gnl3l	Rpl7a
	Gnpat	Rpl8
	Gnpnat1	Rplp2
	Golgb1	Rps11
	Golim4	Rps19
	Golph3	Rps27l
	Gorasp2	Rps5
	Gosr2	Rps7
	Gpatch2l	Rraga
	Gpatch4	Rragc
	Gpr180	Rtkn
	Gpr56	Rtn4
	Gpr87	Sac3d1
	Gpsm2	Samd4
	Gpx8	Samd5
	Grhl2	Sapcd2
	Grhpr	Sbno1
	Grip1	Scaf4
	Grsf1	Scamp3
	Gsg2	Scap
	Gsk3b	Scd1
	Gsn	Scnm1
	Gsta4	Scrn3
	Gstcd	Sdc2
	Gstm2	Sec13
	Gtf2b	Sec24b
	Gtf2e1	Sec24d
	Gtf2f1	Sec61b
	Gtf2f2	Secisbp2l
	Gtf2h2	Sept2
	Gtf2h3	Serhl
	Gtf3c4	Serinc5
	Gusb	Serpinb5
	Gyg	Setd3
	Gzf1	Setd6
	H2afv	Setdb1
	H2afz	Sf3a1
	Hadhb	Sf3b3
	Hars2	Sf3b5
	Hat1	Sfxn3
	Haus1	Sh3bgrl
	Haus2	Sh3pxd2b
	Haus3	Shisa5
	Haus4	Sidt2
	Haus6	Slc12a2
	Haus7	Slc12a4
	Haus8	Slc12a9
	Hax1	Slc25a1
	Hbegf	Slc25a10
	Hdac1	Slc29a3
	Heatr2	Slc2a1
	Heatr5a	Slc35f5
	Heatr6	Slc38a2
	Hebp1	Slc39a10
	Hells	Slc7a3
	Helq	Slc7a6
	Hif1a	Smim8
	Hif1an	Smpd4
	Higd1a	Smtnl2
	Higd2a	Snai2
	Hint1	Snapc3
	Hint2	Snapin
	Hint3	Snrpb2
	Hira	Snrpc
	Hk1	Snrpe
	Hmgn3	Snrpg
	Hmmr	Snx18
	Hmox1	Snx33
	Hnrnph3	Snx9
	Hnrnpul2	Sox4
	Hook1	Spats2l
	Hoxa1	Specc1
	Hpgds	Spryd3
	Hprt	Sra1
	Hs2st1	Srbd1
	Hscb	Srpk1
	Hsd17b12	Srpk2
	Hsd17b7	Srprb
	Hsf2	Srsf5
	Hspa13	Ssbp2
	Hspa14	Ssbp3
	Hspa4	St3gal2
	Hspa5	Stk11ip
	Hspa9	Strap
	Hspe1	Surf4
	Htatip2	Swi5
	Htatsf1	Sys1
	Htra2	Tada1
	Hus1	Taf15
	Iah1	Taf1d
	Icam1	Tarbp2
	Idh3a	Tax1bp1
	Idi1	Tax1bp3
	Ier3ip1	Tbc1d1
	Ier5l	Tbc1d8b
	Ift27	Tbrg1
	Ift74	Tcof1
	Ift81	Tdp2
	Igf2bp2	Tecr
	Igfbp3	Telo2
	Ikbip	Tenm4
	Ikzf5	Tes
	Il1rl2	Tex261
	Impa1	Tfe3
	Ing1	Tfg
	Inpp5f	Tfpt
	Ipo11	Tgif1
	Ipo8	Thbd
	Iqgap3	Tiam1
	Irak2	Tiprl
	Ireb2	Tm2d3
	Isoc1	Tmc6
	Itch	Tmcc3
	Itfg1	Tmed4
	Itgb6	Tmem109
	Itpa	Tmem126a
	Itpk1	Tmem160
	Itsn1	Tmem18
	Ivns1abp	Tmem192
	Iws1	Tmem234
	Jag2	Tmem242
	Jak1	Tmem39a
	Jmjd6	Tmem51
	Jun	Tmem79
	Kcnk1	Tmx2
	Kctd18	Tmx3
	Kdelc1	Tnfaip3
	Kdelr2	Tnks
	Khdrbs1	Tnpo1
	Kif20a	Tnrc6a
	Kif22	Tnrc6b
	Kif23	Tom1l2
	Kif2a	Tpd52l2
	Kif4	Tpp2
	Kif5b	Tprgl
	Klhl22	Tprkb
	Klhl23	Tra2a
	Klhl9	Trabd
	Kpna2	Trappc2l
	Kpnb1	Trappc6a
	Krcc1	Trappc9
	Krt17	Triap1
	Krt5	Trim11
	Krtcap2	Trim26
	l7Rn6	Trim27
	Lactb2	Trim28
	Lama3	Trip10
	Lamp2	Trmt5
	Lamtor2	Trmt61a
	Lamtor3	Trmu
	Lancl1	Trp53
	Laptm4a	Tsc2
	Larp4	Tsn
	Larp7	Tsnax
	Lasp1	Tspan3
	Lats2	Tspo
	Lcmt1	Tsr3
	Ldha	Tsta3
	Ldlrap1	Ttc14
	Leo1	Ttc39c
	Letm1	Ttc9c
	Lgals8	Tti1
	Lgals9	Tubgcp3
	Lias	Txnl4a
	Lig1	Uba3
	Lima1	Ube2b
	Limk1	Ube2d2a
	Lims1	Ube2d3
	Lman1	Ube2z
	Lmo1	Ubn2
	Lnx2	Ubxn7
	Lpar2	Ubxn8
	Lpp	Uckl1
	Lrp12	Unc119b
	Lrp6	Uqcrc1
	Lrrc40	Urm1
	Lrrc47	Use1
	Lrrc8c	Usp22
	Lrrcc1	Usp3
	Lrwd1	Usp32
	Lsg1	Utp23
	Lsm12	Uxt
	Lsm14a	Vapb
	Lsm2	Vasp
	Lsm3	Vcan
	Lsm5	Vezf1
	Lsm6	Vkorc1
	Lsm7	Vopp1
	Lta4h	Vprbp
	Ltbp1	Vps18
	Ltbp4	Vps29
	Luzp1	Vwa1
	Lxn	Vwa8
	Ly6e	Vwa9
	Macc1	Wdr11
	Mad2l2	Wdr24
	Maged1	Wdr4
	Magoh	Wdr77
	Magohb	Wdr83
	Mall	Wipi1
	Manf	Xpnpep3
	Maoa	Xpo5
	Map2	Xrn2
	Map2k5	Yars2
	Map4k5	Yeats2
	Mapk6	Yipf4
	Mapk8	Yrdc
	Mapk9	Ythdf3
	Mapkap1	Zbtb1
	Mat2a	Zbtb39
	Matr3	Zbtb43
	Mb21d2	Zbtb8a
	Mbip	Zc3h7b
	Mbnl1	Zcchc17
	Mbnl2	Zdhhc16
	Mboat2	Zdhhc5
	Mbtps1	Zfand2b
	Mcm10	Zfand3
	Mcm2	Zfp207
	Mcm4	Zfp263
	Mcm6	Zfp281
	Mcm7	Zfp503
	Mcm8	Zfp532
	Mcmbp	Zfp687
	Mcoln1	Zfp710
	Mdh1	Zmat3
	Mdh2	Zmym4
	Me2	Znhit2
	Meaf6
	Mecp2
	Med13
	Med14
	Med15
	Med18
	Med21
	Memo1
	Met
	Mettl4
	Mettl5
	Mex3c
	Mfap3
	Mff
	Mfsd10
	Mgea5
	Mina
	Minos1
	Mis12
	Mis18a
	Mis18bp1
	Mitd1
	Mkl1
	Mknk1
	Mlh1
	Mmachc
	Mmadhc
	Mnat1
	Mob1a
	Mon1b
	Morc4
	Morf4l2
	Moxd1
	Mpc1
	Mpg
	Mphosph8
	Mpv17
	Mpzl2
	Mre11a
	Mrpl10
	Mrpl18
	Mrpl35
	Mrpl36
	Mrpl40
	Mrpl41
	Mrpl42
	Mrpl47
	Mrps14
	Mrps15
	Mrps18c
	Mrps22
	Mrps24
	Mrps5
	Mrps9
	Msantd4
	Msh2
	Msh6
	Msi2
	Msl2
	Mterfd1
	Mterfd2
	Mtf2
	Mthfd1
	Mtmr10
	Mtmr2
	Mtpap
	Mtpn
	Mtrr
	Mtss1
	Mtx2
	Mum1
	Mvb12a
	Myadm
	Mybl2
	Myo19
	Myof
	Mzt1
	N6amt1
	N6amt2
	Naa15
	Naa38
	Naa40
	Naa50
	Naa60
	Nae1
	Naga
	Nanp
	Nap1l1
	Nap1l4
	Narfl
	Nars
	Nasp
	Nbn
	Ncapd2
	Ncapd3
	Ncapg2
	Ncaph
	Ncl
	Ncstn
	Ndn
	Ndnl2
	Ndrg3
	Ndufa1
	Ndufa12
	Ndufa2
	Ndufa8
	Ndufab1
	Ndufaf2
	Ndufaf4
	Ndufaf7
	Ndufb2
	Ndufb6
	Ndufc1
	Ndufs3
	Necap1
	Nedd9
	Nek6
	Nelfa
	Nelfe
	Nenf
	Net1
	Nf2
	Nfatc2ip
	Nfatc3
	Nfib
	Nfic
	Nfix
	Nfkb1
	Nfu1
	Nid1
	Nif3l1
	Nipsnap3b
	Nit2
	Nln
	Nme4
	Nme7
	Nol10
	Nol7
	Nolc1
	Nop14
	Nop58
	Nr3c1
	Nradd
	Nrf1
	Nrm
	Nsdhl
	Nsmce2
	Nsmce4a
	Nt5c2
	Nt5c3
	Ntpcr
	Nubp2
	Nucb2
	Nucks1
	Nudcd1
	Nudcd2
	Nudt1
	Nudt2
	Nudt21
	Nudt4
	Nudt5
	Nuf2
	Nufip2
	Nup107
	Nup133
	Nup160
	Nup188
	Nup205
	Nup35
	Nup37
	Nupl1
	Nus1
	Nxn
	Nxt2
	Oard1
	Oat
	Oaz1
	Ola1
	Orc1
	Orc2
	Orc3
	Orc4
	Orc6
	Ormdl1
	Otub1
	Otud1
	P4ha2
	Pafah1b2
	Pafah2
	Pagr1a
	Paics
	Paip1
	Panx1
	Papd5
	Papss1
	Papss2
	Parg
	Park7
	Parp12
	Parp2
	Parp8
	Parpbp
	Pawr
	Paxip1
	Pbdc1
	Pbk
	Pcbd2
	Pcbp2
	Pccb
	Pcmt1
	Pcna
	Pcnp
	Pcsk6
	Pcyt1a
	Pdap1
	Pdcd10
	Pdcl3
	Pde6d
	Pdhx
	Pdia6
	Pdk3
	Pdlim1
	Pdlim5
	Pdp2
	Pdpk1
	Pds5b
	Pdzd11
	Pdzd8
	Pecr
	Pef1
	Peg3
	Pex2
	Pfas
	Pfdn1
	Pfdn4
	Pfkl
	Pfkp
	Pgam5
	Pgk1
	Pgp
	Phax
	Phc3
	Phf14
	Phf2
	Phf6
	Phgdh
	Phip
	Phldb1
	Pias2
	Picalm
	Piga
	Pigc
	Pigf
	Pigs
	Pih1d1
	Pik3c2a
	Pik3r4
	Pinx1
	Pip4k2c
	Pitpna
	Pitpnb
	Pja2
	Pkm
	Pla2g4a
	Plch2
	Pld2
	Plrg1
	Pls3
	Plscr3
	Plxdc2
	Pmpcb
	Pnn
	Poc1a
	Pola1
	Pola2
	Polb
	Pold1
	Pold2
	Pold3
	Pole
	Pole4
	Polk
	Polr2b
	Polr2d
	Polr2g
	Polr3e
	Polr3k
	Pon2
	Pon3
	Pop4
	Pou2f1
	Ppap2c
	Ppat
	Pphln1
	Ppic
	Ppil1
	Ppil4
	Ppm1d
	Ppp1r12a
	Ppp1r12c
	Ppp1r14c
	Ppp1r2
	Ppp1r7
	Ppp2cb
	Ppp2r3a
	Ppp3r1
	Ppp6r3
	Pqlc3
	Prc1
	Prdx4
	Prelid1
	Prim1
	Prim2
	Prkaca
	Prkacb
	Prkag2
	Prkar1a
	Prkcdbp
	Prkci
	Prkx
	Prmt1
	Prmt2
	Prmt6
	Prorsd1
	Prpf19
	Prpf39
	Prpf4
	Prpf40a
	Prps1
	Prps2
	Psip1
	Psma1
	Psma2
	Psma3
	Psma4
	Psma5
	Psma7
	Psmb5
	Psmc6
	Psmd12
	Psmd5
	Psmd6
	Psmd9
	Psmf1
	Psmg1
	Psmg2
	Pspc1
	Ptbp1
	Ptcd2
	Ptgr1
	Ptgr2
	Ptms
	Ptp4a1
	Ptp4a2
	Ptpn21
	Ptpn9
	Ptprf
	Ptprs
	Ptrf
	Ptrh2
	Pttg1
	Pttg1ip
	Pus3
	Pus7
	Pvr
	Pwp1
	Pxdn
	Pxn
	Qdpr
	Qk
	Qser1
	Qsox1
	Rab24
	Rab31
	Rab34
	Rab8a
	Rabep1
	Rabgap1l
	Racgap1
	Rad1
	Rad50
	Rad51
	Rad51ap1
	Rad9a
	Ralb
	Ralgps2
	Raly
	Ran
	Ranbp1
	Ranbp2
	Rangap1
	Rap1a
	Rap1b
	Rap2a
	Rapgef1
	Rapgef6
	Rarg
	Rasa1
	Rbbp4
	Rbbp5
	Rbbp7
	Rbl1
	Rbm12
	Rbm25
	Rbm26
	Rbm27
	Rbm28
	Rbm45
	Rbms1
	Rbmxl1
	Rbpj
	Rcc1
	Rchy1
	Rcn1
	Rcn2
	Rdx
	Recql
	Rfc1
	Rfc2
	Rfc3
	Rfc4
	Rfc5
	Rgs19
	Rhoa
	Rhobtb3
	Rhod
	Rif1
	Riok3
	Rlf
	Rlim
	Rmdn1
	Rmi1
	Rnaseh2b
	Rnaseh2c
	Rnf10
	Rnf141
	Rnf168
	Rnf169
	Rnf2
	Rnf20
	Rnf25
	Rnf34
	Rnf38
	Rnpc3
	Rock2
	Rp2h
	Rp9
	Rpa1
	Rpap2
	Rpap3
	Rpl7l1
	Rpn1
	Rpp14
	Rpp30
	Rpp40
	Rps24
	Rps6ka1
	Rps6ka3
	Rps6ka6
	Rptor
	Rpusd4
	Rrbp1
	Rrm1
	Rrp1
	Rsf1
	Rsrc1
	Rsu1
	Rtca
	Ruvbl1
	Ruvbl2
	Rwdd4a
	Rxra
	Ryk
	S100a14
	Saal1
	Sap30l
	Sar1a
	Scamp1
	Scoc
	Scrn3
	Scyl1
	Sde2
	Sdf2l1
	Sdhaf2
	Sdhd
	Sec11a
	Sec11c
	Sec13
	Sec23b
	Sec24d
	Sec61b
	Selk
	Sema3c
	Sema5a
	Senp2
	Sep15
	Sephs1
	Sept10
	Sept2
	Sept6
	Sept7
	Sergef
	Serhl
	Serp1
	Serpinb6a
	Serpine2
	Serpinh1
	Sertad4
	Sestd1
	Setd2
	Setd5
	Sf3b5
	Sgpl1
	Sh3bgrl
	Sh3bgrl2
	Sh3bp1
	Sh3pxd2a
	Sh3pxd2b
	Shc1
	Shcbp1
	Shoc2
	Sidt2
	Sike1
	Siva1
	Ska2
	Ska3
	Skiv2l2
	Skp2
	Slbp
	Slc12a2
	Slc12a4
	Slc12a6
	Slc1a4
	Slc20a1
	Slc25a12
	Slc25a15
	Slc25a28
	Slc29a3
	Slc2a1
	Slc38a2
	Slc39a10
	Slc39a9
	Slc7a6
	Slco3a1
	Sltm
	Smad5
	Smap1
	Smarca2
	Smarcal1
	Smarcd2
	Smc2
	Smc3
	Smc4
	Smc5
	Smc6
	Smchd1
	Smim8
	Smn1
	Smo
	Smpd2
	Smpd4
	Smtnl2
	Smyd3
	Snai2
	Snap23
	Snap29
	Snap47
	Snapc3
	Snrnp27
	Snrnp40
	Snrnp70
	Snrpb2
	Snrpc
	Snrpd3
	Snrpf
	Snrpg
	Sntb2
	Snupn
	Snw1
	Snx1
	Snx18
	Snx5
	Snx7
	Snx9
	Sp1
	Sp3
	Spag5
	Spag9
	Sparc
	Spc24
	Spc25
	Spcs2
	Spcs3
	Specc1
	Spns1
	Spred1
	Sptbn1
	Sra1
	Srbd1
	Src
	Srebf2
	Srek1
	Srp72
	Srp9
	Srpk1
	Srpk2
	Srprb
	Srsf1
	Srsf10
	Srsf11
	Srsf2
	Srsf3
	Srsf5
	Srsf6
	Srsf9
	Ssb
	Ssbp2
	Ssbp3
	Ssr2
	Ssr3
	Ssu72
	St13
	Stard3nl
	Stard4
	Stil
	Stk25
	Stk3
	Stk39
	Ston2
	Strada
	Stx12
	Stx18
	Stxbp3a
	Stxbp5
	Stxbp6
	Suclg2
	Sumo1
	Sumo3
	Surf4
	Suz12
	Swi5
	Syap1
	Syce2
	Syncrip
	Tacc3
	Tada1
	Tada2a
	Tada2b
	Taf11
	Taf12
	Taf1d
	Taf2
	Taf7
	Tapbpl
	Tax1bp3
	Tbc1d1
	Tbc1d10a
	Tbc1d19
	Tbc1d8b
	Tbca
	Tbck
	Tbk1
	Tbpl1
	Tcea1
	Tceal8
	Tcerg1
	Tcf19
	Tcf3
	Tcof1
	Tecpr1
	Tefm
	Terf1
	Tes
	Tex261
	Tex30
	Tfam
	Tfdp1
	Tgfbr1
	Tgs1
	Thoc1
	Thrap3
	Thyn1
	Tia1
	Timm9
	Timp3
	Tipin
	Tiprl
	Tk1
	Tlk1
	Tlk2
	Tma16
	Tmco1
	Tmed3
	Tmem123
	Tmem126a
	Tmem129
	Tmem165
	Tmem167
	Tmem18
	Tmem201
	Tmem209
	Tmem219
	Tmem242
	Tmem245
	Tmem248
	Tmem43
	Tmem55a
	Tmem69
	Tmem9
	Tmf1
	Tmod3
	Tmpo
	Tmx1
	Tmx2
	Tnfrsf12a
	Tnfrsf22
	Tnks
	Tnpo1
	Tnpo3
	Tnrc6a
	Tomm7
	Tonsl
	Top2a
	Top2b
	Topbp1
	Tpi1
	Tpm2
	Tpm4
	Tpp2
	Tpr
	Tprkb
	Tra2b
	Tradd
	Traf2
	Traf6
	Tram1
	Trappc11
	Trappc12
	Trappc13
	Trappc6a
	Trim13
	Trim23
	Trim26
	Trim27
	Trim28
	Trim59
	Trim8
	Trip13
	Trmt11
	Trnau1ap
	Trp53bp1
	Trp63
	Tsc2
	Tsc22d3
	Tsen15
	Tsfm
	Tsn
	Tspan3
	Tspan5
	Tssc4
	Ttc3
	Ttc33
	Ttc4
	Ttc7
	Ttk
	Ttl
	Ttll4
	Tuba1a
	Tubb4b
	Tubg1
	Tubgcp3
	Tubgcp5
	Tulp3
	Tvp23b
	Twf2
	Txlna
	Txndc17
	Txndc9
	Txnl1
	Tyms
	U2af1
	U2af2
	Uba2
	Uba3
	Ubac2
	Ube2d2a
	Ube2e3
	Ube2k
	Ube2s
	Ube2t
	Ube3a
	Ublcp1
	Ubr1
	Ufc1
	Ugdh
	Ugp2
	Uhrf1
	Unc13d
	Ung
	Upf3a
	Uri1
	Usp1
	Usp14
	Usp16
	Usp32
	Usp45
	Utp15
	Utp3
	Vamp4
	Vapa
	Vapb
	Vasp
	Vav3
	Vcl
	Vdac3
	Vegfa
	Vimp
	Vopp1
	Vprbp
	Vps13d
	Vps16
	Vps25
	Vps29
	Vps35
	Vps36
	Vps4b
	Vrk1
	Vsnl1
	Vwa2
	Vwa5a
	Wac
	Wapal
	Wdhd1
	Wdr35
	Wdr44
	Wdr5
	Wdr6
	Wdr61
	Wdr77
	Wdr91
	Wdr92
	Wipf2
	Wls
	Wnt7b
	Wrnip1
	Wsb1
	Wwp1
	Wwp2
	Xbp1
	Xpnpep3
	Xpot
	Xrcc4
	Xrcc6
	Xrn2
	Yae1d1
	Yaf2
	Yars2
	Ydjc
	Yeats2
	Yes1
	Yipf1
	Yipf5
	Yod1
	Ythdc2
	Ythdf3
	Ywhae
	Ywhah
	Ywhaq
	Zbtb41
	Zc3h14
	Zc3h15
	Zc3h18
	Zc3h7b
	Zcchc17
	Zcchc8
	Zdhhc16
	Zdhhc6
	Zdhhc9
	Zfand1
	Zfand3
	Zfp148
	Zfp191
	Zfp266
	Zfp275
	Zfp281
	Zfp282
	Zfp296
	Zfp326
	Zfp386
	Zfp451
	Zfp503
	Zfp512
	Zfp518b
	Zfp52
	Zfp532
	Zfp592
	Zfp617
	Zfp64
	Zfp644
	Zfp771
	Zfp81
	Zfpl1
	Zfx
	Zkscan17
	Zkscan3
	Zmiz1
	Zmpste24
	Zmym4
	Zmynd11
	Zmynd19
	Znhit1
	Znhit3
	Znhit6
	Zranb2
	Zswim8
	Zwilch
	Zyg11b
	Zyx

## Sheet: combined meta-analysis
GO terms
All genes upregulated by miR-203 ablation in primary cells (riboseq and rnaseq) and epidermis (microarray) AND downregulated by miR-203 overexpression
GO (biological process)
Term	Genes	P-value (adjusted)
GO:0033554~cellular response to stress	NUDT1, VAPB, POLA1, CHEK2, CCND1, HIF1A, GSK3B, PRMT6, MAPK8, CRY1, ERCC4, TNRC6A, XRN2, FANCB, APC	0.9129549279613893
GO:0070271~protein complex biogenesis	MTMR2, MTSS1, CAV1, SEPT2, PSMG2, PCBD2, LNX2, TNPO1, APC, TES	0.9642863992100212
GO:0006461~protein complex assembly	MTMR2, MTSS1, CAV1, SEPT2, PSMG2, PCBD2, LNX2, TNPO1, APC, TES	0.9642863992100212
GO:0043933~macromolecular complex subunit organization	SRPK2, MTSS1, CAV1, SEPT2, PCBD2, LNX2, MTMR2, PSMG2, LSM2, TNPO1, XRN2, TES, APC	0.9331576377127365
GO:0031116~positive regulation of microtubule polymerization	CAV1, APC, TES	0.9392543360782962
GO:0031112~positive regulation of microtubule polymerization or depolymerization	CAV1, APC, TES	0.9392543360782962
GO:0065003~macromolecular complex assembly	MTMR2, SRPK2, MTSS1, CAV1, SEPT2, PSMG2, PCBD2, LNX2, LSM2, TNPO1, APC, TES	0.9037850108601349
GO:0007595~lactation	CCND1, CAV1, MET, TES	0.8777957275077591
GO:0030334~regulation of cell migration	GNA13, LAMA3, HIF1A, PTP4A1, HBEGF, APC	0.848184741070699
GO:0046716~muscle maintenance	HIF1A, DMD, APC	0.8168481190809282
GO:0031113~regulation of microtubule polymerization	CAV1, APC, TES	0.8339741962142202
GO:0030865~cortical cytoskeleton organization	CORO1C, LASP1, EHD2	0.8495654410710581
GO:0008285~negative regulation of cell proliferation	CD9, CAV1, WDR77, TSC2, RBPJ, TAX1BP3, FTH1, APC, TES	0.8293308090714568
GO:0030335~positive regulation of cell migration	HIF1A, PTP4A1, HBEGF, APC	0.819718793336915
GO:0001837~epithelial to mesenchymal transition	HIF1A, TRIM28, RBPJ	0.8147699475817054
GO:0051270~regulation of cell motion	GNA13, LAMA3, HIF1A, PTP4A1, HBEGF, APC	0.8226327904539619
GO:0040012~regulation of locomotion	GNA13, LAMA3, HIF1A, PTP4A1, HBEGF, APC	0.8345510956223756
GO:0051272~positive regulation of cell motion	HIF1A, PTP4A1, HBEGF, APC	0.8166320571422947
GO:0006974~response to DNA damage stimulus	CCND1, NUDT1, PRMT6, POLA1, CHEK2, CRY1, ERCC4, FANCB, XRN2, APC	0.8121183635701988
GO:0040017~positive regulation of locomotion	HIF1A, PTP4A1, HBEGF, APC	0.8380652486930297
GO:0016071~mRNA metabolic process	SRPK2, DDX46, EIF3E, SNRPB2, NUDT21, LSM2, SF3B5, SRPK1, XRN2, SNRPG	0.8635894532066508
GO:0032273~positive regulation of protein polymerization	CAV1, APC, TES	0.8618857042328584
GO:0006397~mRNA processing	SRPK2, DDX46, SNRPB2, NUDT21, LSM2, SF3B5, SRPK1, XRN2, SNRPG	0.8818294676576737
GO:0048193~Golgi vesicle transport	VPS29, COG5, SEC13, SEC24D	0.9004093169130837
GO:0009165~nucleotide biosynthetic process	NME4, DCTD, MTHFD1, ATP6V1C1, CTPS2, ATP5G3, PRPS2	0.8900239237020504
GO:0030856~regulation of epithelial cell differentiation	CCND1, CAV1, APC	0.8867631726180347
GO:0010035~response to inorganic substance	CCND1, CAV1, PPP2CB, MAPK8, PARK7	0.8966820552876165
GO:0034404~nucleobase, nucleoside and nucleotide biosynthetic process	NME4, DCTD, MTHFD1, ATP6V1C1, CTPS2, ATP5G3, PRPS2	0.8880869865017283
GO:0034654~nucleobase, nucleoside, nucleotide and nucleic acid biosynthetic process	NME4, DCTD, MTHFD1, ATP6V1C1, CTPS2, ATP5G3, PRPS2	0.8880869865017283
GO:0007010~cytoskeleton organization	CORO1C, MTSS1, TUBGCP3, LIMA1, LASP1, FAT1, EHD2, PXN, VASP, TES	0.8803480699429177
GO:0030155~regulation of cell adhesion	LAMA3, HSD17B12, JAG2, RASA1, APC	0.8856392284186853
GO:0007093~mitotic cell cycle checkpoint	CCND1, PSMG2, APC	0.8802187315125738
GO:0031334~positive regulation of protein complex assembly	CAV1, APC, TES	0.8802187315125738
GO:0032271~regulation of protein polymerization	CAV1, RASA1, APC, TES	0.882311992288413
GO:0010741~negative regulation of protein kinase cascade	CAV1, TSC2, APC	0.882583858877342
GO:0006984~ER-nuclear signaling pathway	CCND1, VAPB, GSK3B	0.882583858877342
GO:0007243~protein kinase cascade	GNA13, SRPK2, CAV1, MET, TSC2, MAPK8, SRPK1, PXN	0.8851023309704992
GO:0051493~regulation of cytoskeleton organization	LIMA1, CAV1, RASA1, APC, TES	0.8848803593051985
GO:0034976~response to endoplasmic reticulum stress	CCND1, VAPB, GSK3B	0.8775989417812442
GO:0051495~positive regulation of cytoskeleton organization	CAV1, APC, TES	0.8775989417812442
GO:0030178~negative regulation of Wnt receptor signaling pathway	CCND1, TAX1BP3, APC	0.8775989417812442
GO:0043066~negative regulation of apoptosis	BMI1, GSK3B, PPP2CB, DPM1, MAPK8, SNAI2, RASA1, APC	0.8781431892005337
GO:0019725~cellular homeostasis	TMX2, GLRX3, CD9, CAV1, HIF1A, SLC12A2, DMD, FTH1, PARK7, APC	0.8770611473096401
GO:0006821~chloride transport	SLC12A2, SLC12A4, CLIC1, TES	0.8723756027692164
GO:0000320~re-entry into mitotic cell cycle	CCND1, GSK3B	0.8666821605252429
GO:0000278~mitotic cell cycle	CCND1, SEPT2, UBA3, POLA1, CCNG1, CDK2, BUB3, APC	0.8699187808168397
GO:0043069~negative regulation of programmed cell death	BMI1, GSK3B, PPP2CB, DPM1, MAPK8, SNAI2, RASA1, APC	0.8699187808168397
GO:0001568~blood vessel development	GNA13, CAV1, HIF1A, HBEGF, RBPJ, RAPGEF1, RASA1, NSDHL	0.8699187808168397
GO:0031110~regulation of microtubule polymerization or depolymerization	CAV1, APC, TES	0.8708720078674039
GO:0060548~negative regulation of cell death	BMI1, GSK3B, PPP2CB, DPM1, MAPK8, SNAI2, RASA1, APC	0.8658865882252611
GO:0034621~cellular macromolecular complex subunit organization	SRPK2, MTSS1, SEPT2, PSMG2, LSM2, TNPO1, XRN2, TES	0.8658865882252611
GO:0008283~cell proliferation	GINS1, CCND1, GSK3B, SRA1, MET, POLA1, RAP1B, PARK7	0.8682466212266398
GO:0043254~regulation of protein complex assembly	CAV1, RASA1, APC, TES	0.8744602581670262
GO:0001944~vasculature development	GNA13, CAV1, HIF1A, HBEGF, RBPJ, RAPGEF1, RASA1, NSDHL	0.8712851386212896
GO:0008380~RNA splicing	SRPK2, DDX46, SNRPB2, LSM2, SF3B5, SRPK1, SNRPG	0.8693137317442501
GO:0046777~protein amino acid autophosphorylation	TRIM28, MET, DYRK1A, TES	0.86660312408806
GO:0043623~cellular protein complex assembly	MTSS1, SEPT2, PSMG2, TNPO1, TES	0.8618987887315082
GO:0033043~regulation of organelle organization	LIMA1, CAV1, PSMG2, RASA1, APC, TES	0.8580282777364464
GO:0006259~DNA metabolic process	GINS1, POLD3, RFC3, NUDT1, CINP, PRMT6, POLA1, CRY1, ERCC4, FANCB, XRN2	0.8850354282701887
GO:0006091~generation of precursor metabolites and energy	ATP6V1C1, GBE1, NDUFA8, NDUFAB1, NDUFC1, ATP5G3, MDH1, NDUFB2	0.8854868080646463
GO:0042127~regulation of cell proliferation	BMI1, CAV1, CNBP, JAG2, TAX1BP3, FTH1, CD9, TSC2, WDR77, HBEGF, RBPJ, TES, APC	0.8880670521984158
GO:0051259~protein oligomerization	MTMR2, CAV1, PCBD2, LNX2	0.8897430410574001
GO:0016310~phosphorylation	SRPK2, MET, TRIM28, CHEK2, ATP5G3, SRPK1, CDK2, PXN, ATP6V1C1, CCND1, MAPK6, GSK3B, DYRK1A, TNKS, MAPK8, TES	0.8921114180057841
GO:0030036~actin cytoskeleton organization	CORO1C, MTSS1, LIMA1, FAT1, EHD2, VASP	0.889433958752548
GO:0046907~intracellular transport	VPS29, SNX9, COG5, GSK3B, TSC2, SEC13, DSCR3, MCOLN1, GOSR2, TNPO1, SEC24D	0.8873137011607738
GO:0034622~cellular macromolecular complex assembly	SRPK2, MTSS1, SEPT2, PSMG2, LSM2, TNPO1, TES	0.890831455395181
GO:0044265~cellular macromolecule catabolic process	CBL, VPRBP, NAE1, PSMA1, DCUN1D1, EIF3E, UBA3, PPP2CB, PIAS2, DDA1, LSM2, XRN2, USP32, FBXO11	0.8947153913950242
GO:0070507~regulation of microtubule cytoskeleton organization	CAV1, APC, TES	0.8921329657605888
GO:0007049~cell cycle	SEPT2, CINP, POLA1, CHEK2, CCNG1, CDK2, NAE1, CCND1, MAPK6, GSK3B, PTP4A1, UBA3, BUB3, APC	0.891262749037166
GO:0042981~regulation of apoptosis	BMI1, JAG2, SNAI2, HIF1A, PSMG2, GSK3B, PPP2CB, DPM1, MAPK8, DLG5, TEX261, RASA1, APC	0.8878739359317024
GO:0055114~oxidation reduction	ACADSB, CYB5R1, NDUFA8, HSD17B12, NDUFAB1, NDUFC1, GRHPR, FTH1, NDUFB2, MTHFD1, HIF1AN, AKR1B3, MDH1, NSDHL, CRYZL1	0.8881485899690433
GO:0007094~mitotic cell cycle spindle assembly checkpoint	PSMG2, APC	0.8848490042006951
GO:0030857~negative regulation of epithelial cell differentiation	CCND1, CAV1	0.8848490042006951
GO:0045841~negative regulation of mitotic metaphase/anaphase transition	PSMG2, APC	0.8848490042006951
GO:0060770~negative regulation of epithelial cell proliferation involved in prostate gland development	WDR77, APC	0.8848490042006951
GO:0006281~DNA repair	NUDT1, PRMT6, POLA1, CRY1, ERCC4, FANCB, XRN2	0.8845607148448934
GO:0043067~regulation of programmed cell death	BMI1, JAG2, SNAI2, HIF1A, PSMG2, GSK3B, PPP2CB, DPM1, MAPK8, DLG5, TEX261, RASA1, APC	0.8898828604969791
GO:0022405~hair cycle process	AKT1, PPARD, LAMA5, RBPJ, NSDHL, APC	0.717077
GO:0007242~intracellular signaling cascade	GNA13, GNA15, CAV1, ADORA2B, NDST1, EFNA1, RAB5C, RTKN, CHEK2, FOXO4, PXN, MIF, AKT1, TRIAP1, TIAM1, RAB11B, RAB24, MT1, DYRK2, RAPGEF1, CDC42EP5, NET1, TRP53, PGAP2, SRPK2, BRAF, PICK1, MET, ADIPOR1, MINK1, PEA15A, TAX1BP3, SRPK1, PRKD2, CCND1, CNIH4, GSK3B, RAB34, TSC2, BRE, RHEB, MAPK8, GNAS, RAP1B, PIAS1, RAB10	0.735379
GO:0001841~neural tube formation	LMO4, TSC2, IFT172, TGIF1, IFT52, VASP	0.733766
GO:0048009~insulin-like growth factor receptor signaling pathway	AKT1, IGF1R, TSC2	0.730036
GO:0006281~DNA repair	TRP53, NUDT1, POLA1, PRKDC, UBE2B, EYA3, CUL4A, PRMT6, FBXO6, BRE, CRY1, ERCC4, ERCC1, XRN2, FANCB	0.727747
GO:0070647~protein modification by small protein conjugation or removal	BMI1, AKT1, NOSIP, MGRN1, KCMF1, UBA3, PIAS2, USP22, RNF41	0.724843
GO:0042303~molting cycle	AKT1, PPARD, LAMA5, RBPJ, NSDHL, APC	0.740722
GO:0042633~hair cycle	AKT1, PPARD, LAMA5, RBPJ, NSDHL, APC	0.740722
GO:0000075~cell cycle checkpoint	TRP53, CCND1, PSMG2, BRE, FOXO4, APC	0.740722
GO:0009144~purine nucleoside triphosphate metabolic process	NME4, ATP6V1C1, NUDT1, ATP1B3, ATP5L, ATP6V1H, ATP8B2, ATP5A1, ATP5G3	0.74948
GO:0018105~peptidyl-serine phosphorylation	AKT1, GSK3B, PRKDC, TNKS	0.750863
GO:0030031~cell projection assembly	KLF5, NCK2, MTSS1, LAMA5, IFT172, UBE2B, PXN	0.748481
GO:0015986~ATP synthesis coupled proton transport	ATP6V1C1, ATP5L, ATP6V1H, ATP5A1, ATP5G3	0.752471
GO:0015985~energy coupled proton transport, down electrochemical gradient	ATP6V1C1, ATP5L, ATP6V1H, ATP5A1, ATP5G3	0.752471
GO:0043009~chordate embryonic development	GNA13, FGFR2, TRP53, SETDB1, BMI1, GINS1, NDST1, LMO4, PRKDC, UBE2B, VASP, AKT1, DLX2, CHD8, HIF1A, IFT172, TSC2, TGIF1, HBEGF, HS6ST1, GNAS, IFT52, CR1L, NSDHL	0.752822
GO:0031112~positive regulation of microtubule polymerization or depolymerization	CAV1, APC, TES	0.761303
GO:0031116~positive regulation of microtubule polymerization	CAV1, APC, TES	0.761303
GO:0001838~embryonic epithelial tube formation	LMO4, TSC2, IFT172, TGIF1, IFT52, VASP	0.759213
GO:0006413~translational initiation	EIF3E, EIF3K, EIF3L, EIF1B, EIF4E2	0.765059
GO:0007034~vacuolar transport	VPS29, USE1, DSCR3, HOOK3	0.761645
GO:0009896~positive regulation of catabolic process	AKT1, BECN1, NDFIP1, APC	0.761645
GO:0009792~embryonic development ending in birth or egg hatching	GNA13, FGFR2, TRP53, SETDB1, BMI1, GINS1, NDST1, LMO4, PRKDC, UBE2B, VASP, AKT1, DLX2, CHD8, HIF1A, IFT172, TSC2, TGIF1, HBEGF, HS6ST1, GNAS, IFT52, CR1L, NSDHL	0.762572
GO:0007067~mitosis	ANAPC1, SEPT2, CCNG1, CDK2, SAC3D1, PLK1, NEK9, ANAPC7, MAPRE1, PES1, BUB3, APC, TXNL4A	0.774674
GO:0000280~nuclear division	ANAPC1, SEPT2, CCNG1, CDK2, SAC3D1, PLK1, NEK9, ANAPC7, MAPRE1, PES1, BUB3, APC, TXNL4A	0.774674
GO:0030850~prostate gland development	FGFR2, IGF1R, PSAP, SERPINB5, WDR77	0.777212
GO:0030111~regulation of Wnt receptor signaling pathway	CCND1, CHD8, SOX4, TAX1BP3, APC	0.777212
GO:0007049~cell cycle	SEPT2, POLA1, CHEK2, CCNG1, FOXO4, SAC3D1, BUB3, APC, TRP53, ANAPC1, CINP, BANP, CDK7, UBE2B, FOXN3, CDK2, NAE1, CCND1, EREG, MAPK6, PLK1, PTP4A1, GSK3B, UBA3, TBRG1, NEK9, MAPRE1, ANAPC7, USP22, PARD6G, PES1, TXNL4A	0.778616
GO:0030334~regulation of cell migration	RTN4, GNA13, LAMA3, HIF1A, LAMA5, PTP4A1, HBEGF, APC	0.775118
GO:0009260~ribonucleotide biosynthetic process	NME4, ATP6V1C1, ATP1B3, ATP5L, ATP6V1H, ATP8B2, ATP5A1, ATP5G3, PRPS2	0.771501
GO:0006119~oxidative phosphorylation	ATP6V1C1, UQCRC1, ATP5L, ATP6V1H, ATP5A1, ATP5G3	0.770006
GO:0031334~positive regulation of protein complex assembly	CAV1, CD24A, APC, TES	0.768879
GO:0042060~wound healing	FNTB, GNA13, PPARD, ANXA8, THBD, HIF1A, HPS5, MTPN, HBEGF	0.775472
GO:0009206~purine ribonucleoside triphosphate biosynthetic process	NME4, ATP6V1C1, ATP1B3, ATP5L, ATP6V1H, ATP8B2, ATP5A1, ATP5G3	0.77357
GO:0009201~ribonucleoside triphosphate biosynthetic process	NME4, ATP6V1C1, ATP1B3, ATP5L, ATP6V1H, ATP8B2, ATP5A1, ATP5G3	0.77357
GO:0048146~positive regulation of fibroblast proliferation	FNTB, EREG, TGIF1	0.770486
GO:0046716~muscle maintenance	HIF1A, DMD, APC	0.770486
GO:0019725~cellular homeostasis	TMX2, TRP53, GLRX3, CAV1, GNA15, PPARD, SLC12A2, ATOX1, TMX3, CD24A, TECR, PARK7, FTH1, CD9, SERINC5, HIF1A, DMD, MT1, POU3F1, APC	0.770536
GO:0050727~regulation of inflammatory response	CD47, ADORA2B, CD276, NDFIP1, CD24A, CR1L	0.770635
GO:0032271~regulation of protein polymerization	ARPC1A, CAV1, MAPRE1, RASA1, APC, TES	0.770635
GO:0007243~protein kinase cascade	GNA13, SRPK2, CAV1, NDST1, EFNA1, MET, PICK1, MINK1, SRPK1, PXN, AKT1, TSC2, MAPK8, PIAS1, CDC42EP5	0.774805
GO:0000087~M phase of mitotic cell cycle	ANAPC1, SEPT2, CCNG1, CDK2, SAC3D1, PLK1, NEK9, ANAPC7, MAPRE1, PES1, BUB3, APC, TXNL4A	0.772262
GO:0009145~purine nucleoside triphosphate biosynthetic process	NME4, ATP6V1C1, ATP1B3, ATP5L, ATP6V1H, ATP8B2, ATP5A1, ATP5G3	0.769356
GO:0030155~regulation of cell adhesion	DDR1, LAMA3, LAMA5, HSD17B12, JAG2, CD24A, RASA1, APC	0.769356
GO:0006984~ER-nuclear signaling pathway	TRP53, CCND1, VAPB, GSK3B	0.773354
GO:0031647~regulation of protein stability	TBRG1, PRKDC, SOX4, MTRR	0.773354
GO:0010741~negative regulation of protein kinase cascade	IGF1R, CAV1, TSC2, APC	0.773354
GO:0009165~nucleotide biosynthetic process	NME4, DCTD, MTHFD1, ATP6V1C1, ATP1B3, ATP5L, ATP6V1H, ATP8B2, CTPS2, ATP5A1, ATP5G3, PRPS2	0.770147
GO:0032268~regulation of cellular protein metabolic process	TRP53, CAV1, IGF2BP2, ANKHD1, UBE2B, CD24A, SAMD4, AKT1, TARBP2, EIF3K, RNF139, IFT52, PIAS1, TNRC6B, TNRC6A, CR1L, EIF4E2	0.767964
GO:0030098~lymphocyte differentiation	TRP53, RELB, JAG2, PRKDC, MINK1, SOX4, RBPJ, CD24A, APC	0.767644
GO:0030217~T cell differentiation	TRP53, RELB, JAG2, PRKDC, MINK1, SOX4, APC	0.765018
GO:0051052~regulation of DNA metabolic process	EYA3, TRP53, EREG, BRE, NDFIP1, UBE2B	0.762491
GO:0009142~nucleoside triphosphate biosynthetic process	NME4, ATP6V1C1, ATP1B3, ATP5L, ATP6V1H, ATP8B2, ATP5A1, ATP5G3	0.7629
GO:0009141~nucleoside triphosphate metabolic process	NME4, ATP6V1C1, NUDT1, ATP1B3, ATP5L, ATP6V1H, ATP8B2, ATP5A1, ATP5G3	0.769351
GO:0048285~organelle fission	ANAPC1, SEPT2, CCNG1, CDK2, SAC3D1, PLK1, NEK9, ANAPC7, MAPRE1, PES1, BUB3, APC, TXNL4A	0.772328
GO:0035148~tube lumen formation	LMO4, TSC2, IFT172, TGIF1, IFT52, VASP	0.770871
GO:0034220~ion transmembrane transport	ATP6V1C1, ATP5L, ATP6V1H, ATP5A1, ATP5G3	0.774678
GO:0042632~cholesterol homeostasis	CAV1, LDLR, PLSCR3, CD24A	0.772762
GO:0055092~sterol homeostasis	CAV1, LDLR, PLSCR3, CD24A	0.772762
GO:0034976~response to endoplasmic reticulum stress	TRP53, CCND1, VAPB, GSK3B	0.772762
GO:0030178~negative regulation of Wnt receptor signaling pathway	CCND1, CHD8, TAX1BP3, APC	0.772762
GO:0045070~positive regulation of viral genome replication	TARBP2, VAPB	0.772277
GO:0019048~virus-host interaction	VAPB, RRAGA	0.772277
GO:0022613~ribonucleoprotein complex biogenesis	UTP23, EIF6, TARBP2, SRPK2, EMG1, RPL7A, EXOSC1, LSM2, PTBP2, PES1	0.778824
GO:0006730~one-carbon metabolic process	MTHFD1, BTG2, LCMT2, PRMT6, ILF3, AHCYL2, ALDH1L2, TRMT61A, UBE2B	0.776289
GO:0006915~apoptosis	UBE2Z, MCL1, ZMAT3, PRKDC, RTKN, RRAGA, CD24A, AKT1, TRIAP1, SHISA5, DYRK2, TRP53, SRA1, FAM188A, BAD, PEA15A, PPP1R13L, TAX1BP1, NAE1, PDCL3, PSMG2, ZDHHC16, BNIP2, BRE, TNFAIP3	0.781355
GO:0034404~nucleobase, nucleoside and nucleotide biosynthetic process	NME4, DCTD, MTHFD1, ATP6V1C1, ATP1B3, ATP5L, ATP6V1H, ATP8B2, CTPS2, ATP5A1, ATP5G3, PRPS2	0.780043
GO:0034654~nucleobase, nucleoside, nucleotide and nucleic acid biosynthetic process	NME4, DCTD, MTHFD1, ATP6V1C1, ATP1B3, ATP5L, ATP6V1H, ATP8B2, CTPS2, ATP5A1, ATP5G3, PRPS2	0.780043
GO:0006259~DNA metabolic process	TRP53, ING5, GINS1, NUDT1, CINP, POLA1, PRKDC, UBE2B, POLD3, EYA3, GIN1, RFC3, ACD, CUL4A, TBRG1, PRMT6, BRE, FBXO6, CRY1, ERCC4, ERCC1, XRN2, FANCB	0.785802
GO:0007266~Rho protein signal transduction	GNA13, RTKN, TAX1BP3, CDC42EP5	0.784482
GO:0007032~endosome organization	VPS18, RAB5C, HOOK3	0.798414
GO:0060742~epithelial cell differentiation involved in prostate gland development	FGFR2, PSAP, WDR77	0.798414
GO:0030865~cortical cytoskeleton organization	CORO1C, LASP1, EHD2	0.798414
GO:0010165~response to X-ray	TRP53, THBD, ERCC1	0.798414
GO:0043409~negative regulation of MAPKKK cascade	IGF1R, CAV1, APC	0.798414
GO:0031110~regulation of microtubule polymerization or depolymerization	CAV1, MAPRE1, APC, TES	0.808357
GO:0007224~smoothened signaling pathway	NDST1, IFT172, IFT52, NSDHL	0.808357
GO:0042130~negative regulation of T cell proliferation	CD276, NDFIP1, GLMN, CD24A	0.808357
GO:0009205~purine ribonucleoside triphosphate metabolic process	NME4, ATP6V1C1, ATP1B3, ATP5L, ATP6V1H, ATP8B2, ATP5A1, ATP5G3	0.808233
GO:0012501~programmed cell death	UBE2Z, MCL1, ZMAT3, PRKDC, RTKN, RRAGA, CD24A, AKT1, TRIAP1, SHISA5, DYRK2, TRP53, SRA1, FAM188A, BAD, PEA15A, PPP1R13L, TAX1BP1, NAE1, PDCL3, PSMG2, ZDHHC16, BNIP2, BRE, TNFAIP3	0.812281
GO:0006754~ATP biosynthetic process	ATP6V1C1, ATP1B3, ATP5L, ATP6V1H, ATP8B2, ATP5A1, ATP5G3	0.809995
GO:0051130~positive regulation of cellular component organization	TRP53, CD47, CAV1, EREG, PLXNB1, TIAM1, CD24A, APC, TES	0.813144
GO:0009199~ribonucleoside triphosphate metabolic process	NME4, ATP6V1C1, ATP1B3, ATP5L, ATP6V1H, ATP8B2, ATP5A1, ATP5G3	0.811502
GO:0009314~response to radiation	EYA3, TRP53, THBD, BRE, PRKDC, MAPK8, CHEK2, SNAI2, ERCC4, ERCC1	0.814005
GO:0021915~neural tube development	BMI1, LMO4, TSC2, IFT172, TGIF1, IFT52, VASP	0.814914
GO:0031047~gene silencing by RNA	TARBP2, XPO5, TNRC6B, TNRC6A	0.81576
GO:0051054~positive regulation of DNA metabolic process	EYA3, EREG, BRE, UBE2B	0.81576
GO:0045732~positive regulation of protein catabolic process	AKT1, NDFIP1, APC	0.816728
GO:0060716~labyrinthine layer blood vessel development	AKT1, HS6ST1, NSDHL	0.816728
GO:0001837~epithelial to mesenchymal transition	HIF1A, TRIM28, RBPJ	0.816728
GO:0007167~enzyme linked receptor protein signaling pathway	TRP53, FGFR2, LTBP1, NDST1, EFNA1, MET, PICK1, FOXO4, AKT1, DDR1, IGF1R, EREG, TIAM1, TSC2, HBEGF, RAPGEF1	0.815364

## Sheet: miR-203 inducible analysis
GO terms
All genes downregulated by miR-203 overexpression in Hair follicle and Epidermis microarrays
GO (biological process)
Term	Genes	P-value (adjusted)
GO:0007049~cell cycle	MRPL41, SEPT2, PRC1, DBF4, AURKB, PTTG1, CDC16, CDCA8, CASP8AP2, ATF6B, CDCA2, VPS4B, TRP63, TLK1, NUP37, TLK2, TUBG1, CCNA2, DNAJC2, CCAR1, RAN, LIG1, RBL1, 4632434I11RIK, SKP2, TOPBP1, TACC3, NCAPD3, NCAPD2, UHRF1, MAPK6, SPAG5, SEPT6, MAD2L2, SEPT7, NEK6, EID1, FZR1, PPP2R3A, ANAPC13, MRE11A, TIPIN, LRRCC1, NEDD9, CEP164, ANAPC10, ANLN, CHEK2, RCC1, CCNG1, SPC24, SPC25, NCAPG2, TCF3, HELLS, TF…	2.05244e-27
GO:0006259~DNA metabolic process	XRCC4, DBF4, MORF4L2, XRCC6, PTTG1, MCM10, PRIM1, PRIM2, CRY1, DNAJC2, RBMS1, POLK, NUDT1, DTL, USP1, LIG1, POLE, TOPBP1, POLB, RMI1, RFC5, RAD1, UHRF1, RFC3, DCLRE1B, RFC4, RFC1, RFC2, SMARCAL1, XRN2, MRE11A, HUS1, TIPIN, CEP164, TK1, TRP53BP1, RNF168, ASF1A, DNMT3B, TCF3, HELLS, DNAJA3, GINS1, DNMT3A, GINS2, GINS4, CINP, BRCA1, POLD3, POLD1, POLD2, PCNA, DNMT1, CHAF1B, PARP2, KIF22, NBN, HELQ, …	2.98611e-26
GO:0000278~mitotic cell cycle	SEPT2, DBF4, CDC16, AURKB, PTTG1, LATS2, FAM83D, CDCA8, ATF6B, CDCA2, NUP37, TUBG1, USP16, DNAJC2, CCNA2, CDC6, CDK1, RAN, DSN1, SKP2, PAPD5, CDK2, NCAPD3, NCAPD2, PPM1D, CCND1, SPAG5, BUB1B, HAUS7, HAUS8, RUVBL1, MAD2L2, SEPT7, NEK6, HAUS4, HAUS3, FZR1, PPP2R3A, ANAPC13, HAUS2, CAMK2G, HAUS1, CETN3, LRRCC1, POLA1, TIPIN, NEDD9, ANLN, CEP164, ANAPC10, CEP55, RCC1, CCNG1, SPC24, SPC25, NCAPH, NCAP…	3.91693e-24
GO:0007067~mitosis	SEPT2, CDC16, AURKB, PTTG1, LATS2, FAM83D, CDCA8, ATF6B, CDCA2, NUP37, USP16, CCNA2, CDC6, CDK1, RAN, DSN1, PAPD5, NCAPD3, CDK2, NCAPD2, SPAG5, BUB1B, HAUS7, HAUS8, RUVBL1, MAD2L2, SEPT7, NEK6, HAUS4, HAUS3, FZR1, ANAPC13, HAUS2, HAUS1, CETN3, LRRCC1, TIPIN, NEDD9, ANLN, ANAPC10, CEP164, CEP55, RCC1, CCNG1, SPC24, SPC25, NCAPH, NCAPG2, BUB1, ZWILCH, HELLS, BUB3, APC, ERCC6L, TERF1, PDS5B, NUF2, C…	3.13768e-22
GO:0000280~nuclear division	SEPT2, CDC16, AURKB, PTTG1, LATS2, FAM83D, CDCA8, ATF6B, CDCA2, NUP37, USP16, CCNA2, CDC6, CDK1, RAN, DSN1, PAPD5, NCAPD3, CDK2, NCAPD2, SPAG5, BUB1B, HAUS7, HAUS8, RUVBL1, MAD2L2, SEPT7, NEK6, HAUS4, HAUS3, FZR1, ANAPC13, HAUS2, HAUS1, CETN3, LRRCC1, TIPIN, NEDD9, ANLN, ANAPC10, CEP164, CEP55, RCC1, CCNG1, SPC24, SPC25, NCAPH, NCAPG2, BUB1, ZWILCH, HELLS, BUB3, APC, ERCC6L, TERF1, PDS5B, NUF2, C…	3.13768e-22
GO:0048285~organelle fission	SEPT2, COX10, CDC16, AURKB, PTTG1, LATS2, FAM83D, CDCA8, ATF6B, CDCA2, NUP37, USP16, CCNA2, CDC6, CDK1, RAN, DSN1, PAPD5, NCAPD3, CDK2, NCAPD2, SPAG5, BUB1B, HAUS7, HAUS8, RUVBL1, MAD2L2, SEPT7, NEK6, HAUS4, HAUS3, FZR1, ANAPC13, HAUS2, HAUS1, CETN3, LRRCC1, TIPIN, NEDD9, ANLN, ANAPC10, CEP164, CEP55, RCC1, CCNG1, SPC24, SPC25, NCAPH, NCAPG2, BUB1, ZWILCH, HELLS, BUB3, APC, ERCC6L, TERF1, PDS5B, …	4.80434e-22
GO:0022403~cell cycle phase	NBN, SEPT2, DBF4, MLH1, CDC16, AURKB, PTTG1, LATS2, FAM83D, CDCA8, ATF6B, CDCA2, RANBP1, NUP37, TUBG1, USP16, DNAJC2, CCNA2, CDC6, CDK1, RAN, DSN1, SKP2, PAPD5, TOPBP1, TACC3, CDK2, NCAPD3, RAD50, RAD51, NCAPD2, CCND1, PPM1D, SPAG5, BUB1B, HAUS7, HAUS8, RUVBL1, MAD2L2, SEPT7, NEK6, HAUS4, HAUS3, FZR1, PPP2R3A, ANAPC13, CAMK2G, MRE11A, HAUS2, HAUS1, CETN3, LRRCC1, POLA1, TIPIN, NEDD9, ANLN, CEP164…	6.62128e-22
GO:0000087~M phase of mitotic cell cycle	SEPT2, CDC16, AURKB, PTTG1, LATS2, FAM83D, CDCA8, ATF6B, CDCA2, NUP37, USP16, CCNA2, CDC6, CDK1, RAN, DSN1, PAPD5, NCAPD3, CDK2, NCAPD2, SPAG5, BUB1B, HAUS7, HAUS8, RUVBL1, MAD2L2, SEPT7, NEK6, HAUS4, HAUS3, FZR1, ANAPC13, HAUS2, HAUS1, CETN3, LRRCC1, TIPIN, NEDD9, ANLN, ANAPC10, CEP164, CEP55, RCC1, CCNG1, SPC24, SPC25, NCAPH, NCAPG2, BUB1, ZWILCH, HELLS, BUB3, APC, ERCC6L, TERF1, PDS5B, NUF2, C…	7.18523e-22
GO:0051301~cell division	BMI1, SEPT2, PRC1, CDC16, AURKB, PTTG1, LATS2, FAM83D, CDCA8, CDC45, VPS4B, CDCA2, NUP37, USP16, CCNA2, TOP2A, CDC6, CDK1, RAN, ROCK2, DSN1, LIG1, CDK6, PAPD5, CDK2, NCAPD3, NCAPD2, CCND1, CCND3, SPAG5, BUB1B, HAUS7, HAUS8, RUVBL1, SEPT6, MAD2L2, SEPT7, NEK6, HAUS4, HAUS3, CKS1B, FZR1, ANAPC13, HAUS2, HAUS1, CETN3, LRRCC1, TIPIN, NEDD9, ANLN, CEP164, ANAPC10, CEP55, RCC1, CCNG1, SPC24, SPC25, NCA…	2.38384e-21
GO:0022402~cell cycle process	SEPT2, DBF4, CDC16, PTTG1, AURKB, CDCA8, ATF6B, CDCA2, NUP37, TUBG1, DNAJC2, CCNA2, RAN, SKP2, 4632434I11RIK, TOPBP1, TACC3, NCAPD3, NCAPD2, SPAG5, MAD2L2, SEPT7, NEK6, FZR1, PPP2R3A, ANAPC13, MRE11A, LRRCC1, TIPIN, NEDD9, ANLN, CEP164, ANAPC10, CCNG1, RCC1, SPC24, SPC25, NCAPG2, TCF3, HELLS, ERCC6L, TFDP1, NUF2, SYCE2, CDC20, CDC26, CDC27, BRCA1, NBN, MLH1, LATS2, FAM83D, RANBP1, USP16, CDC6, CD…	1.3026e-20
GO:0000279~M phase	NBN, SEPT2, MLH1, CDC16, AURKB, PTTG1, LATS2, FAM83D, CDCA8, ATF6B, CDCA2, RANBP1, NUP37, TUBG1, USP16, CCNA2, CDC6, CDK1, RAN, DSN1, PAPD5, TOPBP1, TACC3, CDK2, RAD50, NCAPD3, RAD51, NCAPD2, SPAG5, BUB1B, HAUS7, HAUS8, RUVBL1, MAD2L2, SEPT7, NEK6, HAUS4, HAUS3, FZR1, ANAPC13, HAUS2, MRE11A, HAUS1, CETN3, LRRCC1, TIPIN, NEDD9, ANLN, CEP164, ANAPC10, CEP55, RCC1, CCNG1, RPA1, SPC24, SPC25, NCAPH, …	1.43473e-20
GO:0006260~DNA replication	DBF4, MCM10, CDT1, PRIM1, CDC45, MCM8, MCM7, PRIM2, DNAJC2, RBMS1, POLK, CDC6, RBBP4, DTL, LIG1, POLE, POLB, PAPD5, MCM2, RBBP7, MCM4, RMI1, MCM6, RAD51, RFC5, RFC3, RFC4, RFC1, RFC2, RRM1, WRNIP1, TIPIN, POLA1, NFIX, POLA2, TK1, RPA1, DNAJA3, TERF1, GINS1, GINS2, NASP, CINP, GINS4, BRCA1, POLD3, POLD1, POLD2, PCNA, NFIC, CHAF1B, NFIB	2.43026e-15
GO:0006974~response to DNA damage stimulus	KIF22, XRCC4, NBN, MORF4L2, XRCC6, MLH1, PTTG1, ANKRD17, FANCI, HMOX1, AEN, PRMT6, TRP63, NSMCE2, PARG, TLK1, TLK2, CRY1, FANCB, CDK1, POLK, NUDT1, DTL, USP1, LIG1, POLE, GTF2H3, POLB, TOPBP1, GTF2H2, RAD50, RAD51, RAD1, UHRF1, CCND1, DCLRE1B, BAZ1B, RIF1, RUVBL2, XRN2, UNG, WRNIP1, MRE11A, HUS1, POLA1, TIPIN, BCCIP, CEP164, CHEK2, RPA1, PRPF19, ERCC5, TRP53BP1, RNF168, ERCC4, ASF1A, APC, TRIP13,…	2.31181e-15
GO:0033554~cellular response to stress	XRCC4, KIF22, PXDN, NBN, VAPB, MORF4L2, XRCC6, MLH1, PTTG1, ANKRD17, ATG5, FANCI, HMOX1, AEN, PRMT6, TRP63, NSMCE2, PARG, TLK1, CAT, TLK2, CRY1, FANCB, POLK, CDK1, NUDT1, DTL, USP1, LIG1, POLE, GTF2H3, POLB, TOPBP1, GTF2H2, RAD50, RAD51, RAD1, UHRF1, CCND1, HIF1A, DCLRE1B, BAZ1B, RIF1, EIF2S1, MAPK9, MAPK8, RUVBL2, XRN2, SERP1, DERL2, UNG, WRNIP1, MRE11A, HUS1, POLA1, TIPIN, CEP164, BCCIP, CHEK2,…	7.53841e-14
GO:0006281~DNA repair	KIF22, XRCC4, NBN, XRCC6, MORF4L2, MLH1, PTTG1, ANKRD17, FANCI, PRMT6, NSMCE2, CRY1, FANCB, POLK, NUDT1, LIG1, USP1, POLE, GTF2H3, TOPBP1, POLB, RAD50, GTF2H2, RAD51, RAD1, UHRF1, DCLRE1B, RUVBL2, XRN2, UNG, MRE11A, WRNIP1, HUS1, POLA1, BCCIP, CEP164, PRPF19, RPA1, TRP53BP1, ERCC5, RNF168, ERCC4, ASF1A, TRIP13, EXO1, MSH6, RAD51AP1, MSH2, SMC5, SMC6, BRCA1, SMC3, ATRX, MPG, POLD1, PCNA, PARP2, CH…	1.89846e-11
GO:0046907~intracellular transport	COPA, ENAH, HTATIP2, AP1G1, BNIP3, CASK, AIP, HOOK1, AP1S2, DYNLL2, TIMM9, VPS4B, MCOLN1, RANBP1, RANBP2, VPS16, TPR, SEC24D, SAR1A, KPNB1, NUP133, KIF5B, RAN, SNUPN, PRKCI, IPO8, ERGIC1, FLNA, ERGIC2, COPG2, SCYL1, 0610009B22RIK, ARCN1, SRP72, KPNA2, SRP9, SEC23B, VPS29, STON2, ARL6IP1, SNX9, AP1M1, DERL2, NUP160, MTX2, BET1, DSCR3, SNX1, GIPC1, POLA2, LMAN1, STX12, TOMM7, CSE1L, STX18, AP3M1, C…	3.6015e-09
GO:0016071~mRNA metabolic process	RALY, LSM6, U2AF2, SNRPD3, LSM7, MLH1, SYNCRIP, SKIV2L2, PNN, DCPS, PLRG1, DNAJB11, LSM5, U2AF1, MAGOHB, LSM3, LSM2, DDX20, TSEN15, ZCCHC8, SRPK2, MAGOH, PTBP1, MTPAP, PRPF39, MBNL1, CSTF2T, PRPF4, SMN1, SRPK1, QK, VEGFA, CELF1, SNRNP40, SNRPF, XRN2, 1110037F02RIK, SNRPG, SSU72, THOC1, PPIL1, TRA2B, SNRPB2, SF3B5, NAA38, PRPF19, EXOSC10, DDX46, EIF3E, NUDT21, SNRNP70, RBM28, RBM25, PRPF40A, CSTF2…	4.46707e-08
GO:0006397~mRNA processing	RALY, LSM6, U2AF2, SNRPD3, LSM7, MLH1, SYNCRIP, SKIV2L2, PNN, PLRG1, LSM5, U2AF1, MAGOHB, LSM3, LSM2, DDX20, TSEN15, ZCCHC8, SRPK2, MAGOH, PTBP1, MTPAP, PRPF39, MBNL1, CSTF2T, PRPF4, SMN1, SRPK1, QK, CELF1, SNRNP40, SNRPF, XRN2, 1110037F02RIK, SNRPG, SSU72, THOC1, TRA2B, PPIL1, SNRPB2, SF3B5, NAA38, PRPF19, DDX46, NUDT21, SNRNP70, RBM28, RBM25, PRPF40A, CSTF2, SNW1, SLBP, JMJD6, RSRC1, ZRANB2, PO…	6.46259e-08
GO:0006396~RNA processing	RALY, CHERP, LSM6, SNRPD3, U2AF2, LSM7, UTP15, SYNCRIP, MLH1, SKIV2L2, PNN, DCAF13, PLRG1, DKC1, U2AF1, LSM5, MAGOHB, RPP30, LSM3, LSM2, DDX20, TGS1, CDK5RAP1, TSEN15, ZCCHC8, SRPK2, EXOSC8, RRP1, EXOSC9, EXOSC7, MAGOH, PTBP1, MTPAP, PRPF39, EXOSC3, MBNL1, CSTF2T, PRPF4, SRPK1, SMN1, QK, TRMT11, LARP7, CELF1, SNRNP40, SNRPF, XRN2, 1110037F02RIK, SSU72, C1D, THOC1, SNRPG, PUS3, PPIL1, TRA2B, SNRPB…	9.22951e-08
GO:0008104~protein localization	AP1G1, CASK, CTNNB1, AIP, HOOK1, VPS13D, TIMM9, VPS4B, RAB24, NUP37, NUP35, SAR1A, SCAMP1, NUP133, RAN, MECP2, TACC3, NUPL1, WDR92, COPG2, SEC61B, SRP72, ARL6IP1, SNX9, DERL2, CAV1, SNX5, MTX2, SNX7, SNX1, GIPC1, LMAN1, STX12, TOMM7, CSE1L, STX18, TRAM1, RAB8A, NUF2, RABEP1, ARF4, TSC2, PCNA, SEC13, YIPF5, GOSR2, STXBP3A, COPA, GRIP1, NUP188, MITD1, AP1S2, DNAJC14, NECAP1, RANBP2, VPS16, TPR, SEC…	1.2322e-07
GO:0008380~RNA splicing	RALY, LSM6, PPIL1, U2AF2, SNRPD3, TRA2B, SNRPB2, LSM7, SYNCRIP, SKIV2L2, SF3B5, NAA38, PNN, PRPF19, DDX46, PLRG1, LSM5, U2AF1, MAGOHB, LSM3, DDX20, LSM2, SNRNP70, RBM28, ZCCHC8, PRPF40A, SRPK2, MAGOH, PTBP1, PRPF39, SNW1, MBNL1, PRPF4, SMN1, SRPK1, QK, JMJD6, RSRC1, ZRANB2, CELF1, SNRNP40, SNRPF, SNRNP27, 1110037F02RIK, THOC1, SNRPG	6.50175e-07
GO:0045184~establishment of protein localization	AP1G1, CASK, AIP, HOOK1, TIMM9, VPS4B, RAB24, NUP37, NUP35, SAR1A, SCAMP1, NUP133, RAN, NUPL1, COPG2, SEC61B, SRP72, ARL6IP1, SNX9, DERL2, SNX5, MTX2, SNX7, SNX1, GIPC1, LMAN1, STX12, TOMM7, CSE1L, STX18, TRAM1, RAB8A, RABEP1, ARF4, TSC2, PCNA, SEC13, YIPF5, GOSR2, STXBP3A, COPA, NUP188, MITD1, AP1S2, DNAJC14, NECAP1, VPS16, RANBP2, TPR, SEC24D, KPNB1, KDELR2, SNUPN, IPO8, FLNA, SENP2, STXBP5, AR…	7.10416e-07
GO:0015031~protein transport	AP1G1, CASK, AIP, HOOK1, TIMM9, VPS4B, RAB24, NUP37, NUP35, SAR1A, SCAMP1, NUP133, RAN, NUPL1, COPG2, SEC61B, SRP72, ARL6IP1, SNX9, DERL2, SNX5, MTX2, SNX7, SNX1, GIPC1, LMAN1, STX12, TOMM7, CSE1L, STX18, TRAM1, RAB8A, RABEP1, ARF4, TSC2, PCNA, SEC13, YIPF5, GOSR2, STXBP3A, COPA, NUP188, MITD1, AP1S2, DNAJC14, NECAP1, VPS16, RANBP2, TPR, SEC24D, KPNB1, KDELR2, SNUPN, IPO8, SENP2, STXBP5, ARCN1, N…	1.81015e-06
GO:0051276~chromosome organization	BMI1, ENY2, NBN, MORF4L2, EZH2, HIRA, NAP1L1, BNIP3, CTCF, PTTG1, CBX1, NAP1L4, SMARCD2, H2AFV, ATF6B, PRMT6, H2AFZ, TLK1, TLK2, USP16, TOP2A, RBBP4, AIFM1, RBL1, MECP2, MCM2, RBBP7, NCAPD3, NCAPD2, SUZ12, BAZ1A, BAZ1B, SMARCAL1, RUVBL2, RUVBL1, RNF20, SMARCA2, UTP3, MEAF6, HAT1, NR3C1, RPA1, NCAPH, NCAPG2, CENPA, RNF168, ACTL6A, ASF1A, TCF3, DNMT3B, HELLS, BUB3, APC, TERF1, DNMT3A, PDS5B, SMCHD1…	1.86579e-06
GO:0006310~DNA recombination	EXO1, MSH6, XRCC4, NBN, RAD51AP1, MSH2, LIG1, UNG, HUS1, XRCC6, SMC5, SMC6, MLH1, TOPBP1, RAD51, RPA1, RECQL, BCL11B, NSMCE2, RUVBL2, RUVBL1, TCF3, XRN2, TRIP13	8.38147e-06
GO:0034613~cellular protein localization	COPA, AP1G1, CASK, CTNNB1, AIP, AP1S2, TIMM9, VPS16, TPR, SEC24D, SAR1A, KPNB1, RAN, SNUPN, IPO8, FLNA, WDR92, COPG2, ARCN1, SRP72, KPNA2, SEC23B, SRP9, ARL6IP1, STON2, SNX9, DERL2, AP1M1, MTX2, PPP3R1, SNX1, GIPC1, POLA2, STX12, TOMM7, CSE1L, AP3M1, STX18, CHM, TNPO1, HSPA9, IPO11, STRADA, YWHAE, COG3, YWHAH, GSK3B, BAX, TSC2, PCNA, YWHAQ, NOP58, GOSR2, AP4B1, SSR3	3.8078e-05
GO:0070727~cellular macromolecule localization	COPA, AP1G1, CASK, CTNNB1, AIP, AP1S2, TIMM9, VPS16, TPR, SEC24D, SAR1A, KPNB1, RAN, SNUPN, IPO8, FLNA, WDR92, COPG2, ARCN1, SRP72, KPNA2, SEC23B, SRP9, ARL6IP1, STON2, SNX9, DERL2, AP1M1, MTX2, PPP3R1, SNX1, GIPC1, POLA2, STX12, TOMM7, CSE1L, AP3M1, STX18, CHM, TNPO1, HSPA9, IPO11, STRADA, YWHAE, COG3, YWHAH, GSK3B, BAX, TSC2, PCNA, YWHAQ, NOP58, GOSR2, AP4B1, SSR3	4.56671e-05
GO:0043933~macromolecular complex subunit organization	MTSS1, ENAH, SEPT2, HPRT, COX10, CAPZA2, LNX2, NAP1L1, MLH1, NAP1L4, GTF2E1, PICALM, H2AFV, GSN, H2AFZ, LSM2, TUBG1, USP16, TUBA1A, KPNB1, TBPL1, COX15, SRPK2, PCBD2, MBNL1, IPO8, MCM2, GTF2B, FLNA, SMN1, TAF11, SPAG9, TAF12, PTRF, TBCA, RRM1, CELF1, ATPIF1, SMARCA2, XRN2, CAV1, MTMR2, TFAM, EIF3A, CBR2, CSE1L, CENPA, ASF1A, TNPO1, HELLS, APC, TES, NASP, IPO11, TAF7, MIS12, CENPH, PSMG1, PSMG2, B…	0.000120598
GO:0065003~macromolecular complex assembly	MTSS1, SEPT2, HPRT, COX10, CAPZA2, LNX2, NAP1L1, MLH1, NAP1L4, GTF2E1, PICALM, H2AFV, GSN, H2AFZ, LSM2, TUBG1, USP16, TUBA1A, KPNB1, TBPL1, COX15, SRPK2, PCBD2, MBNL1, IPO8, MCM2, GTF2B, FLNA, SMN1, TAF11, SPAG9, TAF12, PTRF, TBCA, RRM1, CELF1, ATPIF1, SMARCA2, CAV1, MTMR2, TFAM, EIF3A, CBR2, CSE1L, CENPA, TNPO1, ASF1A, HELLS, APC, TES, IPO11, TAF7, MIS12, PSMG1, PSMG2, BAX, GTF2F1, GTF2F2	0.000162901
GO:0006886~intracellular protein transport	COPA, AP1G1, CASK, AIP, AP1S2, TIMM9, VPS16, TPR, KPNB1, SAR1A, SEC24D, RAN, SNUPN, IPO8, COPG2, ARCN1, SRP72, KPNA2, SEC23B, SRP9, ARL6IP1, STON2, SNX9, DERL2, AP1M1, MTX2, SNX1, GIPC1, POLA2, TOMM7, STX12, CSE1L, AP3M1, STX18, CHM, TNPO1, HSPA9, IPO11, STRADA, YWHAE, COG3, YWHAH, GSK3B, TSC2, PCNA, YWHAQ, NOP58, GOSR2, AP4B1, SSR3	0.000191563
GO:0044265~cellular macromolecule catabolic process	LSM6, LSM7, UFC1, BNIP3, MLH1, VPRBP, CDC16, RLIM, CUL3, FBXL19, DCPS, ZYG11B, CUL2, WWP2, WWP1, KLHL9, LSM5, NSMCE2, DDA1, RANBP2, ITCH, YOD1, LSM2, USP16, RNF34, USP14, DCAF15, AIFM1, DTL, USP1, MAGOH, SKP2, UBR1, PSMA2, PJA2, SENP2, PSMA1, DCUN1D1, UHRF1, PSMA5, UBE2K, PSMA4, PSMA3, FBXL5, RNF25, PIAS2, UBE2S, RNF20, XRN2, UBE2T, FBXO11, FZR1, DERL2, UBE3A, ANAPC13, ANAPC10, PSMA7, FEM1B, PSMB…	0.000265276
GO:0006730~one-carbon metabolic process	AHCY, EZH2, CTCF, N6AMT2, N6AMT1, MTHFD1, PRMT1, PRMT6, PCMT1, TGS1, DNMT3B, HELLS, ATF7IP, LCMT1, DNMT3A, METTL5, MAT2A, METTL4, CAR12, MECP2, SUZ12, DHFR, TRMT11, DNMT1, AHCYL1, AHCYL2, SETD2, MPHOSPH8	0.000276098
GO:0070271~protein complex biogenesis	MTSS1, CAV1, SEPT2, HPRT, COX10, CAPZA2, LNX2, MLH1, MTMR2, GTF2E1, TFAM, PICALM, CBR2, CSE1L, GSN, TUBG1, TUBA1A, USP16, TNPO1, KPNB1, TBPL1, APC, TES, COX15, PCBD2, IPO11, TAF7, IPO8, GTF2B, FLNA, MIS12, TAF11, SPAG9, PSMG1, TAF12, PSMG2, PTRF, TBCA, GTF2F1, BAX, RRM1, GTF2F2, ATPIF1	0.000317769
GO:0006461~protein complex assembly	MTSS1, CAV1, SEPT2, HPRT, COX10, CAPZA2, LNX2, MLH1, MTMR2, GTF2E1, TFAM, PICALM, CBR2, CSE1L, GSN, TUBG1, TUBA1A, USP16, TNPO1, KPNB1, TBPL1, APC, TES, COX15, PCBD2, IPO11, TAF7, IPO8, GTF2B, FLNA, MIS12, TAF11, SPAG9, PSMG1, TAF12, PSMG2, PTRF, TBCA, GTF2F1, BAX, RRM1, GTF2F2, ATPIF1	0.000317769
GO:0007059~chromosome segregation	PDS5B, DSN1, NUF2, MLH1, CENPE, BIRC5, CTCF, PTTG1, SRPK1, NCAPD3, MIS12, CENPH, SMC4, SPC25, ATF6B, NUP37, TOP2A, NEK6, BUB3	0.000634566
GO:0009057~macromolecule catabolic process	LSM6, LSM7, UFC1, BNIP3, MLH1, VPRBP, CDC16, RLIM, CUL3, FBXL19, DCPS, ZYG11B, CUL2, WWP2, WWP1, KLHL9, LSM5, NSMCE2, DDA1, RANBP2, ITCH, YOD1, LSM2, USP16, RNF34, USP14, DCAF15, AIFM1, DTL, USP1, MAGOH, SKP2, UBR1, PSMA2, PJA2, SENP2, PSMA1, DCUN1D1, UHRF1, PSMA5, UBE2K, PSMA4, PSMA3, FBXL5, RNF25, PIAS2, UBE2S, RNF20, XRN2, UBE2T, FBXO11, TRAF2, FZR1, DERL2, UBE3A, ANAPC13, ANAPC10, PSMA7, FEM1…	0.000760551
GO:0032259~methylation	ATF7IP, LCMT1, DNMT3A, METTL5, METTL4, EZH2, MECP2, CTCF, N6AMT2, N6AMT1, SUZ12, PRMT1, TRMT11, PRMT6, DNMT1, PCMT1, SETD2, TGS1, DNMT3B, MPHOSPH8, HELLS	0.00107957
GO:0007051~spindle organization	HAUS4, SPC25, HAUS3, HAUS2, HAUS1, MLH1, HAUS7, RANBP1, TUBG1, HAUS8, TACC3, SMC3	0.001091
GO:0009161~ribonucleoside monophosphate metabolic process	ADSS, GMPR2, ATIC, DHODH, PAICS, AMPD3, GMPS, PRPS2, PFAS, PRPS1	0.00107135
GO:0016568~chromatin modification	ENY2, BMI1, UTP3, MEAF6, MORF4L2, EZH2, HIRA, HAT1, BNIP3, CTCF, NR3C1, SMARCD2, PRMT6, TLK1, RNF168, ACTL6A, TLK2, USP16, TCF3, DNMT3B, ASF1A, HELLS, DNMT3A, RBBP4, NASP, RBL1, MECP2, SMYD3, RBBP7, GSG2, SUZ12, BAZ1A, BAZ1B, HDAC1, JMJD6, RNF2, SMARCAL1, DNMT1, RUVBL2, RUVBL1, SETD2, RNF20	0.00169001
GO:0043632~modification-dependent macromolecule catabolic process	UFC1, VPRBP, CDC16, RLIM, CUL3, FBXL19, ZYG11B, CUL2, WWP2, WWP1, KLHL9, NSMCE2, DDA1, RANBP2, ITCH, YOD1, USP16, RNF34, USP14, DCAF15, DTL, USP1, SKP2, UBR1, PSMA2, PJA2, SENP2, PSMA1, DCUN1D1, UHRF1, PSMA5, UBE2K, PSMA4, PSMA3, FBXL5, RNF25, PIAS2, UBE2S, RNF20, UBE2T, FBXO11, DERL2, FZR1, ANAPC13, UBE3A, ANAPC10, PSMA7, FEM1B, PSMB5, SUMO3, ARIH1, SUMO1, ARIH2, FBXW8, CACYBP, PPP2CB, RNF168, Z…	0.00175295
GO:0019941~modification-dependent protein catabolic process	UFC1, VPRBP, CDC16, RLIM, CUL3, FBXL19, ZYG11B, CUL2, WWP2, WWP1, KLHL9, NSMCE2, DDA1, RANBP2, ITCH, YOD1, USP16, RNF34, USP14, DCAF15, DTL, USP1, SKP2, UBR1, PSMA2, PJA2, SENP2, PSMA1, DCUN1D1, UHRF1, PSMA5, UBE2K, PSMA4, PSMA3, FBXL5, RNF25, PIAS2, UBE2S, RNF20, UBE2T, FBXO11, DERL2, FZR1, ANAPC13, UBE3A, ANAPC10, PSMA7, FEM1B, PSMB5, SUMO3, ARIH1, SUMO1, ARIH2, FBXW8, CACYBP, PPP2CB, RNF168, Z…	0.00175295
GO:0042981~regulation of apoptosis	BMI1, STIL, XRCC4, HTATIP2, JAG2, BNIP3, MLH1, ITSN1, CIAPIN1, CASP6, PGP, HTRA2, CASP8AP2, ATG5, CASP7, HMOX1, AEN, CASP8, TRP63, RHOA, DNAJC5, DDX20, DLG5, MKL1, NDUFS3, API5, CCAR1, IRAK2, NUDT2, RARG, CYCS, SKP2, MECP2, ADNP, POLB, STK3, SMO, UNC13D, HIF1A, VEGFA, MAPK9, MAPK8, THOC1, SIVA1, TNFRSF22, TRAF2, NR3C1, SRC, IKBIP, TSC22D3, 2610018G03RIK, BCL11B, PPP2CB, DAD1, DIABLO, FAIM, TRAF6,…	0.00177296
GO:0006325~chromatin organization	BMI1, ENY2, EZH2, MORF4L2, NAP1L1, HIRA, BNIP3, CTCF, CBX1, NAP1L4, SMARCD2, H2AFV, PRMT6, H2AFZ, TLK1, TLK2, USP16, RBBP4, RBL1, MECP2, MCM2, RBBP7, SUZ12, BAZ1A, BAZ1B, SMARCAL1, RUVBL2, RUVBL1, SMARCA2, RNF20, UTP3, MEAF6, HAT1, NR3C1, CENPA, ACTL6A, RNF168, TCF3, DNMT3B, ASF1A, HELLS, DNMT3A, NASP, SMYD3, GSG2, HDAC1, JMJD6, RNF2, DNMT1, SETD2, MPHOSPH8	0.0025758
GO:0043067~regulation of programmed cell death	BMI1, STIL, XRCC4, HTATIP2, JAG2, BNIP3, MLH1, ITSN1, CIAPIN1, CASP6, PGP, HTRA2, CASP8AP2, ATG5, CASP7, HMOX1, AEN, CASP8, TRP63, RHOA, DNAJC5, DDX20, DLG5, MKL1, NDUFS3, API5, CCAR1, IRAK2, NUDT2, RARG, CYCS, SKP2, MECP2, ADNP, POLB, STK3, SMO, UNC13D, HIF1A, VEGFA, MAPK9, MAPK8, THOC1, SIVA1, TNFRSF22, TRAF2, NR3C1, SRC, IKBIP, TSC22D3, 2610018G03RIK, BCL11B, PPP2CB, DAD1, DIABLO, FAIM, TRAF6,…	0.0026724
GO:0034404~nucleobase, nucleoside and nucleotide biosynthetic process	ADSS, HPRT, DTYMK, CTPS2, ATP5G3, PPAT, PFAS, MTHFD1, TYMS, ATIC, DHODH, PAPSS1, TBPL1, ATP5J, DCTD, ATP5J2, ATP11A, GMPS, AMPD3, NME7, APRT, ATP6V1C1, RP2H, NME4, ATP6V1A, DHFR, ADCY9, ADK, RRM1, ATP5C1, ADSL, PAICS, PRPS2, PRPS1	0.00275937
GO:0034654~nucleobase, nucleoside, nucleotide and nucleic acid biosynthetic process	ADSS, HPRT, DTYMK, CTPS2, ATP5G3, PPAT, PFAS, MTHFD1, TYMS, ATIC, DHODH, PAPSS1, TBPL1, ATP5J, DCTD, ATP5J2, ATP11A, GMPS, AMPD3, NME7, APRT, ATP6V1C1, RP2H, NME4, ATP6V1A, DHFR, ADCY9, ADK, RRM1, ATP5C1, ADSL, PAICS, PRPS2, PRPS1	0.00275937
GO:0009156~ribonucleoside monophosphate biosynthetic process	ADSS, ATIC, DHODH, PAICS, AMPD3, GMPS, PRPS2, PFAS, PRPS1	0.00294246
GO:0010941~regulation of cell death	BMI1, STIL, XRCC4, HTATIP2, JAG2, BNIP3, MLH1, ITSN1, CIAPIN1, CASP6, PGP, HTRA2, CASP8AP2, ATG5, CASP7, HMOX1, AEN, CASP8, TRP63, RHOA, DNAJC5, DDX20, DLG5, MKL1, NDUFS3, API5, CCAR1, IRAK2, NUDT2, RARG, CYCS, SKP2, MECP2, ADNP, POLB, STK3, SMO, UNC13D, HIF1A, VEGFA, MAPK9, MAPK8, THOC1, SIVA1, TNFRSF22, TRAF2, NR3C1, SRC, IKBIP, TSC22D3, 2610018G03RIK, BCL11B, PPP2CB, DAD1, DIABLO, FAIM, TRAF6,…	0.00289088
GO:0050658~RNA transport	ENY2, NUP133, NUP160, MAGOH, FMR1, G3BP2, NUP188, NUPL1, QK, NXT2, SENP2, PHAX, MAGOHB, NUP37, NUP107, RANBP2, NUP35, THOC1	0.00284406
GO:0050657~nucleic acid transport	ENY2, NUP133, NUP160, MAGOH, FMR1, G3BP2, NUP188, NUPL1, QK, NXT2, SENP2, PHAX, MAGOHB, NUP37, NUP107, RANBP2, NUP35, THOC1	0.00284406
GO:0051236~establishment of RNA localization	ENY2, NUP133, NUP160, MAGOH, FMR1, G3BP2, NUP188, NUPL1, QK, NXT2, SENP2, PHAX, MAGOHB, NUP37, NUP107, RANBP2, NUP35, THOC1	0.00284406
GO:0016192~vesicle-mediated transport	COPA, AP1G1, TXLNA, ITSN1, CTNNB1, HOOK1, TRAPPC6A, PICALM, AP1S2, GSN, ZFPL1, VPS4B, NECAP1, MCOLN1, SEC24D, SAR1A, SCAMP1, PLD2, KDELR2, PRKCI, ERGIC1, LDLRAP1, FLNA, ERGIC2, ELMO2, COPG2, UNC13D, STXBP6, SCYL1, STXBP5, 0610009B22RIK, LRP12, ARCN1, VAMP4, SEC23B, VPS29, STON2, ABCA7, AP1M1, CAV1, UBE3A, EXOC8, BET1, LMAN1, SRC, STX12, AP3M1, STX18, SNAP23, EHD1, EHD2, VPS36, RHOBTB3, VAV3, CORO…	0.00310193
GO:0030163~protein catabolic process	UFC1, VPRBP, CDC16, RLIM, CUL3, FBXL19, ZYG11B, CUL2, WWP2, WWP1, KLHL9, NSMCE2, DDA1, RANBP2, ITCH, YOD1, USP16, RNF34, USP14, DCAF15, DTL, USP1, SKP2, UBR1, PSMA2, PJA2, SENP2, PSMA1, DCUN1D1, UHRF1, PSMA5, UBE2K, PSMA4, PSMA3, FBXL5, RNF25, PIAS2, UBE2S, RNF20, UBE2T, FBXO11, TRAF2, DERL2, FZR1, ANAPC13, UBE3A, ANAPC10, PSMA7, FEM1B, PSMB5, SUMO3, ARIH1, SUMO1, ARIH2, FBXW8, CACYBP, PPP2CB, RN…	0.00312312
GO:0006403~RNA localization	ENY2, NUP133, NUP160, MAGOH, FMR1, G3BP2, NUP188, NUPL1, QK, NXT2, SENP2, PHAX, MAGOHB, NUP37, NUP107, RANBP2, NUP35, THOC1	0.00328504
GO:0002562~somatic diversification of immune receptors via germline recombination within a single locus	EXO1, MSH6, XRCC4, NBN, MSH2, UNG, BCL11B, XRCC6, MLH1, TCF3	0.00333585
GO:0016444~somatic cell DNA recombination	EXO1, MSH6, XRCC4, NBN, MSH2, UNG, BCL11B, XRCC6, MLH1, TCF3	0.00333585
GO:0015931~nucleobase, nucleoside, nucleotide and nucleic acid transport	ENY2, NUP133, NUP160, MAGOH, FMR1, G3BP2, NUP188, NUPL1, QK, NXT2, SENP2, PHAX, SLC29A3, MAGOHB, NUP37, NUP107, RANBP2, NUP35, THOC1	0.0035196
GO:0051603~proteolysis involved in cellular protein catabolic process	UFC1, VPRBP, CDC16, RLIM, CUL3, FBXL19, ZYG11B, CUL2, WWP2, WWP1, KLHL9, NSMCE2, DDA1, RANBP2, ITCH, YOD1, USP16, RNF34, USP14, DCAF15, DTL, USP1, SKP2, UBR1, PSMA2, PJA2, SENP2, PSMA1, DCUN1D1, UHRF1, PSMA5, UBE2K, PSMA4, PSMA3, FBXL5, RNF25, PIAS2, UBE2S, RNF20, UBE2T, FBXO11, DERL2, FZR1, ANAPC13, UBE3A, ANAPC10, PSMA7, FEM1B, PSMB5, SUMO3, ARIH1, SUMO1, ARIH2, FBXW8, CACYBP, PPP2CB, RNF168, Z…	0.00393677
GO:0051028~mRNA transport	ENY2, NUP133, NUP160, MAGOH, FMR1, G3BP2, NUP188, NUPL1, QK, NXT2, SENP2, MAGOHB, NUP37, NUP107, RANBP2, NUP35, THOC1	0.00400618
GO:0044257~cellular protein catabolic process	UFC1, VPRBP, CDC16, RLIM, CUL3, FBXL19, ZYG11B, CUL2, WWP2, WWP1, KLHL9, NSMCE2, DDA1, RANBP2, ITCH, YOD1, USP16, RNF34, USP14, DCAF15, DTL, USP1, SKP2, UBR1, PSMA2, PJA2, SENP2, PSMA1, DCUN1D1, UHRF1, PSMA5, UBE2K, PSMA4, PSMA3, FBXL5, RNF25, PIAS2, UBE2S, RNF20, UBE2T, FBXO11, DERL2, FZR1, ANAPC13, UBE3A, ANAPC10, PSMA7, FEM1B, PSMB5, SUMO3, ARIH1, SUMO1, ARIH2, FBXW8, CACYBP, PPP2CB, RNF168, Z…	0.00453543
GO:0006261~DNA-dependent DNA replication	PRIM1, CDC45, MCM7, POLD1, PRIM2, POLA1, TIPIN, MCM2, MCM4, DNAJA3, MCM6, RAD51	0.00576658
GO:0034621~cellular macromolecular complex subunit organization	MTSS1, ENAH, SEPT2, COX10, CAPZA2, NAP1L1, MLH1, NAP1L4, TFAM, EIF3A, PICALM, CSE1L, H2AFV, GSN, CENPA, H2AFZ, TUBG1, LSM2, TUBA1A, TNPO1, KPNB1, ASF1A, HELLS, TES, SRPK2, NASP, IPO11, IPO8, MCM2, MBNL1, FLNA, MIS12, SMN1, CENPH, PSMG1, PSMG2, PTRF, TBCA, CELF1, SMARCA2, XRN2	0.00597651
GO:0002200~somatic diversification of immune receptors	EXO1, MSH6, XRCC4, NBN, MSH2, UNG, BCL11B, XRCC6, MLH1, TCF3	0.00652277
GO:0009165~nucleotide biosynthetic process	ADSS, HPRT, DTYMK, CTPS2, ATP5G3, PFAS, MTHFD1, TYMS, ATIC, DHODH, PAPSS1, TBPL1, ATP5J, DCTD, ATP5J2, ATP11A, GMPS, AMPD3, NME7, ATP6V1C1, RP2H, NME4, ATP6V1A, DHFR, ADCY9, ADK, RRM1, ATP5C1, ADSL, PAICS, PRPS2, PRPS1	0.00667239
GO:0051726~regulation of cell cycle	FZR1, NBN, COPS5, DBF4, HUS1, TIPIN, BCCIP, ANAPC10, LATS2, CDT1, ATF6B, CDK5RAP3, RANBP1, TUBG1, ZWILCH, CDK5RAP1, TCF3, APC, CDK1, BCR, MSH2, ROCK2, GMNN, SKP2, BIRC5, CENPE, TACC3, CCND1, YWHAH, PSMG2, CCND3, JUN, BAX, UBA3, FBXO31, APBB2, NEK6	0.00664105
GO:0006913~nucleocytoplasmic transport	NUP133, HTATIP2, NUP160, RAN, SNUPN, IPO11, STRADA, POLA2, IPO8, PHAX, CSE1L, RSRC1, GSK3B, TSC2, LSG1, NOP58, TPR, TNPO1, KPNB1, KPNA2, HSPA9	0.0119032
GO:0032774~RNA biosynthetic process	POLR2G, TCOF1, MED21, POLR2D, POLR2B, PRIM1, TFAM, GTF2E1, PRIM2, TCEA1, TBPL1, CCNH, TAF7, GTF2H3, GTF2B, GTF2H2, TAF11, MNAT1, TAF12, PTRF, GTF2F1, THRAP3, GTF2F2, PIAS2, XRN2	0.012575
GO:0009116~nucleoside metabolic process	MAT2A, HPRT, NME7, PPAT, APRT, NME4, RP2H, ADK, DHODH, PCMT1, PRPS2, TBPL1, DCAKD, PRPS1, DUT	0.0136422
GO:0051169~nuclear transport	NUP133, HTATIP2, NUP160, RAN, SNUPN, IPO11, STRADA, POLA2, IPO8, PHAX, CSE1L, RSRC1, GSK3B, TSC2, LSG1, NOP58, TPR, TNPO1, KPNB1, KPNA2, HSPA9	0.0151014
GO:0043068~positive regulation of programmed cell death	SIVA1, HTATIP2, MLH1, BNIP3, NR3C1, SRC, IKBIP, CASP6, HTRA2, CASP8AP2, CASP7, HMOX1, AEN, TRP63, DIABLO, DDX20, TRAF6, NDUFS3, TEX261, APC, CCAR1, COL18A1, MSH6, NUDT2, RARG, TGFBR1, CYCS, SKP2, AMBRA1, BRCA1, STK3, TRADD, EI24, UNC13D, BAX, MAPK9, MAPK8, APAF1, APBB2, IGFBP3	0.016464
GO:0034622~cellular macromolecular complex assembly	MTSS1, SEPT2, COX10, CAPZA2, NAP1L1, MLH1, NAP1L4, TFAM, EIF3A, PICALM, CSE1L, H2AFV, GSN, CENPA, H2AFZ, TUBG1, LSM2, TUBA1A, TNPO1, KPNB1, ASF1A, HELLS, TES, SRPK2, IPO11, IPO8, MCM2, MBNL1, FLNA, MIS12, SMN1, PSMG1, PSMG2, TBCA, CELF1, SMARCA2	0.0169122
GO:0030261~chromosome condensation	NCAPH, AIFM1, NCAPG2, ATF6B, SMC2, TOP2A, NCAPD3, NCAPD2, SMC4	0.0171199
GO:0022613~ribonucleoprotein complex biogenesis	LSM6, UTP15, GNL3L, MINA, EXOSC10, DIMT1, DCAF13, MRPL10, EIF3A, DKC1, LSM2, SRPK2, EXOSC8, EXOSC9, RRP1, EXOSC7, EXOSC3, MBNL1, SMN1, DIS3, NOP14, NOP58, CELF1, POP4, ZNHIT6, C1D	0.0170518
GO:0032535~regulation of cellular component size	DERL2, LIMA1, NDN, TNFRSF12A, CAPZA2, CAPZA1, RDX, N6AMT1, ACTR3, ARHGAP5, ARPC3, ARPC2, GSN, TRP63, NDUFS3, DNAJC2, RASA1, LIMK1, CREB1, EI24, KRT17, ARPC5L, TSC2, CD81, TMOD3, CYFIP1, APBB2, XRN2, EMP1	0.0176563
GO:0010942~positive regulation of cell death	SIVA1, HTATIP2, MLH1, BNIP3, NR3C1, SRC, IKBIP, CASP6, HTRA2, CASP8AP2, CASP7, HMOX1, AEN, TRP63, DIABLO, DDX20, TRAF6, NDUFS3, TEX261, APC, CCAR1, COL18A1, MSH6, NUDT2, RARG, TGFBR1, CYCS, SKP2, AMBRA1, BRCA1, STK3, TRADD, EI24, UNC13D, BAX, MAPK9, MAPK8, APAF1, APBB2, IGFBP3	0.0179589
GO:0006091~generation of precursor metabolites and energy	TMX1, LDHA, NDUFB6, COX10, NDUFAB1, HK1, SDHAF2, ATP5G3, NDUFB2, CYB561D2, TPI1, CAT, NDUFS3, NFATC3, GAPDH, ATP5J, TXNL1, NDUFA2, NDUFA8, PFKL, MSH2, SUCLG2, CYCS, MECP2, PFKP, NDUFC1, CYB5B, NDUFA1, NDUFA12, IDH3A, ATP6V1C1, SLC25A12, ATP6V1A, PPP1R2, GBE1, SDHD, GYG, ATP5C1, PGK1, MDH2, MDH1	0.0184021
GO:0016447~somatic recombination of immunoglobulin gene segments	EXO1, MSH6, XRCC4, NBN, MSH2, UNG, MLH1, TCF3	0.0231236
GO:0006605~protein targeting	ARL6IP1, MTX2, GIPC1, POLA2, AIP, CSE1L, TIMM9, TPR, KPNB1, TNPO1, HSPA9, RAN, SNUPN, IPO11, STRADA, IPO8, YWHAE, GSK3B, TSC2, YWHAQ, NOP58, SRP72, KPNA2, SRP9, SSR3	0.024234
GO:0007010~cytoskeleton organization	HAUS4, MTSS1, HAUS3, ENAH, LIMA1, AGFG1, HAUS2, CAPZA2, BCAR1, CAPZA1, HAUS1, MLH1, TTL, PXN, HOOK1, SPC25, TUBGCP3, TUBGCP5, GSN, FAT1, RHOA, SHC1, RANBP1, TUBG1, EHD2, PLS3, TES, ROCK2, NUF2, PRKCI, ACTN1, CENPE, BIRC5, CSRP1, RACGAP1, TACC3, FLNA, BRCA1, VASP, SMC3, CORO1C, EPB4.1L2, EPB4.1L3, YWHAH, KRT17, LASP1, HAUS7, HAUS8	0.0241532
GO:0043065~positive regulation of apoptosis	SIVA1, MLH1, BNIP3, NR3C1, SRC, IKBIP, CASP6, HTRA2, CASP8AP2, CASP7, HMOX1, AEN, TRP63, DIABLO, DDX20, TRAF6, NDUFS3, TEX261, APC, CCAR1, COL18A1, MSH6, NUDT2, RARG, TGFBR1, CYCS, SKP2, AMBRA1, BRCA1, STK3, TRADD, EI24, UNC13D, BAX, MAPK9, MAPK8, APAF1, APBB2, IGFBP3	0.0239372
GO:0016569~covalent chromatin modification	BMI1, MEAF6, DNMT3A, EZH2, MECP2, HAT1, SUZ12, HDAC1, BAZ1B, RNF2, PRMT6, ACTL6A, RNF168, RUVBL2, RUVBL1, USP16, SETD2, DNMT3B, TCF3, HELLS	0.0262851
GO:0000226~microtubule cytoskeleton organization	HAUS4, HAUS3, HAUS2, CAPZA2, HAUS1, NUF2, MLH1, BIRC5, CENPE, TACC3, SMC3, BRCA1, TTL, HOOK1, SPC25, TUBGCP3, TUBGCP5, RANBP1, HAUS7, TUBG1, HAUS8, TES	0.0260097
GO:0006915~apoptosis	FASTKD2, HTATIP2, MRPL41, BNIP3, NFKB1, PAWR, CIAPIN1, CTNNB1, CLPTM1L, CASP6, HTRA2, CASP8AP2, CASP7, AEN, TIA1, CASP8, TRP63, RNF34, API5, CCAR1, IRAK2, SGPL1, AIFM1, CYCS, 4632434I11RIK, STK3, ELMO2, WDR92, SLTM, PDCL3, ZDHHC16, BNIP2, BUB1B, MFSD10, NEK6, PEG3, C1D, THOC1, SIVA1, TRAF2, FKBP8, GGCT, TNFRSF12A, FEM1B, 2610018G03RIK, DAD1, DIABLO, FAIM, TRAF6, DNAJA3, TFDP1, PDCD10, MSH2, SRA1,…	0.0280902
GO:0007093~mitotic cell cycle checkpoint	CDK1, CCND1, NBN, PSMG2, HUS1, FBXO31, CENPE, ZWILCH, APC	0.0282198
GO:0006270~DNA replication initiation	CDC45, MCM7, POLA1, MCM2, MCM4, MCM6	0.0344454
GO:0006351~transcription, DNA-dependent	POLR2G, CCNH, TCOF1, TAF7, GTF2H3, MED21, POLR2D, GTF2B, GTF2H2, POLR2B, TAF11, MNAT1, TFAM, GTF2E1, TAF12, PTRF, GTF2F1, GTF2F2, THRAP3, PIAS2, TCEA1, TBPL1, XRN2	0.0362956
GO:0033043~regulation of organelle organization	CAV1, LIMA1, CAPZA2, CAPZA1, ANAPC10, RDX, CTCF, ACTR3, ARPC3, GSN, ARPC2, RHOA, RANBP1, TLK1, TLK2, TUBG1, RASA1, TES, APC, ROCK2, MECP2, CENPE, YWHAH, PSMG2, ARPC5L, TMOD3, NEK6	0.0366418
GO:0006302~double-strand break repair	RPA1, XRCC4, NBN, MSH2, MRE11A, HUS1, XRCC6, POLA1, MLH1, RNF168, RAD51, TRIP13	0.0364273
GO:0016310~phosphorylation	HTATIP2, TBK1, CAPZA2, TTK, CASK, LPAR2, AURKB, LATS2, PRKX, PDPK1, STK39, PRKACA, SHC1, TLK1, PRKACB, TLK2, ATP5J, MAP2K5, IRAK2, EGFR, CDK1, SRPK2, BCR, STK25, LIMK1, PIK3C2A, ROCK2, PRKCI, MECP2, CDK6, DGUOK, PBK, SRPK1, CDK2, TBCK, STK3, ATP6V1C1, SPAG9, ATP6V1A, MAP4K5, CCND1, BAZ1B, SCYL1, MAPK6, RIOK3, EIF2S1, CD81, ATP5C1, MAPK9, BUB1B, MAPK8, NEK6, CAMK2G, HUS1, BMPR2, MKNK1, CHEK2, ATP5…	0.0365737
GO:0000377~RNA splicing, via transesterification reactions with bulged adenosine as nucleophile	SRPK2, RSRC1, TRA2B, LSM3, SNW1, CELF1, SNRNP70, LSM2, MBNL1, PRPF4, SMN1	0.0377004
GO:0042440~pigment metabolic process	ALAS1, HPRT, COX10, HMOX1, CPOX, DDT, HEBP1, IREB2, IDI1, PPAT, APRT	0.0377004
GO:0000375~RNA splicing, via transesterification reactions	SRPK2, RSRC1, TRA2B, LSM3, SNW1, CELF1, SNRNP70, LSM2, MBNL1, PRPF4, SMN1	0.0377004
GO:0000398~nuclear mRNA splicing, via spliceosome	SRPK2, RSRC1, TRA2B, LSM3, SNW1, CELF1, SNRNP70, LSM2, MBNL1, PRPF4, SMN1	0.0377004
GO:0006796~phosphate metabolic process	PDP2, TBK1, CAPZA2, CASK, TTK, PTPN21, LPAR2, AURKB, PRKX, STK39, TLK1, PRKACA, TLK2, PRKACB, MAP2K5, EGFR, BCR, STK25, PTPRF, ROCK2, MECP2, PTPRS, STK3, SPAG9, MAP4K5, BAZ1B, SCYL1, MAPK6, RIOK3, EIF2S1, ATP5C1, MAPK9, MAPK8, NEK6, PPP2R3A, HUS1, BMPR2, CHEK2, SDHAF2, PXN, SRC, VRK1, 2610018G03RIK, TNKS, PTPN9, RYK, TGFBR1, MET, EPHA1, PRKAR1A, DYRK1A, HTATIP2, IMPA1, LATS2, PDPK1, SHC1, ATP5J, …	0.0385532
GO:0006793~phosphorus metabolic process	PDP2, TBK1, CAPZA2, CASK, TTK, PTPN21, LPAR2, AURKB, PRKX, STK39, TLK1, PRKACA, TLK2, PRKACB, MAP2K5, EGFR, BCR, STK25, PTPRF, ROCK2, MECP2, PTPRS, STK3, SPAG9, MAP4K5, BAZ1B, SCYL1, MAPK6, RIOK3, EIF2S1, ATP5C1, MAPK9, MAPK8, NEK6, PPP2R3A, HUS1, BMPR2, CHEK2, SDHAF2, PXN, SRC, VRK1, 2610018G03RIK, TNKS, PTPN9, RYK, TGFBR1, MET, EPHA1, PRKAR1A, DYRK1A, HTATIP2, IMPA1, LATS2, PDPK1, SHC1, ATP5J, …	0.0385532
GO:0043066~negative regulation of apoptosis	BMI1, STIL, TRAF2, XRCC4, BNIP3, ITSN1, CIAPIN1, TSC22D3, ATG5, BCL11B, PPP2CB, TRP63, DAD1, RHOA, FAIM, DNAJC5, MKL1, API5, RASA1, HELLS, APC, MSH2, TGFBR1, MECP2, ADNP, SKP2, POLB, BIRC5, SNAI2, SMO, YWHAH, GSK3B, BAX, VEGFA, DPM1, MAPK8, APBB2	0.0384788
GO:0012501~programmed cell death	FASTKD2, HTATIP2, MRPL41, BNIP3, NFKB1, PAWR, CIAPIN1, CTNNB1, CLPTM1L, CASP6, HTRA2, CASP8AP2, CASP7, AEN, TIA1, CASP8, TRP63, RNF34, API5, CCAR1, IRAK2, SGPL1, AIFM1, CYCS, 4632434I11RIK, STK3, ELMO2, WDR92, SLTM, PDCL3, ZDHHC16, BNIP2, BUB1B, MFSD10, NEK6, PEG3, C1D, THOC1, SIVA1, TRAF2, FKBP8, GGCT, TNFRSF12A, FEM1B, 2610018G03RIK, DAD1, DIABLO, FAIM, TRAF6, DNAJA3, TFDP1, PDCD10, MSH2, SRA1,…	0.0380801
GO:0016445~somatic diversification of immunoglobulins	EXO1, MSH6, XRCC4, NBN, MSH2, UNG, MLH1, TCF3	0.0385041
GO:0006221~pyrimidine nucleotide biosynthetic process	NME4, RP2H, TYMS, DTYMK, DHODH, CTPS2, NME7, TBPL1	0.0385041
GO:0043623~cellular protein complex assembly	MTSS1, SEPT2, COX10, CAPZA2, IPO11, MLH1, IPO8, MIS12, FLNA, TFAM, PSMG1, PSMG2, PICALM, CSE1L, TBCA, GSN, TUBG1, TUBA1A, TNPO1, KPNB1, TES	0.0386571
GO:0051225~spindle assembly	HAUS4, HAUS3, HAUS2, HAUS1, MLH1, HAUS7, HAUS8	0.0383742
GO:0009167~purine ribonucleoside monophosphate metabolic process	ADSS, GMPR2, ATIC, PAICS, AMPD3, GMPS, PFAS	0.0383742
GO:0009126~purine nucleoside monophosphate metabolic process	ADSS, GMPR2, ATIC, PAICS, AMPD3, GMPS, PFAS	0.0383742
GO:0042770~DNA damage response, signal transduction	CDK1, MSH6, NBN, MSH2, HUS1, TIPIN, MLH1, CHEK2, BRCA1, CCND1, AEN, HMOX1, TRP63, FBXO31	0.0381265
GO:0043414~biopolymer methylation	ATF7IP, DNMT3A, LCMT1, EZH2, MECP2, CTCF, SUZ12, PRMT1, PRMT6, DNMT1, PCMT1, SETD2, TGS1, DNMT3B, MPHOSPH8, HELLS	0.0379858
GO:0044271~nitrogen compound biosynthetic process	ADSS, HPRT, COX10, DTYMK, ASNS, CTPS2, ATP5G3, PPAT, PFAS, MTHFD1, TYMS, ALAS1, ATIC, CPOX, DHODH, PAPSS1, TBPL1, ATP5J, DCTD, ATP5J2, PCBD2, MAT2A, IREB2, QDPR, ATP11A, AMPD3, GMPS, NME7, APRT, RP2H, ATP6V1C1, NME4, ATP6V1A, CTH, DHFR, ADCY9, ADK, RRM1, PHGDH, ATP5C1, ADSL, PAICS, PRPS2, PRPS1	0.0400654
GO:0006511~ubiquitin-dependent protein catabolic process	DERL2, UBE3A, PSMA7, CUL3, PSMB5, ARIH1, CUL2, ARIH2, FBXW8, PPP2CB, ITCH, USP16, USP14, USP32, USP1, SKP2, PCNP, UBR1, PSMA2, PSMA1, PSMA5, PSMA4, PSMA3, FBXO31, USP45	0.0429916
GO:0034984~cellular response to DNA damage stimulus	PAXIP1, TRP53BP1, RBBP5, MRE11A, FBXO31, RAD50	0.0483553
GO:0010564~regulation of cell cycle process	FZR1, ROCK2, DBF4, TIPIN, ANAPC10, CENPE, BIRC5, CDT1, YWHAH, PSMG2, ATF6B, RANBP1, TUBG1, APBB2, NEK6, APC	0.0486824
GO:0048193~Golgi vesicle transport	VPS29, PRKCI, BET1, LMAN1, ERGIC1, ERGIC2, COG3, COG5, SCYL1, 0610009B22RIK, SEC13, SEC24D, SEC23B	0.0487382
GO:0000075~cell cycle checkpoint	CDK1, NBN, MSH2, HUS1, TIPIN, CENPE, BIRC5, CDT1, CCND1, PSMG2, FBXO31, ZWILCH, APC	0.0487382
GO:0043069~negative regulation of programmed cell death	BMI1, STIL, TRAF2, XRCC4, BNIP3, ITSN1, CIAPIN1, TSC22D3, ATG5, BCL11B, PPP2CB, TRP63, DAD1, RHOA, FAIM, DNAJC5, MKL1, API5, RASA1, HELLS, APC, MSH2, TGFBR1, MECP2, ADNP, SKP2, POLB, BIRC5, SNAI2, SMO, YWHAH, GSK3B, BAX, VEGFA, DPM1, MAPK8, APBB2	0.0487251
GO:0009394~2'-deoxyribonucleotide metabolic process	TYMS, NUDT1, ADK, DTYMK, DGUOK, TBPL1, DUT	0.051325
GO:0007346~regulation of mitotic cell cycle	CDK1, NBN, DBF4, HUS1, ANAPC10, CENPE, BIRC5, CDT1, CCND1, YWHAH, PSMG2, ATF6B, FBXO31, RANBP1, TUBG1, APBB2, ZWILCH, NEK6, APC	0.050936
GO:0060548~negative regulation of cell death	BMI1, STIL, TRAF2, XRCC4, BNIP3, ITSN1, CIAPIN1, TSC22D3, ATG5, BCL11B, PPP2CB, TRP63, DAD1, RHOA, FAIM, DNAJC5, MKL1, API5, RASA1, HELLS, APC, MSH2, TGFBR1, MECP2, ADNP, SKP2, POLB, BIRC5, SNAI2, SMO, YWHAH, GSK3B, BAX, VEGFA, DPM1, MAPK8, APBB2	0.0507692
GO:0006350~transcription	MORF4L2, NAA15, HIRA, BBX, MPV17, TCEAL8, MED21, CNOT6, PNN, CTNNB1, ESF1, PRIM1, GTF2E1, SMARCD2, CASP8AP2, ATF6B, PRIM2, PSIP1, TRP63, ZFP503, SAP30L, TGS1, CRY1, ZFP275, TBPL1, CCAR1, RARG, TADA2A, ZFP326, RXRA, RBL1, GABPA, MTPAP, MECP2, MED14, MED13, GRHL2, ZFP592, SLTM, SUZ12, ZFP81, UHRF1, HIF1A, BAZ1A, PTRF, MED15, RFC1, BAZ1B, 0610009B22RIK, JUN, MED18, PIAS2, XRN2, ZFP512, EID1, MEAF6, …	0.0505135
GO:0006220~pyrimidine nucleotide metabolic process	NME4, RP2H, TYMS, DTYMK, DHODH, CTPS2, NME7, TBPL1, DUT	0.0501914
GO:0007017~microtubule-based process	KIF23, HAUS4, KIF22, HAUS3, CAPZA2, HAUS2, HAUS1, MLH1, TTL, HOOK1, SPC25, TUBGCP3, TUBGCP5, DYNLL1, DYNLL2, KIF4, RANBP1, TUBG1, TUBA1A, KIF2A, TES, KIF5B, NUF2, BIRC5, CENPE, TACC3, SMC3, BRCA1, HAUS7, HAUS8, XRN2, KIF20A, ACTR10	0.051702
GO:0033365~protein localization in organelle	RAN, SNUPN, MTX2, IPO11, PPP3R1, POLA2, IPO8, AIP, WDR92, CSE1L, TSC2, TIMM9, NOP58, SRP72, TPR, TNPO1, KPNB1, KPNA2, SRP9	0.0546367
GO:0034504~protein localization in nucleus	RAN, SNUPN, IPO11, PPP3R1, POLA2, IPO8, WDR92, CSE1L, TSC2, NOP58, TPR, KPNB1, KPNA2, TNPO1	0.0622224
GO:0001824~blastocyst development	GINS1, NBN, TGFBR1, NASP, MED21, CAPN2, CUL3, PRPF19, SP1, NCAPG2, SP3, DAD1, HBEGF	0.0618532
GO:0008219~cell death	FASTKD2, HTATIP2, MRPL41, HPRT, BNIP3, NFKB1, PAWR, CIAPIN1, CTNNB1, CLPTM1L, CASP6, HTRA2, CASP8AP2, CASP7, AEN, TIA1, CASP8, TRP63, RNF34, API5, CCAR1, IRAK2, SGPL1, AIFM1, CYCS, 4632434I11RIK, POLB, STK3, ELMO2, WDR92, SLTM, PDCL3, ZDHHC16, BNIP2, BUB1B, MFSD10, NEK6, PEG3, C1D, THOC1, SIVA1, TRAF2, FKBP8, GGCT, TNFRSF12A, FEM1B, 2610018G03RIK, DAD1, DIABLO, FAIM, TRAF6, DNAJA3, TFDP1, PDCD10,…	0.0644885
GO:0002204~somatic recombination of immunoglobulin genes during immune response	EXO1, MSH6, XRCC4, NBN, MSH2, MLH1	0.0663974
GO:0002208~somatic diversification of immunoglobulins during immune response	EXO1, MSH6, XRCC4, NBN, MSH2, MLH1	0.0663974
GO:0045190~isotype switching	EXO1, MSH6, XRCC4, NBN, MSH2, MLH1	0.0663974
GO:0045449~regulation of transcription	NAA15, HIRA, BBX, PDLIM1, MED21, CTNNB1, MAGED1, WWP1, WDR77, YEATS2, SAP30L, CRY1, CCNA2, TBPL1, CCAR1, RARG, TADA2A, NDNL2, ZFP326, RXRA, MECP2, MED14, MED13, ZFP81, UHRF1, BAZ1A, PTRF, MED15, RFC1, BAZ1B, JUN, MED18, SMARCAL1, VEGFA, PIAS2, FUS, TADA1, MYBL2, ZFP617, ZFP451, TRP53BP1, DMD, HTATSF1, LEO1, TCF3, DNMT3B, IKZF5, DNMT3A, SMAD5, SRA1, ZBTB41, ETS1, RNF2, RBPJ, CHAF1B, ENY2, ELF1, HT…	0.0667482
GO:0016265~death	FASTKD2, HTATIP2, MRPL41, HPRT, BNIP3, NFKB1, PAWR, CIAPIN1, CTNNB1, CLPTM1L, CASP6, HTRA2, CASP8AP2, CASP7, AEN, TIA1, CASP8, TRP63, RNF34, API5, CCAR1, IRAK2, SGPL1, AIFM1, CYCS, ZFX, 4632434I11RIK, POLB, STK3, ELMO2, WDR92, SLTM, PDCL3, ZDHHC16, BNIP2, BUB1B, MFSD10, NEK6, PEG3, C1D, THOC1, SIVA1, TRAF2, FKBP8, GGCT, TNFRSF12A, FEM1B, 2610018G03RIK, DAD1, DIABLO, FAIM, TRAF6, DNAJA3, TFDP1, PD…	0.0703881
GO:0009411~response to UV	MSH6, ERCC5, MSH2, USP1, CASP7, BAX, HUS1, TIPIN, MAPK8, ERCC4	0.0711692
GO:0009262~deoxyribonucleotide metabolic process	TYMS, NUDT1, ADK, DTYMK, RRM1, DGUOK, TBPL1, DUT	0.0735732
GO:0006888~ER to Golgi vesicle-mediated transport	COG3, 0610009B22RIK, BET1, SEC13, LMAN1, SEC24D, ERGIC1, ERGIC2, SEC23B	0.0738619
GO:0051329~interphase of mitotic cell cycle	CCND1, PPM1D, PPP2R3A, CAMK2G, DBF4, POLA1, SKP2, BIRC5, DNAJC2, TCF3, LATS2, TFDP1	0.0787371
GO:0009263~deoxyribonucleotide biosynthetic process	TYMS, ADK, DTYMK, RRM1, TBPL1	0.0787109
GO:0006468~protein amino acid phosphorylation	HTATIP2, TBK1, CAPZA2, CASK, TTK, LPAR2, AURKB, LATS2, PRKX, PDPK1, STK39, PRKACA, SHC1, TLK1, PRKACB, TLK2, MAP2K5, IRAK2, EGFR, CDK1, SRPK2, BCR, STK25, LIMK1, ROCK2, PRKCI, CDK6, DGUOK, PBK, SRPK1, TBCK, STK3, CDK2, SPAG9, MAP4K5, CCND1, BAZ1B, MAPK6, SCYL1, RIOK3, EIF2S1, CD81, MAPK9, BUB1B, MAPK8, NEK6, CAMK2G, HUS1, BMPR2, MKNK1, CHEK2, PXN, SRC, VRK1, 2610018G03RIK, BUB1, TNKS, YES1, PIK3R…	0.0825767
GO:0051297~centrosome organization	HAUS4, HAUS3, HAUS2, HAUS1, HAUS7, HAUS8, BRCA1	0.0841351
GO:0032446~protein modification by small protein conjugation	BMI1, UBE3A, SKP2, PCNP, TRIM23, SUMO3, SUZ12, PRPF19, SUMO1, WWP1, RNF2, UBA3, NSMCE2, PIAS2, RNF168, ITCH	0.0865041
GO:0032271~regulation of protein polymerization	CAV1, CAPZA2, CAPZA1, RDX, ACTR3, ARPC3, GSN, ARPC2, ARPC5L, TMOD3, RASA1, TES, APC	0.0876736
GO:0046148~pigment biosynthetic process	ALAS1, HPRT, COX10, CPOX, DDT, IREB2, IDI1, PPAT, APRT	0.0870499
GO:0009127~purine nucleoside monophosphate biosynthetic process	ADSS, ATIC, PAICS, AMPD3, GMPS, PFAS	0.0884216
GO:0030865~cortical cytoskeleton organization	EPB4.1L2, CORO1C, EPB4.1L3, LASP1, ACTN1, EHD2	0.0884216
GO:0009168~purine ribonucleoside monophosphate biosynthetic process	ADSS, ATIC, PAICS, AMPD3, GMPS, PFAS	0.0884216
GO:0006457~protein folding	FKBP8, FKBP5, PPIL1, CCT6A, CDC26, HSCB, AIP, PFDN1, DNAJC16, DNAJB11, DNAJC14, PFDN4, PPIC, SEP15, PPIL4, HSPE1, DNAJC5, RANBP2, FKBP11, QSOX1, DNAJA3, HSPA9	0.0883693
GO:0009260~ribonucleotide biosynthetic process	ADSS, ATP5J2, ATP11A, GMPS, ATP5G3, AMPD3, PFAS, NME7, RP2H, ATP6V1C1, NME4, ATP6V1A, ATIC, ATP5C1, DHODH, ADSL, PAICS, PRPS2, ATP5J, PRPS1	0.0896389
GO:0043254~regulation of protein complex assembly	ATF7IP, CAV1, CAPZA2, CAPZA1, RDX, ACTR3, ARPC3, GSN, ARPC2, ARPC5L, TMOD3, RASA1, APC, TES	0.093282
GO:0051170~nuclear import	HTATIP2, RAN, SNUPN, IPO11, IPO8, POLA2, CSE1L, TSC2, NOP58, TPR, KPNB1, KPNA2, TNPO1	0.096535
GO:0042254~ribosome biogenesis	EXOSC8, EXOSC9, RRP1, EXOSC7, LSM6, UTP15, EXOSC3, GNL3L, EXOSC10, DIMT1, DIS3, NOP14, MINA, DCAF13, MRPL10, DKC1, NOP58, POP4, ZNHIT6, C1D	0.096526
GO:0070647~protein modification by small protein conjugation or removal	BMI1, UBE3A, USP1, SKP2, PCNP, TRIM23, SUMO3, SENP2, SUZ12, PRPF19, SUMO1, RNF2, WWP1, UBA3, NSMCE2, PIAS2, RNF168, ITCH, USP16	0.0961437
GO:0051325~interphase	CCND1, PPM1D, PPP2R3A, CAMK2G, DBF4, POLA1, SKP2, BIRC5, DNAJC2, TCF3, LATS2, TFDP1	0.0965603
GO:0046777~protein amino acid autophosphorylation	IRAK2, EGFR, HTATIP2, CAMK2G, TGFBR1, CAPZA2, MET, TRIM28, VRK1, EIF2S1, DYRK1A, PRKACA, YES1, TES	0.102361
GO:0006541~glutamine metabolic process	GFPT1, MECP2, PHGDH, ASNS, CTPS2, GMPS, PFAS	0.10165
GO:0044087~regulation of cellular component biogenesis	ATF7IP, CAV1, TGFBR1, CAPZA2, CAPZA1, MECP2, RDX, ACTR3, ARPC3, ARPC2, GSN, ARPC5L, RHOA, TMOD3, RASA1, APC, TES	0.101687
GO:0006366~transcription from RNA polymerase II promoter	POLR2G, CCNH, TAF7, GTF2H3, MED21, POLR2D, GTF2H2, POLR2B, TAF11, GTF2E1, MNAT1, GTF2F1, GTF2F2, THRAP3, TBPL1	0.106173
GO:0006364~rRNA processing	EXOSC8, EXOSC9, RRP1, EXOSC7, LSM6, UTP15, EXOSC3, EXOSC10, DIMT1, DIS3, NOP14, DCAF13, DKC1, POP4, C1D	0.106173
GO:0009124~nucleoside monophosphate biosynthetic process	ADSS, TYMS, ADCY9, ATIC, DHODH, PAICS, AMPD3, GMPS, PRPS2, PFAS, PRPS1	0.108954
GO:0002566~somatic diversification of immune receptors via somatic mutation	EXO1, MSH6, MSH2, UNG, MLH1	0.111362
GO:0016446~somatic hypermutation of immunoglobulin genes	EXO1, MSH6, MSH2, UNG, MLH1	0.111362
GO:0010605~negative regulation of macromolecule metabolic process	BMI1, MLH1, BNIP3, NFKB1, CTCF, CBX1, CTNNB1, CDT1, EIF4EBP1, ATG5, WWP1, TIA1, ATF6B, PRMT6, TRP63, DDX20, KHDRBS1, ATF7IP, CTBP2, RARG, GABPA, RBL1, MECP2, SKP2, RBBP7, FLNA, GZF1, CTNNBIP1, SUZ12, JUN, CR1L, SRP9, C1D, UTP3, EID1, CAV1, HUS1, TIPIN, HAT1, GIPC1, ZKSCAN17, POU2F1, TNRC6A, DNMT3B, HELLS, DNMT3A, MSH6, MSH2, GMNN, TRIM28, TRIM27, SNW1, YWHAE, HDAC1, YAF2, BAX, RNF2, DNMT1, ZFP281…	0.1129
GO:0016072~rRNA metabolic process	EXOSC8, EXOSC9, RRP1, EXOSC7, LSM6, UTP15, EXOSC3, EXOSC10, DIMT1, DIS3, NOP14, DCAF13, DKC1, POP4, C1D	0.116049
GO:0051493~regulation of cytoskeleton organization	LIMA1, CAV1, ROCK2, CAPZA2, CAPZA1, RDX, CENPE, ACTR3, ARPC3, ARPC2, GSN, ARPC5L, RHOA, TMOD3, RANBP1, RASA1, APC, TES	0.120509
GO:0009265~2'-deoxyribonucleotide biosynthetic process	TYMS, ADK, DTYMK, TBPL1	0.121093
GO:0009119~ribonucleoside metabolic process	NME4, RP2H, MAT2A, HPRT, ADK, DHODH, PCMT1, NME7, APRT, DCAKD	0.120809
GO:0051053~negative regulation of DNA metabolic process	MSH6, MSH2, GMNN, HUS1, TIPIN, MLH1, CDT1	0.123533
GO:0016570~histone modification	BMI1, MEAF6, EZH2, MECP2, HAT1, SUZ12, HDAC1, BAZ1B, RNF2, PRMT6, ACTL6A, RNF168, RUVBL2, RUVBL1, USP16, SETD2, TCF3	0.129527
GO:0010557~positive regulation of macromolecule biosynthetic process	ENY2, ELF1, HTATIP2, TBK1, CASK, NFKB1, PAWR, MED21, CBFB, CTNNB1, FUBP3, TRP63, USP16, MKL1, CCNA2, TOP2A, PSMD9, ATF7IP, RARG, RXRA, ZFP326, MECP2, MED14, MED13, CDK2, SMO, HIF1A, KRT17, ZMIZ1, JUN, VEGFA, PTMS, CLOCK, SERP1, FUS, CNBP, UBE3A, NFIX, ARNT, HOXA1, BCL11B, POU2F1, TCEA1, TRAF6, NFATC3, TCF3, ING1, TFDP1, CREB1, SMAD5, SRA1, TRIM28, SNW1, AFF1, ZFP148, SREBF2, YWHAH, SP1, ETS1, YAF…	0.130043
GO:0009259~ribonucleotide metabolic process	ADSS, ATP5J2, GMPR2, ATP11A, GMPS, ATP5G3, AMPD3, PFAS, NME7, RP2H, ATP6V1C1, NME4, ATP6V1A, ATIC, ATP5C1, DHODH, ADSL, PAICS, PRPS2, ATP5J, PRPS1	0.131512
GO:0006323~DNA packaging	AIFM1, NAP1L1, MCM2, NAP1L4, SMC2, NCAPD3, NCAPD2, SMC4, NCAPH, H2AFV, NCAPG2, CENPA, ATF6B, H2AFZ, ASF1A, TOP2A, SMARCA2, HELLS	0.139152
GO:0006163~purine nucleotide metabolic process	ADSS, GMPR2, HPRT, ATP5G3, PFAS, MTHFD1, ATIC, PAPSS1, ATP5J, ATP5J2, NUDT1, ATP11A, DGUOK, GMPS, AMPD3, NME7, NME4, RP2H, ATP6V1C1, ATP6V1A, ADCY9, ADK, ATP5C1, ADSL, PAICS	0.140176
GO:0045941~positive regulation of transcription	ENY2, ELF1, HTATIP2, CASK, NFKB1, MED21, CBFB, CTNNB1, FUBP3, TRP63, USP16, MKL1, CCNA2, TOP2A, PSMD9, ATF7IP, RARG, RXRA, ZFP326, MECP2, MED14, MED13, CDK2, SMO, HIF1A, ZMIZ1, JUN, VEGFA, CLOCK, FUS, CNBP, UBE3A, NFIX, ARNT, HOXA1, BCL11B, POU2F1, TCEA1, NFATC3, TCF3, ING1, TFDP1, CREB1, SMAD5, SRA1, TRIM28, SNW1, AFF1, ZFP148, SREBF2, YWHAH, SP1, ETS1, YAF2, GTF2F1, GTF2F2, THRAP3, NFIC, NFIB	0.141256
GO:0002381~immunoglobulin production during immune response	EXO1, MSH6, XRCC4, NBN, MSH2, MLH1	0.142364
GO:0000910~cytokinesis	SEPT2, PRC1, ROCK2, BIRC5, ANLN, AURKB, RACGAP1, APC	0.142608
GO:0031023~microtubule organizing center organization	HAUS4, HAUS3, HAUS2, HAUS1, HAUS7, HAUS8, BRCA1	0.148596
GO:0042475~odontogenesis of dentine-containing tooth	SMO, PGP, NF2, BAX, FST, TRP63, JAG2, TRAF6, NFIC, CTNNB1	0.154958
GO:0010628~positive regulation of gene expression	ENY2, ELF1, HTATIP2, CASK, NFKB1, CTCF, MED21, CBFB, CTNNB1, FUBP3, TRP63, USP16, MKL1, CCNA2, TOP2A, PSMD9, ATF7IP, RARG, RXRA, ZFP326, MECP2, MED14, MED13, CDK2, SMO, HIF1A, ZMIZ1, JUN, VEGFA, CLOCK, FUS, CNBP, UBE3A, NFIX, ARNT, HOXA1, BCL11B, POU2F1, TCEA1, NFATC3, TCF3, ING1, TFDP1, CREB1, SMAD5, SRA1, TRIM28, SNW1, AFF1, ZFP148, SREBF2, YWHAH, SP1, ETS1, YAF2, GTF2F1, GTF2F2, THRAP3, NFIC, …	0.157555
GO:0006606~protein import into nucleus	CSE1L, RAN, SNUPN, IPO11, TSC2, NOP58, POLA2, IPO8, TPR, KPNA2, KPNB1, TNPO1	0.163527
GO:0001568~blood vessel development	GNA13, CAV1, HTATIP2, TNFRSF12A, NAA15, ELK3, CTNNB1, SEMA5A, FBXW8, ATG5, DHCR7, HMOX1, CASP8, CHM, SEMA3C, SHC1, RAPGEF1, RASA1, NSDHL, COL18A1, SGPL1, TGFBR1, SMAD5, QK, ANXA2, SMO, HIF1A, NUS1, JMJD6, BAX, ZMIZ1, VEGFA, HBEGF, RBPJ	0.169074
GO:0006402~mRNA catabolic process	EXOSC10, DCPS, DCP2, LSM6, MAGOH, EIF3E, LSM7, LSM5, MLH1, LSM2	0.175415
GO:0008629~induction of apoptosis by intracellular signals	MSH6, HTRA2, AEN, HMOX1, BAX, TRP63, MLH1, DIABLO, BRCA1	0.174486
GO:0006916~anti-apoptosis	TRAF2, SKP2, BNIP3, POLB, BIRC5, SNAI2, CIAPIN1, TSC22D3, GSK3B, VEGFA, TRP63, DAD1, FAIM, MKL1, HELLS, API5	0.17428
GO:0030307~positive regulation of cell growth	DERL2, KRT17, TNFRSF12A, LIMK1, CD81, N6AMT1	0.176719
GO:0031328~positive regulation of cellular biosynthetic process	ENY2, ELF1, HTATIP2, TBK1, CASK, NFKB1, PAWR, MED21, CBFB, CTNNB1, FUBP3, TRP63, USP16, MKL1, CCNA2, TOP2A, PSMD9, ATF7IP, RARG, RXRA, ZFP326, MECP2, MED14, MED13, CDK2, SMO, HIF1A, KRT17, ZMIZ1, JUN, VEGFA, PTMS, CLOCK, SERP1, FUS, CNBP, ADORA2B, UBE3A, NFIX, ARNT, HOXA1, BCL11B, POU2F1, TCEA1, TRAF6, NFATC3, ING1, TCF3, TFDP1, CREB1, SMAD5, SRA1, TRIM28, SNW1, AFF1, ZFP148, SREBF2, YWHAH, SP1, …	0.185217
GO:0043524~negative regulation of neuron apoptosis	XRCC4, MSH2, BAX, MECP2, ADNP, RHOA, DPM1, BIRC5, DNAJC5, ITSN1, RASA1	0.188119
GO:0008064~regulation of actin polymerization or depolymerization	ACTR3, LIMA1, ARPC3, ARPC2, GSN, ARPC5L, CAPZA2, CAPZA1, TMOD3, RDX, RASA1	0.188119
GO:0006465~signal peptide processing	SEC11C, SEC11A, SPCS3, SPCS2	0.188417
GO:0006473~protein amino acid acetylation	BMI1, MEAF6, NAA50, MECP2, HAT1, ACTL6A, RUVBL2, RUVBL1, TCF3	0.197166
GO:0006268~DNA unwinding during replication	MCM7, MCM2, MCM4, MCM6, RAD51	0.199479
GO:0006917~induction of apoptosis	BNIP3, MLH1, IKBIP, CASP6, CASP8AP2, HTRA2, HMOX1, AEN, CASP7, TRP63, DIABLO, DDX20, TRAF6, NDUFS3, MSH6, NUDT2, TGFBR1, BRCA1, TRADD, EI24, UNC13D, BAX, MAPK9, MAPK8, APAF1	0.20159
GO:0012502~induction of programmed cell death	BNIP3, MLH1, IKBIP, CASP6, CASP8AP2, HTRA2, HMOX1, AEN, CASP7, TRP63, DIABLO, DDX20, TRAF6, NDUFS3, MSH6, NUDT2, TGFBR1, BRCA1, TRADD, EI24, UNC13D, BAX, MAPK9, MAPK8, APAF1	0.20159
GO:0002520~immune system development	XRCC4, NBN, GMPR2, UNG, XRCC6, JAG2, MLH1, NFKB1, TTC7, CIAPIN1, CBFB, CTNNB1, RPA1, PICALM, BCL11B, WWP1, CASP8, TCEA1, TRAF6, TCF3, HELLS, DNAJA3, APC, EXO1, SGPL1, MSH6, MSH2, TGFBR1, SMAD5, CDK6, TACC3, CCNB2, HIF1A, SP1, JMJD6, BAX, SP3, VEGFA, RBPJ	0.200634
GO:0001701~in utero embryonic development	GNA13, BMI1, STIL, XRCC4, NBN, COPS3, PITPNB, MED21, ARNT, PRPF19, RPA1, CUL3, PRMT1, FBXW8, LY6E, NCAPG2, DAD1, NSDHL, GINS1, EGFR, MSH2, NASP, TGFBR1, GABPA, MBNL1, CAPN2, WNT7B, TULP3, CCNB2, HIF1A, SP1, SP3, ZMIZ1, HBEGF, DNAJB6, CR1L	0.199785
GO:0017038~protein import	RAN, SNUPN, MTX2, IPO11, POLA2, IPO8, AIP, CSE1L, TSC2, TIMM9, NOP58, TPR, KPNB1, KPNA2, TNPO1	0.20008
GO:0030832~regulation of actin filament length	ACTR3, LIMA1, ARPC3, ARPC2, GSN, ARPC5L, CAPZA2, CAPZA1, TMOD3, RDX, RASA1	0.203872
GO:0018130~heterocycle biosynthetic process	MTHFD1, ALAS1, PCBD2, HPRT, COX10, ADK, CPOX, IREB2, QDPR, LIAS, APRT	0.203872
GO:0006306~DNA methylation	ATF7IP, DNMT3A, DNMT1, CTCF, DNMT3B, MPHOSPH8, HELLS	0.204302
GO:0006305~DNA alkylation	ATF7IP, DNMT3A, DNMT1, CTCF, DNMT3B, MPHOSPH8, HELLS	0.204302
GO:0009891~positive regulation of biosynthetic process	ENY2, ELF1, HTATIP2, TBK1, CASK, NFKB1, PAWR, MED21, CBFB, CTNNB1, FUBP3, TRP63, USP16, MKL1, CCNA2, TOP2A, PSMD9, ATF7IP, RARG, RXRA, ZFP326, MECP2, MED14, MED13, CDK2, SMO, HIF1A, KRT17, ZMIZ1, JUN, VEGFA, PTMS, CLOCK, SERP1, FUS, CNBP, ADORA2B, UBE3A, NFIX, ARNT, HOXA1, BCL11B, POU2F1, TCEA1, TRAF6, NFATC3, ING1, TCF3, TFDP1, CREB1, SMAD5, SRA1, TRIM28, SNW1, AFF1, ZFP148, SREBF2, YWHAH, SP1, …	0.20872
GO:0001944~vasculature development	GNA13, CAV1, HTATIP2, TNFRSF12A, NAA15, ELK3, CTNNB1, SEMA5A, FBXW8, ATG5, DHCR7, HMOX1, CASP8, CHM, SEMA3C, SHC1, RAPGEF1, RASA1, NSDHL, COL18A1, SGPL1, TGFBR1, SMAD5, QK, ANXA2, SMO, HIF1A, NUS1, JMJD6, BAX, ZMIZ1, VEGFA, HBEGF, RBPJ	0.209877
GO:0009123~nucleoside monophosphate metabolic process	ADSS, TYMS, GMPR2, ADCY9, ATIC, DHODH, PAICS, AMPD3, GMPS, PRPS2, PFAS, PRPS1	0.209093
GO:0002377~immunoglobulin production	EXO1, MSH6, XRCC4, NBN, MSH2, UNG, MLH1, TCF3	0.214408
GO:0008361~regulation of cell size	DERL2, NDN, TNFRSF12A, LIMK1, CREB1, N6AMT1, EI24, ARHGAP5, KRT17, CD81, TSC2, TRP63, CYFIP1, NDUFS3, APBB2, DNAJC2, EMP1, XRN2	0.213781
GO:0006352~transcription initiation	TAF11, GTF2E1, TAF12, PTRF, GTF2F1, GTF2F2, TAF7, GTF2B, TBPL1	0.213367
GO:0045935~positive regulation of nucleobase, nucleoside, nucleotide and nucleic acid metabolic process	ENY2, ELF1, HTATIP2, CASK, NFKB1, MED21, CBFB, CTNNB1, FUBP3, TRP63, USP16, MKL1, CCNA2, TOP2A, PSMD9, ATF7IP, RARG, RXRA, ZFP326, MECP2, MED14, MED13, CDK2, SMO, HIF1A, ZMIZ1, JUN, VEGFA, CLOCK, FUS, CNBP, ADORA2B, UBE3A, NFIX, ARNT, HOXA1, BCL11B, POU2F1, RNF168, TCEA1, NFATC3, TCF3, ING1, TFDP1, CREB1, SMAD5, SRA1, TRIM28, SNW1, AFF1, ZFP148, SREBF2, YWHAH, SP1, ETS1, YAF2, GTF2F1, GTF2F2, THR…	0.214204
GO:0032956~regulation of actin cytoskeleton organization	ACTR3, LIMA1, ARPC3, ARPC2, GSN, ARPC5L, CAPZA2, CAPZA1, RHOA, TMOD3, RDX, RASA1	0.227133
GO:0030833~regulation of actin filament polymerization	ACTR3, ARPC3, ARPC2, GSN, ARPC5L, CAPZA2, CAPZA1, TMOD3, RDX, RASA1	0.231712
GO:0042476~odontogenesis	SMO, PGP, NF2, BAX, FST, TRP63, JAG2, TRAF6, NFIC, CTNNB1	0.231712
GO:0006304~DNA modification	ATF7IP, DNMT3A, DNMT1, CTCF, DNMT3B, MPHOSPH8, HELLS	0.234335
GO:0048514~blood vessel morphogenesis	GNA13, CAV1, HTATIP2, TNFRSF12A, NAA15, ELK3, CTNNB1, SEMA5A, ATG5, HMOX1, CASP8, SEMA3C, SHC1, RASA1, COL18A1, SGPL1, TGFBR1, SMAD5, QK, ANXA2, SMO, HIF1A, NUS1, BAX, ZMIZ1, VEGFA, HBEGF, RBPJ	0.235085
GO:0032508~DNA duplex unwinding	MCM7, MCM2, MCM4, MCM6, RAD51	0.244555
GO:0006298~mismatch repair	EXO1, ANKRD17, MSH6, MSH2, MLH1	0.244555
GO:0033261~regulation of S phase	DBF4, ATF6B, TIPIN, APBB2, CDT1	0.244555
GO:0032970~regulation of actin filament-based process	ACTR3, LIMA1, ARPC3, ARPC2, GSN, ARPC5L, CAPZA2, CAPZA1, RHOA, TMOD3, RDX, RASA1	0.245898
GO:0006275~regulation of DNA replication	GMNN, WRNIP1, HUS1, PCNA, TIPIN, CDT1	0.247882
GO:0006367~transcription initiation from RNA polymerase II promoter	TAF11, GTF2E1, GTF2F1, GTF2F2, TAF7, TBPL1	0.247882
GO:0051173~positive regulation of nitrogen compound metabolic process	ENY2, ELF1, HTATIP2, HPRT, CASK, NFKB1, MED21, CBFB, CTNNB1, FUBP3, TRP63, USP16, MKL1, CCNA2, TOP2A, PSMD9, ATF7IP, RARG, RXRA, ZFP326, MECP2, MED14, MED13, CDK2, SMO, HIF1A, ZMIZ1, JUN, VEGFA, CLOCK, FUS, CNBP, ADORA2B, UBE3A, NFIX, ARNT, HOXA1, BCL11B, POU2F1, RNF168, TCEA1, NFATC3, TCF3, ING1, TFDP1, CREB1, SMAD5, SRA1, TRIM28, SNW1, AFF1, ZFP148, SREBF2, YWHAH, SP1, ETS1, YAF2, GTF2F1, GTF2F…	0.251502
GO:0006164~purine nucleotide biosynthetic process	ADSS, ATP5J2, HPRT, ATP11A, GMPS, ATP5G3, AMPD3, PFAS, NME7, RP2H, ATP6V1C1, MTHFD1, NME4, ATP6V1A, ADCY9, ATIC, ADK, ATP5C1, ADSL, PAICS, ATP5J	0.25287
GO:0051248~negative regulation of protein metabolic process	CAV1, MECP2, GIPC1, YWHAE, FLNA, EIF4EBP1, ATG5, BAX, TIA1, JUN, TNRC6A, IGFBP3, SRP9, CR1L	0.263452
GO:0040029~regulation of gene expression, epigenetic	ATF7IP, DNMT3A, SMCHD1, MECP2, TRIM27, HAT1, CTCF, BRCA1, DNMT1, TNRC6A, DNMT3B, HELLS, MPHOSPH8	0.265338
GO:0045454~cell redox homeostasis	TMX2, GLRX3, TXNL1, TMX1, DNAJC16, NXN, TXNDC17, AIFM1, PRDX4, PDIA6, 2700094K13RIK, QSOX1	0.264135
GO:0022900~electron transport chain	TXNL1, TMX1, NDUFA2, NDUFB6, NDUFA8, CYCS, MECP2, NDUFAB1, NDUFC1, CYB5B, NDUFA1, SDHAF2, NDUFA12, NDUFB2, SLC25A12, CYB561D2, SDHD, NDUFS3	0.266945
GO:0002440~production of molecular mediator of immune response	EXO1, MSH6, XRCC4, NBN, MSH2, UNG, MLH1, TCF3	0.26808
GO:0051172~negative regulation of nitrogen compound metabolic process	BMI1, MLH1, NFKB1, CBX1, CDT1, CTNNB1, DYNLL1, WWP1, ATF6B, PRMT6, TRP63, DDX20, ATF7IP, KHDRBS1, CTBP2, RARG, RBL1, GABPA, MECP2, RBBP7, GZF1, CTNNBIP1, SUZ12, ATPIF1, C1D, EID1, CAV1, HUS1, TIPIN, HAT1, ZKSCAN17, POU2F1, DNMT3B, HELLS, DNMT3A, MSH6, MSH2, GMNN, TRIM28, TRIM27, SNW1, HDAC1, YAF2, RNF2, DNMT1, ZFP281, RBPJ, NFIC, DNAJB6	0.267139
GO:0010608~posttranscriptional regulation of gene expression	PAIP1, MAGOH, IREB2, MKNK1, GIPC1, IGF2BP2, FLNA, QK, MTRR, SMO, TRNAU1AP, EIF4EBP1, EIF4E, KRT17, EIF2S1, TIA1, VEGFA, APBB2, PTMS, TNRC6A, SRP9, SERP1	0.279335
GO:0045793~positive regulation of cell size	DERL2, KRT17, TNFRSF12A, LIMK1, CD81, N6AMT1	0.289088
GO:0006284~base-excision repair	MPG, UNG, POLD1, PCNA, POLB, PARP2	0.289088
GO:0042168~heme metabolic process	ALAS1, COX10, HMOX1, CPOX, HEBP1, IREB2	0.289088
GO:0043174~nucleoside salvage	HPRT, ADK, APRT	0.288683
GO:0043101~purine salvage	HPRT, ADK, APRT	0.288683
GO:0006166~purine ribonucleoside salvage	HPRT, ADK, APRT	0.288683
GO:0060742~epithelial cell differentiation involved in prostate gland development	RXRA, WDR77, TRP63, FEM1B, CTNNB1	0.296119
GO:0009200~deoxyribonucleoside triphosphate metabolic process	NUDT1, ADK, DGUOK, TBPL1, DUT	0.296119
GO:0032392~DNA geometric change	MCM7, MCM2, MCM4, MCM6, RAD51	0.296119
GO:0031570~DNA integrity checkpoint	CDK1, CCND1, NBN, MSH2, HUS1, TIPIN, FBXO31, CDT1	0.299583
GO:0006401~RNA catabolic process	EXOSC10, DCPS, DCP2, LSM6, MAGOH, EIF3E, LSM7, LSM5, MLH1, LSM2	0.300011
GO:0051495~positive regulation of cytoskeleton organization	CAV1, ARPC2, CAPZA2, RHOA, CENPE, APC, TES	0.299613
GO:0032269~negative regulation of cellular protein metabolic process	CAV1, MECP2, GIPC1, YWHAE, EIF4EBP1, ATG5, BAX, TIA1, JUN, TNRC6A, IGFBP3, SRP9, CR1L	0.299891
GO:0007015~actin filament organization	MTSS1, LIMA1, ENAH, GSN, FAT1, BCAR1, RHOA, PRKCI, ACTN1, PLS3, FLNA	0.301991
GO:0045893~positive regulation of transcription, DNA-dependent	ENY2, ELF1, HTATIP2, CASK, NFKB1, MED21, CBFB, CTNNB1, FUBP3, TRP63, USP16, TOP2A, ATF7IP, RARG, RXRA, MECP2, MED14, MED13, SMO, HIF1A, ZMIZ1, JUN, VEGFA, CLOCK, FUS, CNBP, UBE3A, NFIX, ARNT, HOXA1, BCL11B, POU2F1, TCEA1, TCF3, NFATC3, TFDP1, CREB1, SMAD5, SRA1, TRIM28, SNW1, ZFP148, AFF1, SREBF2, SP1, ETS1, GTF2F2, THRAP3, NFIC, NFIB	0.305198
GO:0009152~purine ribonucleotide biosynthetic process	ADSS, ATP5J2, ATP11A, GMPS, ATP5G3, AMPD3, PFAS, NME7, RP2H, NME4, ATP6V1C1, ATP6V1A, ATIC, ATP5C1, ADSL, PAICS, ATP5J	0.322712
GO:0051321~meiotic cell cycle	EXO1, NBN, MRE11A, SYCE2, MLH1, TOPBP1, PTTG1, SMC3, RAD50, CDC25B, RAD51, RPA1, CKS2, TUBG1, TRIP13	0.325701
GO:0051254~positive regulation of RNA metabolic process	ENY2, ELF1, HTATIP2, CASK, NFKB1, MED21, CBFB, CTNNB1, FUBP3, TRP63, USP16, TOP2A, ATF7IP, RARG, RXRA, MECP2, MED14, MED13, SMO, HIF1A, ZMIZ1, JUN, VEGFA, CLOCK, FUS, CNBP, UBE3A, NFIX, ARNT, HOXA1, BCL11B, POU2F1, TCEA1, TCF3, NFATC3, TFDP1, CREB1, SMAD5, SRA1, TRIM28, SNW1, ZFP148, AFF1, SREBF2, SP1, ETS1, GTF2F2, THRAP3, NFIC, NFIB	0.332557
GO:0031577~spindle checkpoint	PSMG2, CENPE, BIRC5, APC	0.332656
GO:0006613~cotranslational protein targeting to membrane	ARL6IP1, SRP72, SRP9, SSR3	0.332656
GO:0000726~non-recombinational repair	XRCC4, XRCC6, POLA1, MLH1	0.332656
GO:0006303~double-strand break repair via nonhomologous end joining	XRCC4, XRCC6, POLA1, MLH1	0.332656
GO:0051168~nuclear export	NUP133, PHAX, NUP160, GSK3B, STRADA, LSG1, HSPA9	0.335676
GO:0009060~aerobic respiration	SUCLG2, COX10, SDHD, CAT, IDH3A, MDH2, MDH1	0.335676
GO:0016567~protein ubiquitination	BMI1, PRPF19, SUZ12, UBE3A, RNF2, WWP1, SKP2, NSMCE2, RNF168, PCNP, ITCH, TRIM23	0.348708
GO:0001837~epithelial to mesenchymal transition	HIF1A, TRIM28, PPP3R1, RBPJ, WDR92	0.34999
GO:0006417~regulation of translation	PAIP1, MAGOH, IREB2, MKNK1, IGF2BP2, QK, TRNAU1AP, EIF4EBP1, EIF4E, KRT17, TIA1, EIF2S1, PTMS, TNRC6A, SRP9, SERP1	0.350014
GO:0051052~regulation of DNA metabolic process	MSH6, MSH2, USP1, GMNN, WRNIP1, HUS1, PCNA, TIPIN, MLH1, RNF168, CDT1	0.348894
GO:0010604~positive regulation of macromolecule metabolic process	ENY2, ELF1, HTATIP2, TBK1, CASK, NFKB1, CTCF, PAWR, MED21, CBFB, CTNNB1, FUBP3, TRP63, ITCH, USP16, MKL1, CCNA2, TOP2A, PSMD9, ATF7IP, RARG, RXRA, ZFP326, MECP2, MED14, MED13, CDK2, SMO, HIF1A, KRT17, ZMIZ1, JUN, VEGFA, CD81, PTMS, CLOCK, SERP1, FUS, CNBP, UBE3A, BMPR2, NFIX, ARNT, HOXA1, BCL11B, POU2F1, RNF168, TCEA1, TRAF6, NFATC3, ING1, TCF3, APC, TFDP1, CREB1, TRIM28, SMAD5, SRA1, SNW1, AFF1,…	0.35719
GO:0046822~regulation of nucleocytoplasmic transport	KHDRBS1, SMO, GSK3B, PPP1R12A, PRKACA, TACC3, MBTPS1, FLNA	0.359889
GO:0006338~chromatin remodeling	RBBP4, BAZ1A, BAZ1B, NASP, BNIP3, ACTL6A, RBBP7, HELLS	0.359889
GO:0016573~histone acetylation	BMI1, MEAF6, MECP2, HAT1, ACTL6A, RUVBL2, RUVBL1, TCF3	0.359889
GO:0030835~negative regulation of actin filament depolymerization	LIMA1, GSN, CAPZA2, CAPZA1, TMOD3, RDX	0.37475
GO:0032507~maintenance of protein location in cell	KDELR2, NUF2, CENPE, TACC3, TNRC6A, FLNA	0.37475
GO:0009150~purine ribonucleotide metabolic process	ADSS, ATP5J2, GMPR2, ATP11A, GMPS, ATP5G3, AMPD3, PFAS, NME7, RP2H, NME4, ATP6V1C1, ATP6V1A, ATIC, ATP5C1, ADSL, PAICS, ATP5J	0.374284
GO:0045333~cellular respiration	SLC25A12, SUCLG2, COX10, SDHD, MECP2, CAT, SDHAF2, NFATC3, IDH3A, MDH2, MDH1	0.373008
GO:0045934~negative regulation of nucleobase, nucleoside, nucleotide and nucleic acid metabolic process	BMI1, EID1, HUS1, TIPIN, MLH1, HAT1, NFKB1, CBX1, CTNNB1, CDT1, ZKSCAN17, WWP1, PRMT6, ATF6B, TRP63, POU2F1, DDX20, DNMT3B, HELLS, KHDRBS1, ATF7IP, DNMT3A, MSH6, CTBP2, RARG, MSH2, GMNN, RBL1, GABPA, TRIM28, TRIM27, MECP2, SNW1, RBBP7, GZF1, SUZ12, CTNNBIP1, HDAC1, YAF2, RNF2, DNMT1, ZFP281, ATPIF1, RBPJ, NFIC, DNAJB6, C1D	0.398166
GO:0045944~positive regulation of transcription from RNA polymerase II promoter	FUS, CNBP, ELF1, HTATIP2, UBE3A, CASK, NFKB1, NFIX, MED21, CBFB, CTNNB1, ARNT, HOXA1, FUBP3, BCL11B, TRP63, POU2F1, TCEA1, NFATC3, TCF3, TOP2A, RARG, RXRA, CREB1, SMAD5, SRA1, SNW1, MED14, ZFP148, MED13, SREBF2, SMO, HIF1A, SP1, ETS1, ZMIZ1, JUN, GTF2F2, THRAP3, VEGFA, NFIC, CLOCK, NFIB	0.40052
GO:0006096~glycolysis	TPI1, LDHA, PFKL, PFKP, HK1, PGK1, GAPDH, MDH2, MDH1	0.404073
GO:0000059~protein import into nucleus, docking	CSE1L, IPO11, IPO8, KPNB1, TNPO1	0.406613
GO:0010259~multicellular organismal aging	MSH6, ERCC5, MSH2, TRP63, SERP1	0.406613
GO:0030029~actin filament-based process	MTSS1, LIMA1, ENAH, ROCK2, CAPZA2, BCAR1, CAPZA1, PRKCI, ACTN1, CSRP1, RACGAP1, VASP, FLNA, CORO1C, EPB4.1L2, EPB4.1L3, GSN, FAT1, ACAP2, RHOA, SHC1, APBB2, EHD2, PLS3	0.409493
GO:0016197~endosome transport	HOOK1, VPS4B, MCOLN1, EHD1, VPS36, FLNA, RHOBTB3	0.410867
GO:0033151~V(D)J recombination	XRCC4, BCL11B, XRCC6, TCF3	0.409589
GO:0007131~reciprocal meiotic recombination	MLH1, TOPBP1, RAD51, TRIP13	0.409589
GO:0046112~nucleobase biosynthetic process	HPRT, DHODH, PPAT, APRT	0.409589
GO:0016574~histone ubiquitination	BMI1, SUZ12, RNF2, RNF168	0.409589
GO:0034470~ncRNA processing	PUS3, EXOSC8, RRP1, EXOSC9, EXOSC7, LSM6, UTP15, EXOSC3, RPP14, EXOSC10, NOP14, DIMT1, DIS3, DCAF13, TRMT11, DKC1, RPP30, POP4, CDK5RAP1, RPP40, TSEN15, C1D	0.415332
GO:0045814~negative regulation of gene expression, epigenetic	DNMT3A, TRIM27, MECP2, HAT1, DNMT3B, HELLS	0.416599
GO:0006213~pyrimidine nucleoside metabolic process	NME4, RP2H, DHODH, NME7, TBPL1, DUT	0.416599
GO:0031327~negative regulation of cellular biosynthetic process	BMI1, NFKB1, CBX1, CDT1, CTNNB1, EIF4EBP1, DYNLL1, TIA1, WWP1, ATF6B, PRMT6, TRP63, DDX20, KHDRBS1, ATF7IP, CTBP2, RARG, RBL1, GABPA, MECP2, RBBP7, GZF1, CTNNBIP1, SUZ12, SRP9, C1D, EID1, CAV1, HUS1, TIPIN, HAT1, ZKSCAN17, POU2F1, DNMT3B, TNRC6A, HELLS, DNMT3A, GMNN, TRIM28, TRIM27, SNW1, BRCA1, HDAC1, YAF2, RNF2, DNMT1, ZFP281, RBPJ, NFIC, DNAJB6	0.420399
GO:0031557~induction of programmed cell death in response to chemical stimulus	BAX, MAPK9, MAPK8	0.426562
GO:0010216~maintenance of DNA methylation	DNMT1, CTCF, HELLS	0.426562
GO:0007091~mitotic metaphase/anaphase transition	BUB1B, CDC27, APC	0.426562
GO:0006188~IMP biosynthetic process	ATIC, PAICS, PFAS	0.426562
GO:0031558~induction of apoptosis in response to chemical stimulus	BAX, MAPK9, MAPK8	0.426562
GO:0006287~base-excision repair, gap-filling	POLD1, PCNA, POLB	0.426562
GO:0046040~IMP metabolic process	ATIC, PAICS, PFAS	0.426562
GO:0009221~pyrimidine deoxyribonucleotide biosynthetic process	TYMS, DTYMK, TBPL1	0.426562
GO:0046394~carboxylic acid biosynthetic process	MAT2A, PRKAG2, AMACR, NDUFAB1, ASNS, CBR4, BRCA1, QK, MTHFD1, PECR, CTH, TPI1, DHFR, ELOVL5, PHGDH, LTA4H, LIAS, 2010111I01RIK, HPGDS, DEGS1	0.437185
GO:0016053~organic acid biosynthetic process	MAT2A, PRKAG2, AMACR, NDUFAB1, ASNS, CBR4, BRCA1, QK, MTHFD1, PECR, CTH, TPI1, DHFR, ELOVL5, PHGDH, LTA4H, LIAS, 2010111I01RIK, HPGDS, DEGS1	0.437185
GO:0000077~DNA damage checkpoint	CDK1, CCND1, NBN, MSH2, HUS1, TIPIN, FBXO31	0.449337
GO:0006357~regulation of transcription from RNA polymerase II promoter	BMI1, ELF1, ELF2, HTATIP2, CASK, NFKB1, MED21, CBFB, CTNNB1, MAGED1, FUBP3, WDR77, TRP63, RHOA, DDX20, TOP2A, ATF7IP, RARG, RXRA, GABPA, RBL1, MED14, MED13, ECSIT, RBBP7, GZF1, CTNNBIP1, SUZ12, SMO, HIF1A, MED15, ZMIZ1, JUN, MED18, VEGFA, SMARCAL1, CLOCK, FUS, EID1, CNBP, UBE3A, NFIX, ARNT, HOXA1, ZKSCAN17, BCL11B, POU2F1, TCEA1, NFATC3, TCF3, DNMT3A, CREB1, TRIM28, SMAD5, SRA1, TRIM27, SNW1, ZFP…	0.448562
GO:0007126~meiosis	EXO1, NBN, MRE11A, SYCE2, MLH1, TOPBP1, PTTG1, RAD50, SMC3, CDC25B, RAD51, RPA1, CKS2, TRIP13	0.454096
GO:0051327~M phase of meiotic cell cycle	EXO1, NBN, MRE11A, SYCE2, MLH1, TOPBP1, PTTG1, RAD50, SMC3, CDC25B, RAD51, RPA1, CKS2, TRIP13	0.454096
GO:0009890~negative regulation of biosynthetic process	BMI1, NFKB1, CBX1, CDT1, CTNNB1, EIF4EBP1, DYNLL1, TIA1, WWP1, ATF6B, PRMT6, TRP63, DDX20, KHDRBS1, ATF7IP, CTBP2, RARG, RBL1, GABPA, MECP2, RBBP7, GZF1, CTNNBIP1, SUZ12, SRP9, C1D, EID1, CAV1, HUS1, TIPIN, HAT1, ZKSCAN17, POU2F1, DNMT3B, TNRC6A, HELLS, DNMT3A, GMNN, TRIM28, TRIM27, SNW1, BRCA1, HDAC1, YAF2, RNF2, DNMT1, ZFP281, RBPJ, NFIC, DNAJB6	0.45434
GO:0030071~regulation of mitotic metaphase/anaphase transition	PSMG2, CENPE, ANAPC10, NEK6, APC	0.459387
GO:0001832~blastocyst growth	GINS1, PRPF19, NBN, NCAPG2, HBEGF	0.459387
GO:0009147~pyrimidine nucleoside triphosphate metabolic process	NME4, RP2H, NME7, TBPL1, DUT	0.459387
GO:0000079~regulation of cyclin-dependent protein kinase activity	CDK5RAP3, BCCIP, CDK5RAP1, LATS2, APC	0.459387
GO:0051402~neuron apoptosis	AIFM1, BAX, TRP63, BNIP3, APAF1	0.459387
GO:0051262~protein tetramerization	MTMR2, CBR2, PCBD2, HPRT, ATPIF1, USP16	0.460815
GO:0008630~DNA damage response, signal transduction resulting in induction of apoptosis	MSH6, AEN, HMOX1, TRP63, MLH1, BRCA1	0.460815
GO:0009314~response to radiation	MSH6, XRCC4, MAT2A, MSH2, USP1, HUS1, XRCC6, MECP2, TIPIN, CHEK2, SNAI2, IKBIP, ERCC5, PDE6D, BAX, CASP7, AEN, MAPK8, RNF168, ERCC4	0.467773
GO:0007595~lactation	CCND1, CAV1, CREB1, CAPZA2, MET, VEGFA, TES	0.487456
GO:0046489~phosphoinositide biosynthetic process	PIGF, CD81, ADNP, DPM1, PIGC, PIGS, PIGA	0.487456
GO:0031575~G1/S transition checkpoint	CCND1, NBN, HUS1, FBXO31	0.486748
GO:0031116~positive regulation of microtubule polymerization	CAV1, CAPZA2, APC, TES	0.486748
GO:0030866~cortical actin cytoskeleton organization	EPB4.1L2, CORO1C, EPB4.1L3, EHD2	0.486748
GO:0031112~positive regulation of microtubule polymerization or depolymerization	CAV1, CAPZA2, APC, TES	0.486748
GO:0009219~pyrimidine deoxyribonucleotide metabolic process	TYMS, DTYMK, TBPL1, DUT	0.486748
GO:0032880~regulation of protein localization	TRAF2, SEPT2, PANX1, PRKCI, RABGAP1L, CENPE, TACC3, FLNA, SMO, GSK3B, PRKACA, TRAF6, MBTPS1, APC	0.496786
GO:0034660~ncRNA metabolic process	PUS3, NARS, LSM6, UTP15, RPP14, EXOSC10, DIMT1, DCAF13, DKC1, HARS2, RPP30, CDK5RAP1, TPR, TSEN15, EXOSC8, EXOSC9, RRP1, EXOSC7, EXOSC3, DIS3, NOP14, TRMT11, YARS2, POP4, RPP40, C1D	0.507471
GO:0030834~regulation of actin filament depolymerization	LIMA1, GSN, CAPZA2, CAPZA1, TMOD3, RDX	0.508482
GO:0042278~purine nucleoside metabolic process	MAT2A, HPRT, ADK, PCMT1, APRT, DCAKD	0.508482
GO:0046128~purine ribonucleoside metabolic process	MAT2A, HPRT, ADK, PCMT1, APRT, DCAKD	0.508482
GO:0043543~protein amino acid acylation	BMI1, MEAF6, NAA50, MECP2, HAT1, ACTL6A, RUVBL2, RUVBL1, TCF3	0.524056
GO:0030036~actin cytoskeleton organization	MTSS1, LIMA1, ENAH, ROCK2, CAPZA2, BCAR1, CAPZA1, PRKCI, ACTN1, CSRP1, RACGAP1, VASP, FLNA, CORO1C, EPB4.1L2, EPB4.1L3, GSN, FAT1, RHOA, SHC1, EHD2, PLS3	0.522683
GO:0030522~intracellular receptor-mediated signaling pathway	YWHAH, RARG, UBE3A, RXRA, TAF7, RHOA, NR3C1	0.52489
GO:0043009~chordate embryonic development	BMI1, GNA13, STIL, XRCC4, FKBP8, ENAH, NBN, LIMS1, COPS3, PITPNB, MED21, ARNT, PRPF19, CUL3, RPA1, PRMT1, FBXW8, LY6E, NCAPG2, CASP8, DAD1, TRAF6, NSDHL, GINS1, EGFR, MSH2, NASP, TGFBR1, GABPA, AMBRA1, MBNL1, CAPN2, BRCA1, VASP, SMO, WNT7B, TULP3, HIF1A, CCNB2, SP1, ZMIZ1, SP3, TSC2, PHGDH, HBEGF, APAF1, CR1L, DNAJB6	0.533266
GO:0007369~gastrulation	CUL3, NF2, RNF2, PRKAR1A, HIRA, BMPR2, LRP6, UGDH, PRKACA, EXT1, ECSIT, CTNNB1	0.531915
GO:0021915~neural tube development	BMI1, STIL, ENAH, FKBP8, AMBRA1, VASP, SMO, TULP3, TSC2, CASP8, PHGDH, APAF1, TRAF6	0.535724
GO:0001558~regulation of cell growth	DERL2, NDN, TNFRSF12A, LIMK1, TTL, N6AMT1, EI24, KRT17, CD81, TRP63, NDUFS3, APBB2, IGFBP3, DNAJC2	0.53623
GO:0051651~maintenance of location in cell	KDELR2, NUF2, CENPE, TACC3, TNRC6A, FLNA	0.551875
GO:0006984~ER-nuclear signaling pathway	CCND1, DERL2, VAPB, GSK3B, HSPA5, SERP1	0.551875
GO:0006346~methylation-dependent chromatin silencing	DNMT3A, DNMT3B, HELLS	0.553133
GO:0043094~cellular metabolic compound salvage	HPRT, ADK, APRT	0.553133
GO:0009048~dosage compensation, by inactivation of X chromosome	SMCHD1, CTCF, BRCA1	0.553133
GO:0030174~regulation of DNA replication initiation	WRNIP1, TIPIN, CDT1	0.553133
GO:0007052~mitotic spindle organization	SPC25, TUBG1, SMC3	0.553133
GO:0009113~purine base biosynthetic process	HPRT, PPAT, APRT	0.553133
GO:0051798~positive regulation of hair follicle development	KRT17, FST, TRADD	0.553133
GO:0044272~sulfur compound biosynthetic process	MTHFD1, CTH, MAT2A, CHST14, LIAS, EXT1, GLCE, HS2ST1	0.558737
GO:0007173~epidermal growth factor receptor signaling pathway	EGFR, BCAR1, HBEGF, SRC	0.558079
GO:0007090~regulation of S phase of mitotic cell cycle	DBF4, ATF6B, APBB2, CDT1	0.558079
GO:0006144~purine base metabolic process	HPRT, AMPD3, PPAT, APRT	0.558079
GO:0009148~pyrimidine nucleoside triphosphate biosynthetic process	NME4, RP2H, NME7, TBPL1	0.558079
GO:0008156~negative regulation of DNA replication	GMNN, HUS1, TIPIN, CDT1	0.558079
GO:0009792~embryonic development ending in birth or egg hatching	BMI1, GNA13, STIL, XRCC4, FKBP8, ENAH, NBN, LIMS1, COPS3, PITPNB, MED21, ARNT, PRPF19, CUL3, RPA1, PRMT1, FBXW8, LY6E, NCAPG2, CASP8, DAD1, TRAF6, NSDHL, GINS1, EGFR, MSH2, NASP, TGFBR1, GABPA, AMBRA1, MBNL1, CAPN2, BRCA1, VASP, SMO, WNT7B, TULP3, HIF1A, CCNB2, SP1, ZMIZ1, SP3, TSC2, PHGDH, HBEGF, APAF1, CR1L, DNAJB6	0.557172
GO:0010948~negative regulation of cell cycle process	PSMG2, ATF6B, CENPE, APBB2, APC	0.566959
GO:0000070~mitotic sister chromatid segregation	PDS5B, ATF6B, NCAPD3, BUB3, SMC4	0.566959
GO:0008283~cell proliferation	NBN, HPRT, E2F8, FST, POLA1, SRC, CTNNB1, PRPF19, MCM7, CSE1L, NCAPG2, TRP63, HELLS, GINS1, RXRA, NASP, SRA1, MET, RACGAP1, TACC3, APPL1, PARK7, CCND1, UHRF1, CCND3, GSK3B, BAX, PRKAR1A, VEGFA, RAP1B	0.584828
GO:0010558~negative regulation of macromolecule biosynthetic process	BMI1, EID1, HUS1, TIPIN, HAT1, NFKB1, CBX1, CTNNB1, CDT1, EIF4EBP1, ZKSCAN17, WWP1, TIA1, PRMT6, ATF6B, TRP63, POU2F1, DDX20, TNRC6A, DNMT3B, HELLS, KHDRBS1, ATF7IP, DNMT3A, CTBP2, RARG, GMNN, RBL1, GABPA, TRIM28, TRIM27, MECP2, SNW1, RBBP7, GZF1, SUZ12, CTNNBIP1, HDAC1, YAF2, RNF2, DNMT1, ZFP281, RBPJ, NFIC, SRP9, DNAJB6, C1D	0.589599
GO:0032386~regulation of intracellular transport	KHDRBS1, SMO, GSK3B, PPP1R12A, PRKACA, TACC3, MBTPS1, FLNA	0.59027
GO:0009451~RNA modification	DIMT1, PUS3, RPUSD4, DNAJB11, DKC1, TGS1, CDK5RAP1, PUS7	0.59027
GO:0006778~porphyrin metabolic process	ALAS1, COX10, HMOX1, CPOX, HEBP1, IREB2	0.592023
GO:0043392~negative regulation of DNA binding	IRAK2, SMO, HMOX1, CAT, DNAJA3, FLNA	0.592023
GO:0034976~response to endoplasmic reticulum stress	CCND1, DERL2, VAPB, GSK3B, HSPA5, SERP1	0.592023
GO:0033013~tetrapyrrole metabolic process	ALAS1, COX10, HMOX1, CPOX, HEBP1, IREB2	0.592023
GO:0048729~tissue morphogenesis	STIL, ENAH, FST, BMPR2, JAG2, NR3C1, FEM1B, SRC, CTNNB1, PGP, LY6E, CASP8, TRP63, SEMA3C, PRKACA, TRAF6, EGFR, RARG, NF2, RXRA, GRSF1, ECSIT, VASP, GZF1, KRT17, PTCD2, PRKAR1A, TSC2, APAF1	0.592043
GO:0001525~angiogenesis	COL18A1, GNA13, HTATIP2, TNFRSF12A, SMAD5, NAA15, ELK3, CTNNB1, ANXA2, SEMA5A, HIF1A, NUS1, HMOX1, VEGFA, CASP8, HBEGF, SHC1, RBPJ	0.614156
GO:0009112~nucleobase metabolic process	HPRT, DHODH, AMPD3, PPAT, APRT	0.620323
GO:0051693~actin filament capping	GSN, CAPZA2, CAPZA1, TMOD3, RDX	0.620323
GO:0000819~sister chromatid segregation	PDS5B, ATF6B, NCAPD3, BUB3, SMC4	0.620323
GO:0032273~positive regulation of protein polymerization	CAV1, ARPC2, CAPZA2, APC, TES	0.620323
GO:0060541~respiratory system development	RARG, CAPZA2, PPP3R1, BMPR2, L7RN6, WDR92, CTNNB1, TULP3, SP1, JMJD6, DHCR7, WWP1, SP3, VEGFA, POU2F1, NFIB, TES	0.62035
GO:0008213~protein amino acid alkylation	SUZ12, LCMT1, PRMT1, EZH2, PRMT6, MECP2, PCMT1, SETD2	0.620763
GO:0006479~protein amino acid methylation	SUZ12, LCMT1, PRMT1, EZH2, PRMT6, MECP2, PCMT1, SETD2	0.620763
GO:0043244~regulation of protein complex disassembly	LIMA1, GSN, CAPZA2, CAPZA1, TMOD3, RDX, PTMS, APC	0.620763
GO:0009064~glutamine family amino acid metabolic process	GFPT1, MECP2, PHGDH, ASNS, CTPS2, GMPS, PFAS, FAH	0.620763
GO:0045786~negative regulation of cell cycle	PSMG2, GMNN, ATF6B, CENPE, APBB2, CDK5RAP1, LATS2, APC	0.620763
GO:0016331~morphogenesis of embryonic epithelium	STIL, PGP, ENAH, CASP8, TSC2, TRP63, GRSF1, JAG2, APAF1, TRAF6, VASP, CTNNB1	0.620596
GO:0001937~negative regulation of endothelial cell proliferation	CAV1, CAPZA2, ATPIF1, TES	0.623801
GO:0046824~positive regulation of nucleocytoplasmic transport	SMO, GSK3B, PRKACA, FLNA	0.623801
GO:0031113~regulation of microtubule polymerization	CAV1, CAPZA2, APC, TES	0.623801
GO:0043968~histone H2A acetylation	MEAF6, ACTL6A, RUVBL2, RUVBL1	0.623801
GO:0006349~genetic imprinting	DNMT3A, MECP2, CTCF, DNMT3B	0.623801
GO:0009218~pyrimidine ribonucleotide metabolic process	NME4, RP2H, DHODH, NME7	0.623801
GO:0009220~pyrimidine ribonucleotide biosynthetic process	NME4, RP2H, DHODH, NME7	0.623801
GO:0043242~negative regulation of protein complex disassembly	LIMA1, GSN, CAPZA2, CAPZA1, TMOD3, RDX, APC	0.628907
GO:0007127~meiosis I	CKS2, SYCE2, MLH1, TOPBP1, PTTG1, RAD51, TRIP13	0.628907
GO:0030097~hemopoiesis	XRCC4, GMPR2, JAG2, TTC7, CIAPIN1, CBFB, CTNNB1, RPA1, PICALM, BCL11B, WWP1, CASP8, TCEA1, TRAF6, TCF3, HELLS, DNAJA3, APC, SGPL1, MSH2, SMAD5, CDK6, TACC3, HIF1A, SP1, JMJD6, SP3, BAX, VEGFA, RBPJ	0.627945
GO:0048534~hemopoietic or lymphoid organ development	XRCC4, GMPR2, JAG2, NFKB1, TTC7, CIAPIN1, CBFB, CTNNB1, RPA1, PICALM, BCL11B, WWP1, CASP8, TCEA1, TRAF6, TCF3, HELLS, DNAJA3, APC, SGPL1, MSH2, TGFBR1, SMAD5, CDK6, TACC3, CCNB2, HIF1A, SP1, JMJD6, SP3, BAX, VEGFA, RBPJ	0.628067
GO:0055114~oxidation reduction	CYB5R1, LDHA, PXDN, HTATIP2, GMPR2, NDUFAB1, PRDX4, NUP188, MTHFD1, PECR, HIF1AN, P4HA2, HMOX1, CPOX, GPX8, CAT, NDUFS3, TXNL1, CTBP2, AIFM1, CYCS, QDPR, MECP2, CBR4, CYB5B, CBR3, GRHPR, NDUFC1, COQ7, NDUFA12, MOXD1, ALDH7A1, ADO, RRM1, MDH2, DEGS1, MDH1, TMX1, ACADSB, NDUFB6, ME2, GLUD1, HSD17B12, UGDH, ADH5, SDHAF2, FTH1, NDUFB2, CYB561D2, CBR2, DHCR7, DHODH, GAPDH, QSOX1, HSD17B7, NSDHL, NDUFA…	0.626926
GO:0009798~axis specification	STIL, RNF2, LRP6, PCSK6, CTNNB1, APC	0.625969
GO:0010638~positive regulation of organelle organization	CAV1, ROCK2, ARPC2, CAPZA2, RHOA, RANBP1, CENPE, APC, TES	0.626779
GO:0019320~hexose catabolic process	TPI1, LDHA, PFKL, PFKP, HK1, PGK1, GAPDH, MDH2, MDH1	0.626779
GO:0006007~glucose catabolic process	TPI1, LDHA, PFKL, PFKP, HK1, PGK1, GAPDH, MDH2, MDH1	0.626779
GO:0007005~mitochondrion organization	GGCT, COX10, AIFM1, MTX2, BNIP3, AIP, TFAM, NRF1, HTRA2, PTCD2, BAX, CASP7, TIMM9, DNAJA3	0.628759
GO:0007242~intracellular signaling cascade	GNA13, CTNNAL1, NBN, GNA11, IQGAP3, MLH1, LPAR2, ITSN1, LATS2, ARHGAP5, HMOX1, AEN, ATF6B, TRP63, RHOA, RALB, RAPGEF6, RAB24, SHC1, DEPDC1A, TLK1, SPRED1, RHOD, PRKACB, TLK2, RAPGEF1, NET1, MAP2K5, IRAK2, RAP2A, CDK1, SRPK2, RSU1, BCR, TWF2, RARG, PIK3C2A, ROCK2, RXRA, PRKCI, G3BP2, ARHGAP29, FLNA, SRPK1, STK3, FARP2, SPAG9, MAP4K5, CCND1, CD81, MAPK9, MAPK8, RALGPS2, CAV1, ADORA2B, UBE3A, HUS1, …	0.637004
GO:0015980~energy derivation by oxidation of organic compounds	COX10, SUCLG2, MECP2, SDHAF2, IDH3A, SLC25A12, PPP1R2, GBE1, SDHD, GYG, CAT, NFATC3, MDH2, MDH1	0.650051
GO:0006108~malate metabolic process	ME2, MDH2, MDH1	0.649864
GO:0009215~purine deoxyribonucleoside triphosphate metabolic process	NUDT1, ADK, DGUOK	0.649864
GO:0009151~purine deoxyribonucleotide metabolic process	NUDT1, ADK, DGUOK	0.649864
GO:0070507~regulation of microtubule cytoskeleton organization	CAV1, ROCK2, CAPZA2, RANBP1, CENPE, APC, TES	0.657042
GO:0007088~regulation of mitosis	YWHAH, PSMG2, CENPE, ANAPC10, TUBG1, NEK6, APC	0.657042
GO:0051783~regulation of nuclear division	YWHAH, PSMG2, CENPE, ANAPC10, TUBG1, NEK6, APC	0.657042
GO:0043523~regulation of neuron apoptosis	XRCC4, MSH2, BAX, MECP2, ADNP, RHOA, DPM1, BIRC5, DNAJC5, NR3C1, ITSN1, RASA1	0.656709
GO:0006342~chromatin silencing	DNMT3A, MECP2, HAT1, DNMT3B, HELLS	0.656158
GO:0010639~negative regulation of organelle organization	LIMA1, PSMG2, GSN, CAPZA2, CAPZA1, MECP2, TMOD3, CENPE, RDX, APC	0.65531
GO:0045185~maintenance of protein location	KDELR2, NUF2, CENPE, TACC3, TNRC6A, FLNA	0.660622
GO:0032886~regulation of microtubule-based process	CAV1, ROCK2, CAPZA2, RANBP1, CENPE, TACC3, APC, TES	0.670154

## Sheet: miR-203 knockout analysis
GO terms
All genesupregulated by miR-203 ablation in primary cells (riboseq and rnaseq) and epidermis (microarray)
GO (biological process)
Term	Genes	P-value (adjusted)
GO:0006396~RNA processing	PUS3, STRAP, TRA2A, SNRPB2, INTS2, SF3B5, SF3B3, DDX46, CNOT6L, PCBP1, HNRNPF, CTU2, NUDT21, TRMT5, SCNM1, LSM2, PTBP2, GEMIN7, UTP23, SRPK2, TRMU, MOCS3, EMG1, LCMT2, PRPF3, EXOSC1, TRMT61A, SF3A1, RNMTL1, SRPK1, WDR83, URM1, TARBP2, WDR4, ESRP2, PES1, SNRPE, XRN2, TXNL4A, SNRPG	0.00135118
GO:0008285~negative regulation of cell proliferation	TRP53, PPARD, CAV1, BECN1, INPPL1, NDFIP1, CD276, FOXO4, TAX1BP3, CD24A, FTH1, FNTB, DDR1, CD9, EREG, WDR77, TBRG1, TSC2, TGIF1, GLMN, RBPJ, APC, TES	0.0466729
GO:0006974~response to DNA damage stimulus	ZMAT3, POLA1, PRKDC, CHEK2, FOXO4, MIF, TRIAP1, ACD, PRMT6, FBXO6, DYRK2, CRY1, ERCC4, ERCC1, FANCB, APC, TRP53, PGAP2, NUDT1, UBE2B, EYA3, CCND1, BTG2, CUL4A, BRE, XRN2	0.0688844
GO:0033554~cellular response to stress	VAPB, ZMAT3, POLA1, PRKDC, CHEK2, FOXO4, MIF, TRIAP1, ACD, PRMT6, FBXO6, DYRK2, CRY1, ERCC4, TNRC6A, ERCC1, FANCB, APC, CDC42EP5, TRP53, PGAP2, NUDT1, UBE2B, EYA3, CCND1, HIF1A, BTG2, CUL4A, GSK3B, BRE, MAPK8, XRN2	0.0833374
GO:0006397~mRNA processing	SRPK2, STRAP, SNRPB2, TRA2A, PRPF3, SF3B5, SF3A1, SRPK1, SF3B3, WDR83, DDX46, CNOT6L, HNRNPF, PCBP1, NUDT21, SCNM1, ESRP2, PTBP2, LSM2, GEMIN7, SNRPE, XRN2, TXNL4A, SNRPG	0.0693575
GO:0046907~intracellular transport	VPS29, SNX9, SEC24B, XPO5, USE1, TRAPPC2L, DSCR3, CD24A, HOOK3, AP2B1, KLC1, PEX16, MCOLN1, GLE1, TNPO1, SEC24D, TRP53, ASPSCR1, SCAMP3, PICK1, ERGIC3, COG5, AP2A2, TOM1L2, GSK3B, SLC25A10, TSC2, TBRG1, SEC13, GOSR2, RAB10, GGA3, COPE	0.0802819
GO:0008380~RNA splicing	SRPK2, STRAP, SNRPB2, TRA2A, PRPF3, SF3B5, SF3A1, SRPK1, SF3B3, WDR83, DDX46, HNRNPF, SCNM1, ESRP2, PTBP2, LSM2, GEMIN7, SNRPE, TXNL4A, SNRPG	0.0709949
GO:0006400~tRNA modification	URM1, PUS3, MOCS3, CTU2, WDR4, TRMT61A	0.0636112
GO:0006412~translation	RPL18, EIF6, EEF1B2, RPL35, RPLP2, QARS, RPS27L, RPL31, EIF3E, RPL8, EIF3K, EIF3L, MRPS21, EEF2, EIF1B, MRPS6, RPS5, RPS7, MRPL23, RPS19, RPL18A, MRPS18B, MRPS18A, YARS2, RPS11, EIF4E2	0.113971
GO:0016071~mRNA metabolic process	STRAP, SNRPB2, TRA2A, SF3B5, SF3B3, DDX46, CNOT6L, HNRNPF, EIF3E, PCBP1, NUDT21, SCNM1, PTBP2, LSM2, GEMIN7, SRPK2, PRPF3, SF3A1, SRPK1, WDR83, ESRP2, SNRPE, XRN2, SNRPG, TXNL4A	0.108637
GO:0015031~protein transport	VPS29, SNX18, SNX9, SEC24B, EXOC7, RAB5C, XPO5, ZMAT3, USE1, CD24A, HOOK3, NXT2, AP2B1, MIA3, GORASP1, PEX16, RAB11B, RAB24, GLE1, SEC24D, TNPO1, KDELR1, SYS1, EIF4ENIF1, TRP53, ASPSCR1, SCAMP3, VPS18, PICK1, NUPL2, COG5, AP2A2, SEC61B, RABEP2, TOM1L2, GSK3B, RAB34, TSC2, SEC13, GOSR2, RAB10, GGA3, COPE	0.100589
GO:0045184~establishment of protein localization	VPS29, SNX18, SNX9, SEC24B, EXOC7, RAB5C, XPO5, ZMAT3, USE1, CD24A, HOOK3, NXT2, AP2B1, MIA3, GORASP1, PEX16, RAB11B, RAB24, GLE1, SEC24D, TNPO1, KDELR1, SYS1, EIF4ENIF1, TRP53, ASPSCR1, SCAMP3, VPS18, PICK1, NUPL2, COG5, AP2A2, SEC61B, RABEP2, TOM1L2, GSK3B, RAB34, TSC2, SEC13, GOSR2, RAB10, GGA3, COPE	0.107324
GO:0048193~Golgi vesicle transport	VPS29, COG5, SEC24B, USE1, TRAPPC2L, SEC13, SEC24D, COPE, ERGIC3	0.112399
GO:0042770~DNA damage response, signal transduction	TRP53, PGAP2, TRIAP1, CCND1, BRE, DYRK2, CHEK2, FOXO4, MIF	0.186257
GO:0008104~protein localization	VPS29, SNX18, SNX9, OXA1L, SEC24B, CAV1, EXOC7, RAB5C, XPO5, ZMAT3, USE1, CD24A, HOOK3, NXT2, AP2B1, MIA3, GORASP1, PEX16, RAB11B, RAB24, GLE1, SEC24D, TNPO1, TNRC6A, KDELR1, SYS1, EIF4ENIF1, TRP53, ASPSCR1, SCAMP3, VPS18, PICK1, NUPL2, COG5, AP2A2, SEC61B, RABEP2, TOM1L2, GSK3B, RAB34, TSC2, SEC13, GOSR2, RAB10, GGA3, COPE	0.220359
GO:0006091~generation of precursor metabolites and energy	NDUFB5, UQCRC1, NDUFA8, FDX1, IL6ST, NDUFAB1, ATP6V1H, NDUFC1, GPI1, ATP5G3, NDUFB2, AKT1, ATP6V1C1, GBE1, IDH3G, ATP5L, GNAS, ATP5A1, NDUFS2, GAPDH, MDH1	0.27047
GO:0030163~protein catabolic process	PSMB10, UBE2Z, USP3, USE1, VPRBP, TRIM11, AKT1, UBE2D3, MGRN1, PPP2CB, PSMB2, FBXO28, FBXO6, RBCK1, HECTD3, DDA1, USP32, ANAPC1, LRRC41, CBL, UBE2B, NAE1, URM1, PSMA1, DCUN1D1, CUL4A, KCMF1, UBA3, RNF139, PIAS2, USP22, ANAPC7, PIAS1, TNFAIP3, FBXO11, RNF41	0.258819
GO:0042127~regulation of cell proliferation	FGFR2, BMI1, PPARD, CAV1, CNBP, IL6ST, JAG2, FOXO4, CD24A, FTH1, MIF, FNTB, CD9, WDR77, ILK, APC, TES, TRP53, KLF5, INPPL1, CRIP2, BECN1, CD276, NDFIP1, TAX1BP3, DDR1, EREG, SERPINB5, LAMA5, TSC2, TBRG1, TGIF1, GLMN, HBEGF, RBPJ	0.261939
GO:0060070~Wnt receptor signaling pathway through beta-catenin	CCND1, CHD8, SOX4, UBE2B, APC	0.260674
GO:0034470~ncRNA processing	UTP23, MOCS3, TRMU, PUS3, EMG1, LCMT2, INTS2, EXOSC1, TRMT61A, URM1, TARBP2, TRMT5, CTU2, WDR4, PES1	0.26285
GO:0044265~cellular macromolecule catabolic process	PSMB10, UBE2Z, LDLR, USP3, VPRBP, TRIM11, UBE2D3, MGRN1, EIF3E, PPP2CB, PSMB2, FBXO28, FBXO6, RBCK1, HECTD3, DDA1, LSM2, USP32, ANAPC1, LRRC41, CBL, UBE2B, NAE1, URM1, PSMA1, DCUN1D1, CUL4A, KCMF1, UBA3, RNF139, PIAS2, USP22, ANAPC7, PIAS1, TNFAIP3, XRN2, RNF41, FBXO11	0.28437
GO:0016192~vesicle-mediated transport	VPS29, SEC24B, CAV1, LDLR, EXOC7, USE1, TRAPPC2L, ARHGAP17, CD24A, HOOK3, TRAPPC6A, CD47, MIA3, AP2B1, MCOLN1, TRIP10, SEC24D, EHD2, KDELR1, SNAPIN, ERGIC3, CORO1C, COG5, AP2A2, RABEP2, RAB34, FKBP15, SEC13, GOSR2, COPE, GGA3	0.280292
GO:0009057~macromolecule catabolic process	PSMB10, UBE2Z, LDLR, USP3, USE1, VPRBP, TRIM11, AKT1, UBE2D3, MGRN1, EIF3E, PPP2CB, PSMB2, FBXO28, FBXO6, RBCK1, HECTD3, DDA1, LSM2, USP32, ANAPC1, LRRC41, CBL, UBE2B, NAE1, URM1, PSMA1, DCUN1D1, CUL4A, KCMF1, UBA3, RNF139, PIAS2, USP22, ANAPC7, PIAS1, TNFAIP3, XRN2, RNF41, FBXO11	0.280721
GO:0051603~proteolysis involved in cellular protein catabolic process	PSMB10, UBE2Z, USP3, VPRBP, TRIM11, UBE2D3, MGRN1, PPP2CB, PSMB2, FBXO28, FBXO6, RBCK1, HECTD3, DDA1, USP32, ANAPC1, LRRC41, CBL, UBE2B, NAE1, URM1, PSMA1, DCUN1D1, CUL4A, KCMF1, UBA3, RNF139, PIAS2, USP22, ANAPC7, PIAS1, TNFAIP3, FBXO11, RNF41	0.310726
GO:0006888~ER to Golgi vesicle-mediated transport	SEC24B, USE1, TRAPPC2L, SEC13, SEC24D, ERGIC3	0.317157
GO:0044257~cellular protein catabolic process	PSMB10, UBE2Z, USP3, VPRBP, TRIM11, UBE2D3, MGRN1, PPP2CB, PSMB2, FBXO28, FBXO6, RBCK1, HECTD3, DDA1, USP32, ANAPC1, LRRC41, CBL, UBE2B, NAE1, URM1, PSMA1, DCUN1D1, CUL4A, KCMF1, UBA3, RNF139, PIAS2, USP22, ANAPC7, PIAS1, TNFAIP3, FBXO11, RNF41	0.322285
GO:0008033~tRNA processing	URM1, PUS3, MOCS3, TRMU, LCMT2, CTU2, TRMT5, WDR4, TRMT61A	0.3288
GO:0016310~phosphorylation	FGFR2, CDK17, BCKDK, UQCRC1, EFNA1, PRKDC, DSTYK, CHEK2, ATP5G3, PXN, AKT1, IGF1R, ILK, ATP5L, TNKS, MASTL, DYRK2, TES, CDK13, SRPK2, SCAMP3, BRAF, MET, PICK1, TRIM28, ATP6V1H, CDK9, MINK1, CDK7, CDK2, SRPK1, ATP6V1C1, DDR1, PRKD2, CCND1, MAPK6, PLK1, GSK3B, DYRK1A, NEK9, MAPK8, ATP5A1	0.36195
GO:0043632~modification-dependent macromolecule catabolic process	UBE2Z, USP3, VPRBP, TRIM11, UBE2D3, MGRN1, PPP2CB, FBXO28, FBXO6, RBCK1, HECTD3, DDA1, USP32, ANAPC1, LRRC41, CBL, UBE2B, NAE1, URM1, PSMA1, DCUN1D1, KCMF1, CUL4A, UBA3, RNF139, PIAS2, USP22, PIAS1, ANAPC7, TNFAIP3, FBXO11, RNF41	0.380564
GO:0019941~modification-dependent protein catabolic process	UBE2Z, USP3, VPRBP, TRIM11, UBE2D3, MGRN1, PPP2CB, FBXO28, FBXO6, RBCK1, HECTD3, DDA1, USP32, ANAPC1, LRRC41, CBL, UBE2B, NAE1, URM1, PSMA1, DCUN1D1, KCMF1, CUL4A, UBA3, RNF139, PIAS2, USP22, PIAS1, ANAPC7, TNFAIP3, FBXO11, RNF41	0.380564
GO:0034227~tRNA thio-modification	URM1, MOCS3, CTU2	0.455438
GO:0010212~response to ionizing radiation	EYA3, TRP53, THBD, BRE, PRKDC, CHEK2, ERCC1	0.482564
GO:0031113~regulation of microtubule polymerization	CAV1, MAPRE1, APC, TES	0.474233
GO:0016331~morphogenesis of embryonic epithelium	FGFR2, LAMA5, LMO4, TSC2, IFT172, JAG2, TGIF1, IFT52, VASP	0.464705
GO:0043066~negative regulation of apoptosis	TRP53, BMI1, PGAP2, QARS, SNAI2, UBE2B, TAX1BP1, AKT1, TRIAP1, CHD8, BTG2, GSK3B, PPP2CB, DPM1, MAPK8, ERCC1, RASA1, APC	0.47264
GO:0034660~ncRNA metabolic process	UTP23, PUS3, MOCS3, TRMU, EMG1, LCMT2, INTS2, QARS, EXOSC1, TRMT61A, URM1, TRMT5, CTU2, WDR4, YARS2, PES1	0.474073
GO:0010608~posttranscriptional regulation of gene expression	SOX4, PRKDC, IGF2BP2, ANKHD1, SAMD4, MTRR, AKT1, TARBP2, TBRG1, EIF3K, TNRC6B, TNRC6A, EIF4E2	0.482437
GO:0006399~tRNA metabolic process	URM1, PUS3, MOCS3, TRMU, LCMT2, CTU2, TRMT5, WDR4, QARS, YARS2, TRMT61A	0.473714
GO:0043069~negative regulation of programmed cell death	TRP53, BMI1, PGAP2, QARS, SNAI2, UBE2B, TAX1BP1, AKT1, TRIAP1, CHD8, BTG2, GSK3B, PPP2CB, DPM1, MAPK8, ERCC1, RASA1, APC	0.495628
GO:0045767~regulation of anti-apoptosis	RTN4, BRE, RTKN, RASA1	0.487026
GO:0007093~mitotic cell cycle checkpoint	TRP53, CCND1, PSMG2, FOXO4, APC	0.484337
GO:0060548~negative regulation of cell death	TRP53, BMI1, PGAP2, QARS, SNAI2, UBE2B, TAX1BP1, AKT1, TRIAP1, CHD8, BTG2, GSK3B, PPP2CB, DPM1, MAPK8, ERCC1, RASA1, APC	0.484154
GO:0006793~phosphorus metabolic process	FGFR2, CDK17, BCKDK, UQCRC1, EFNA1, DSTYK, PRKDC, CHEK2, ATP5G3, PXN, AKT1, MTMR2, IGF1R, PTPLB, ILK, ATP5L, TNKS, MASTL, DYRK2, TES, CDK13, SRPK2, SCAMP3, BRAF, MET, PICK1, TRIM28, ATP6V1H, CDK9, MINK1, CDK7, CDK2, SRPK1, ATP6V1C1, EYA3, DDR1, PRKD2, CCND1, MTMR14, MAPK6, PLK1, PTP4A1, GSK3B, DYRK1A, NEK9, MAPK8, ATP5A1	0.493736
GO:0006796~phosphate metabolic process	FGFR2, CDK17, BCKDK, UQCRC1, EFNA1, DSTYK, PRKDC, CHEK2, ATP5G3, PXN, AKT1, MTMR2, IGF1R, PTPLB, ILK, ATP5L, TNKS, MASTL, DYRK2, TES, CDK13, SRPK2, SCAMP3, BRAF, MET, PICK1, TRIM28, ATP6V1H, CDK9, MINK1, CDK7, CDK2, SRPK1, ATP6V1C1, EYA3, DDR1, PRKD2, CCND1, MTMR14, MAPK6, PLK1, PTP4A1, GSK3B, DYRK1A, NEK9, MAPK8, ATP5A1	0.493736
GO:0002098~tRNA wobble uridine modification	URM1, MOCS3, CTU2	0.498833
GO:0002097~tRNA wobble base modification	URM1, MOCS3, CTU2	0.498833
GO:0060429~epithelium development	FGFR2, F11R, PSAP, LMO4, JAG2, VASP, DDR1, IGF1R, LAMA5, SERPINB5, ILK, TSC2, IFT172, WDR77, TGIF1, POU3F1, IFT52, RBPJ, VEZF1	0.538551
GO:0006886~intracellular protein transport	ASPSCR1, TRP53, SNX9, SCAMP3, SEC24B, XPO5, PICK1, CD24A, AP2A2, AP2B1, TOM1L2, GSK3B, TSC2, PEX16, GOSR2, RAB10, TNPO1, SEC24D, GGA3	0.589473
GO:0006468~protein amino acid phosphorylation	FGFR2, CDK17, BCKDK, EFNA1, PRKDC, DSTYK, CHEK2, PXN, AKT1, IGF1R, ILK, TNKS, DYRK2, MASTL, TES, CDK13, SRPK2, SCAMP3, BRAF, PICK1, TRIM28, MET, CDK9, MINK1, CDK7, CDK2, SRPK1, DDR1, PRKD2, CCND1, MAPK6, PLK1, GSK3B, DYRK1A, NEK9, MAPK8	0.601484
GO:0034613~cellular protein localization	ASPSCR1, TRP53, SNX9, OXA1L, SCAMP3, SEC24B, XPO5, PICK1, CD24A, AP2A2, AP2B1, TOM1L2, GSK3B, TSC2, PEX16, GOSR2, RAB10, TNPO1, SEC24D, GGA3	0.607299
GO:0009451~RNA modification	URM1, PUS3, MOCS3, CTU2, WDR4, TRMT61A	0.617398
GO:0070727~cellular macromolecule localization	ASPSCR1, TRP53, SNX9, OXA1L, SCAMP3, SEC24B, XPO5, PICK1, CD24A, AP2A2, AP2B1, TOM1L2, GSK3B, TSC2, PEX16, GOSR2, RAB10, TNPO1, SEC24D, GGA3	0.614975
GO:0006302~double-strand break repair	EYA3, TRP53, BRE, POLA1, PRKDC, ERCC1	0.636962
GO:0055114~oxidation reduction	ACADSB, NDUFB5, CYB5R1, CYP1B1, UQCRC1, FDX1, CYP2J6, HSD17B12, NDUFAB1, GFER, ALDH1L2, FTH1, NDUFB2, MTHFD1, IDH3G, HIF1AN, IVD, VKORC1, CCS, AKR7A5, TSTA3, NDUFS2, GAPDH, NSDHL, SCD1, NDUFA8, DHRS13, MICAL2, NDUFC1, GRHPR, TECR, ALDH16A1, DHRS4, AKR1B3, OXNAD1, CRYZL1, MDH1	0.636867
GO:0001568~blood vessel development	RTN4, KLF5, GNA13, FGFR2, CAV1, GPI1, AKT1, HIF1A, EREG, HBEGF, GLMN, HS6ST1, RBPJ, VEZF1, RAPGEF1, RASA1, NSDHL	0.638585
GO:0000278~mitotic cell cycle	ANAPC1, SEPT2, POLA1, FOXO4, CCNG1, CDK2, CCND1, PLK1, SAC3D1, UBA3, NEK9, ANAPC7, MAPRE1, PES1, BUB3, APC, TXNL4A	0.638585
GO:0010941~regulation of cell death	BMI1, MCL1, JAG2, RRAGA, PRKDC, QARS, CD24A, AKT1, TRIAP1, CHD8, PPP2CB, SHISA5, DLG5, DYRK2, ERCC1, RASA1, TEX261, APC, TRP53, PGAP2, TFPT, BAD, PEA15A, SNAI2, UBE2B, TAX1BP1, HIF1A, PSMG2, BTG2, GSK3B, DPM1, MAPK8	0.640393
GO:0060562~epithelial tube morphogenesis	FGFR2, DDR1, LAMA5, LMO4, TSC2, IFT172, ILK, TGIF1, IFT52, VASP	0.647707
GO:0008283~cell proliferation	TRP53, SETDB1, GINS1, FGFR2, PPARD, MET, SRA1, POLA1, BAD, PARK7, IFNAR2, CCND1, EREG, GSK3B, RAP1B, PES1, ERCC1	0.657551
GO:0001944~vasculature development	RTN4, KLF5, GNA13, FGFR2, CAV1, GPI1, AKT1, HIF1A, EREG, HBEGF, GLMN, HS6ST1, RBPJ, VEZF1, RAPGEF1, RASA1, NSDHL	0.686331
GO:0035239~tube morphogenesis	GNA13, FGFR2, LMO4, PXN, VASP, DDR1, HIF1A, LAMA5, ILK, TSC2, IFT172, TGIF1, IFT52	0.689702
GO:0001525~angiogenesis	KLF5, RTN4, GNA13, FGFR2, HIF1A, EREG, HBEGF, HS6ST1, RBPJ, VEZF1, GPI1	0.686297
GO:0032446~protein modification by small protein conjugation	BMI1, AKT1, NOSIP, MGRN1, KCMF1, UBA3, PIAS2, RNF41	0.68136
GO:0042981~regulation of apoptosis	BMI1, MCL1, JAG2, PRKDC, QARS, CD24A, AKT1, TRIAP1, CHD8, PPP2CB, SHISA5, DLG5, DYRK2, ERCC1, RASA1, TEX261, APC, TRP53, PGAP2, TFPT, BAD, PEA15A, SNAI2, UBE2B, TAX1BP1, HIF1A, PSMG2, BTG2, GSK3B, DPM1, MAPK8	0.682282
GO:0007169~transmembrane receptor protein tyrosine kinase signaling pathway	FGFR2, NDST1, EFNA1, MET, PICK1, FOXO4, AKT1, DDR1, IGF1R, EREG, TIAM1, TSC2, HBEGF, RAPGEF1	0.684344
GO:0033077~T cell differentiation in the thymus	TRP53, JAG2, PRKDC, MINK1, APC	0.684267
GO:0002009~morphogenesis of an epithelium	FGFR2, LMO4, JAG2, VASP, IGF1R, DDR1, LAMA5, SERPINB5, ILK, TSC2, IFT172, TGIF1, IFT52	0.681906
GO:0033043~regulation of organelle organization	ARPC1A, TRP53, LIMA1, CAV1, PSMG2, EREG, HECTD3, MAPRE1, UBE2B, RASA1, APC, TES	0.682077
GO:0030330~DNA damage response, signal transduction by p53 class mediator	TRP53, TRIAP1, DYRK2, MIF	0.68657
GO:0043067~regulation of programmed cell death	BMI1, MCL1, JAG2, PRKDC, QARS, CD24A, AKT1, TRIAP1, CHD8, PPP2CB, SHISA5, DLG5, DYRK2, ERCC1, RASA1, TEX261, APC, TRP53, PGAP2, TFPT, BAD, PEA15A, SNAI2, UBE2B, TAX1BP1, HIF1A, PSMG2, BTG2, GSK3B, DPM1, MAPK8	0.701019
GO:0048589~developmental growth	GINS1, AKT1, FGFR2, SETDB1, PPARD, EREG, PSAP, MTPN, HBEGF	0.702842
GO:0006417~regulation of translation	AKT1, TARBP2, EIF3K, IGF2BP2, ANKHD1, TNRC6B, TNRC6A, SAMD4, EIF4E2	0.702842
GO:0043254~regulation of protein complex assembly	ARPC1A, CAV1, MAPRE1, CD24A, RASA1, APC, TES	0.69933
GO:0048145~regulation of fibroblast proliferation	FNTB, TRP53, EREG, TGIF1	0.714555
GO:0022618~ribonucleoprotein complex assembly	EIF6, TARBP2, SRPK2, LSM2, PTBP2	0.712395
GO:0048514~blood vessel morphogenesis	KLF5, GNA13, FGFR2, RTN4, CAV1, GPI1, HIF1A, EREG, HBEGF, GLMN, HS6ST1, RBPJ, VEZF1, RASA1	0.707386
GO:0001942~hair follicle development	AKT1, PPARD, LAMA5, RBPJ, NSDHL, APC	0.717077
GO:0022404~molting cycle process	AKT1, PPARD, LAMA5, RBPJ, NSDHL, APC	0.717077
GO:0022405~hair cycle process	AKT1, PPARD, LAMA5, RBPJ, NSDHL, APC	0.717077
GO:0007242~intracellular signaling cascade	GNA13, GNA15, CAV1, ADORA2B, NDST1, EFNA1, RAB5C, RTKN, CHEK2, FOXO4, PXN, MIF, AKT1, TRIAP1, TIAM1, RAB11B, RAB24, MT1, DYRK2, RAPGEF1, CDC42EP5, NET1, TRP53, PGAP2, SRPK2, BRAF, PICK1, MET, ADIPOR1, MINK1, PEA15A, TAX1BP3, SRPK1, PRKD2, CCND1, CNIH4, GSK3B, RAB34, TSC2, BRE, RHEB, MAPK8, GNAS, RAP1B, PIAS1, RAB10	0.735379
GO:0001841~neural tube formation	LMO4, TSC2, IFT172, TGIF1, IFT52, VASP	0.733766
GO:0048009~insulin-like growth factor receptor signaling pathway	AKT1, IGF1R, TSC2	0.730036
GO:0006281~DNA repair	TRP53, NUDT1, POLA1, PRKDC, UBE2B, EYA3, CUL4A, PRMT6, FBXO6, BRE, CRY1, ERCC4, ERCC1, XRN2, FANCB	0.727747
GO:0070647~protein modification by small protein conjugation or removal	BMI1, AKT1, NOSIP, MGRN1, KCMF1, UBA3, PIAS2, USP22, RNF41	0.724843
GO:0042303~molting cycle	AKT1, PPARD, LAMA5, RBPJ, NSDHL, APC	0.740722
GO:0042633~hair cycle	AKT1, PPARD, LAMA5, RBPJ, NSDHL, APC	0.740722
GO:0000075~cell cycle checkpoint	TRP53, CCND1, PSMG2, BRE, FOXO4, APC	0.740722
GO:0009144~purine nucleoside triphosphate metabolic process	NME4, ATP6V1C1, NUDT1, ATP1B3, ATP5L, ATP6V1H, ATP8B2, ATP5A1, ATP5G3	0.74948
GO:0018105~peptidyl-serine phosphorylation	AKT1, GSK3B, PRKDC, TNKS	0.750863
GO:0030031~cell projection assembly	KLF5, NCK2, MTSS1, LAMA5, IFT172, UBE2B, PXN	0.748481
GO:0015986~ATP synthesis coupled proton transport	ATP6V1C1, ATP5L, ATP6V1H, ATP5A1, ATP5G3	0.752471
GO:0015985~energy coupled proton transport, down electrochemical gradient	ATP6V1C1, ATP5L, ATP6V1H, ATP5A1, ATP5G3	0.752471
GO:0043009~chordate embryonic development	GNA13, FGFR2, TRP53, SETDB1, BMI1, GINS1, NDST1, LMO4, PRKDC, UBE2B, VASP, AKT1, DLX2, CHD8, HIF1A, IFT172, TSC2, TGIF1, HBEGF, HS6ST1, GNAS, IFT52, CR1L, NSDHL	0.752822
GO:0031112~positive regulation of microtubule polymerization or depolymerization	CAV1, APC, TES	0.761303
GO:0031116~positive regulation of microtubule polymerization	CAV1, APC, TES	0.761303
GO:0001838~embryonic epithelial tube formation	LMO4, TSC2, IFT172, TGIF1, IFT52, VASP	0.759213
GO:0006413~translational initiation	EIF3E, EIF3K, EIF3L, EIF1B, EIF4E2	0.765059
GO:0007034~vacuolar transport	VPS29, USE1, DSCR3, HOOK3	0.761645
GO:0009896~positive regulation of catabolic process	AKT1, BECN1, NDFIP1, APC	0.761645
GO:0009792~embryonic development ending in birth or egg hatching	GNA13, FGFR2, TRP53, SETDB1, BMI1, GINS1, NDST1, LMO4, PRKDC, UBE2B, VASP, AKT1, DLX2, CHD8, HIF1A, IFT172, TSC2, TGIF1, HBEGF, HS6ST1, GNAS, IFT52, CR1L, NSDHL	0.762572
GO:0007067~mitosis	ANAPC1, SEPT2, CCNG1, CDK2, SAC3D1, PLK1, NEK9, ANAPC7, MAPRE1, PES1, BUB3, APC, TXNL4A	0.774674
GO:0000280~nuclear division	ANAPC1, SEPT2, CCNG1, CDK2, SAC3D1, PLK1, NEK9, ANAPC7, MAPRE1, PES1, BUB3, APC, TXNL4A	0.774674
GO:0030850~prostate gland development	FGFR2, IGF1R, PSAP, SERPINB5, WDR77	0.777212
GO:0030111~regulation of Wnt receptor signaling pathway	CCND1, CHD8, SOX4, TAX1BP3, APC	0.777212
GO:0007049~cell cycle	SEPT2, POLA1, CHEK2, CCNG1, FOXO4, SAC3D1, BUB3, APC, TRP53, ANAPC1, CINP, BANP, CDK7, UBE2B, FOXN3, CDK2, NAE1, CCND1, EREG, MAPK6, PLK1, PTP4A1, GSK3B, UBA3, TBRG1, NEK9, MAPRE1, ANAPC7, USP22, PARD6G, PES1, TXNL4A	0.778616
GO:0030334~regulation of cell migration	RTN4, GNA13, LAMA3, HIF1A, LAMA5, PTP4A1, HBEGF, APC	0.775118
GO:0009260~ribonucleotide biosynthetic process	NME4, ATP6V1C1, ATP1B3, ATP5L, ATP6V1H, ATP8B2, ATP5A1, ATP5G3, PRPS2	0.771501
GO:0006119~oxidative phosphorylation	ATP6V1C1, UQCRC1, ATP5L, ATP6V1H, ATP5A1, ATP5G3	0.770006
GO:0031334~positive regulation of protein complex assembly	CAV1, CD24A, APC, TES	0.768879
GO:0042060~wound healing	FNTB, GNA13, PPARD, ANXA8, THBD, HIF1A, HPS5, MTPN, HBEGF	0.775472
GO:0009206~purine ribonucleoside triphosphate biosynthetic process	NME4, ATP6V1C1, ATP1B3, ATP5L, ATP6V1H, ATP8B2, ATP5A1, ATP5G3	0.77357
GO:0009201~ribonucleoside triphosphate biosynthetic process	NME4, ATP6V1C1, ATP1B3, ATP5L, ATP6V1H, ATP8B2, ATP5A1, ATP5G3	0.77357
GO:0048146~positive regulation of fibroblast proliferation	FNTB, EREG, TGIF1	0.770486
GO:0046716~muscle maintenance	HIF1A, DMD, APC	0.770486
GO:0019725~cellular homeostasis	TMX2, TRP53, GLRX3, CAV1, GNA15, PPARD, SLC12A2, ATOX1, TMX3, CD24A, TECR, PARK7, FTH1, CD9, SERINC5, HIF1A, DMD, MT1, POU3F1, APC	0.770536
GO:0050727~regulation of inflammatory response	CD47, ADORA2B, CD276, NDFIP1, CD24A, CR1L	0.770635
GO:0032271~regulation of protein polymerization	ARPC1A, CAV1, MAPRE1, RASA1, APC, TES	0.770635
GO:0007243~protein kinase cascade	GNA13, SRPK2, CAV1, NDST1, EFNA1, MET, PICK1, MINK1, SRPK1, PXN, AKT1, TSC2, MAPK8, PIAS1, CDC42EP5	0.774805
GO:0000087~M phase of mitotic cell cycle	ANAPC1, SEPT2, CCNG1, CDK2, SAC3D1, PLK1, NEK9, ANAPC7, MAPRE1, PES1, BUB3, APC, TXNL4A	0.772262
GO:0009145~purine nucleoside triphosphate biosynthetic process	NME4, ATP6V1C1, ATP1B3, ATP5L, ATP6V1H, ATP8B2, ATP5A1, ATP5G3	0.769356
GO:0030155~regulation of cell adhesion	DDR1, LAMA3, LAMA5, HSD17B12, JAG2, CD24A, RASA1, APC	0.769356
GO:0006984~ER-nuclear signaling pathway	TRP53, CCND1, VAPB, GSK3B	0.773354
GO:0031647~regulation of protein stability	TBRG1, PRKDC, SOX4, MTRR	0.773354
GO:0010741~negative regulation of protein kinase cascade	IGF1R, CAV1, TSC2, APC	0.773354
GO:0009165~nucleotide biosynthetic process	NME4, DCTD, MTHFD1, ATP6V1C1, ATP1B3, ATP5L, ATP6V1H, ATP8B2, CTPS2, ATP5A1, ATP5G3, PRPS2	0.770147
GO:0032268~regulation of cellular protein metabolic process	TRP53, CAV1, IGF2BP2, ANKHD1, UBE2B, CD24A, SAMD4, AKT1, TARBP2, EIF3K, RNF139, IFT52, PIAS1, TNRC6B, TNRC6A, CR1L, EIF4E2	0.767964
GO:0030098~lymphocyte differentiation	TRP53, RELB, JAG2, PRKDC, MINK1, SOX4, RBPJ, CD24A, APC	0.767644
GO:0030217~T cell differentiation	TRP53, RELB, JAG2, PRKDC, MINK1, SOX4, APC	0.765018
GO:0051052~regulation of DNA metabolic process	EYA3, TRP53, EREG, BRE, NDFIP1, UBE2B	0.762491
GO:0009142~nucleoside triphosphate biosynthetic process	NME4, ATP6V1C1, ATP1B3, ATP5L, ATP6V1H, ATP8B2, ATP5A1, ATP5G3	0.7629
GO:0009141~nucleoside triphosphate metabolic process	NME4, ATP6V1C1, NUDT1, ATP1B3, ATP5L, ATP6V1H, ATP8B2, ATP5A1, ATP5G3	0.769351
GO:0048285~organelle fission	ANAPC1, SEPT2, CCNG1, CDK2, SAC3D1, PLK1, NEK9, ANAPC7, MAPRE1, PES1, BUB3, APC, TXNL4A	0.772328
GO:0035148~tube lumen formation	LMO4, TSC2, IFT172, TGIF1, IFT52, VASP	0.770871
GO:0034220~ion transmembrane transport	ATP6V1C1, ATP5L, ATP6V1H, ATP5A1, ATP5G3	0.774678
GO:0042632~cholesterol homeostasis	CAV1, LDLR, PLSCR3, CD24A	0.772762
GO:0055092~sterol homeostasis	CAV1, LDLR, PLSCR3, CD24A	0.772762
GO:0034976~response to endoplasmic reticulum stress	TRP53, CCND1, VAPB, GSK3B	0.772762
GO:0030178~negative regulation of Wnt receptor signaling pathway	CCND1, CHD8, TAX1BP3, APC	0.772762
GO:0045070~positive regulation of viral genome replication	TARBP2, VAPB	0.772277
GO:0019048~virus-host interaction	VAPB, RRAGA	0.772277
GO:0022613~ribonucleoprotein complex biogenesis	UTP23, EIF6, TARBP2, SRPK2, EMG1, RPL7A, EXOSC1, LSM2, PTBP2, PES1	0.778824
GO:0006730~one-carbon metabolic process	MTHFD1, BTG2, LCMT2, PRMT6, ILF3, AHCYL2, ALDH1L2, TRMT61A, UBE2B	0.776289
GO:0006915~apoptosis	UBE2Z, MCL1, ZMAT3, PRKDC, RTKN, RRAGA, CD24A, AKT1, TRIAP1, SHISA5, DYRK2, TRP53, SRA1, FAM188A, BAD, PEA15A, PPP1R13L, TAX1BP1, NAE1, PDCL3, PSMG2, ZDHHC16, BNIP2, BRE, TNFAIP3	0.781355
GO:0034404~nucleobase, nucleoside and nucleotide biosynthetic process	NME4, DCTD, MTHFD1, ATP6V1C1, ATP1B3, ATP5L, ATP6V1H, ATP8B2, CTPS2, ATP5A1, ATP5G3, PRPS2	0.780043
GO:0034654~nucleobase, nucleoside, nucleotide and nucleic acid biosynthetic process	NME4, DCTD, MTHFD1, ATP6V1C1, ATP1B3, ATP5L, ATP6V1H, ATP8B2, CTPS2, ATP5A1, ATP5G3, PRPS2	0.780043
GO:0006259~DNA metabolic process	TRP53, ING5, GINS1, NUDT1, CINP, POLA1, PRKDC, UBE2B, POLD3, EYA3, GIN1, RFC3, ACD, CUL4A, TBRG1, PRMT6, BRE, FBXO6, CRY1, ERCC4, ERCC1, XRN2, FANCB	0.785802
GO:0007266~Rho protein signal transduction	GNA13, RTKN, TAX1BP3, CDC42EP5	0.784482
GO:0007032~endosome organization	VPS18, RAB5C, HOOK3	0.798414
GO:0060742~epithelial cell differentiation involved in prostate gland development	FGFR2, PSAP, WDR77	0.798414
GO:0030865~cortical cytoskeleton organization	CORO1C, LASP1, EHD2	0.798414
GO:0010165~response to X-ray	TRP53, THBD, ERCC1	0.798414
GO:0043409~negative regulation of MAPKKK cascade	IGF1R, CAV1, APC	0.798414
GO:0031110~regulation of microtubule polymerization or depolymerization	CAV1, MAPRE1, APC, TES	0.808357
GO:0007224~smoothened signaling pathway	NDST1, IFT172, IFT52, NSDHL	0.808357
GO:0042130~negative regulation of T cell proliferation	CD276, NDFIP1, GLMN, CD24A	0.808357
GO:0009205~purine ribonucleoside triphosphate metabolic process	NME4, ATP6V1C1, ATP1B3, ATP5L, ATP6V1H, ATP8B2, ATP5A1, ATP5G3	0.808233
GO:0012501~programmed cell death	UBE2Z, MCL1, ZMAT3, PRKDC, RTKN, RRAGA, CD24A, AKT1, TRIAP1, SHISA5, DYRK2, TRP53, SRA1, FAM188A, BAD, PEA15A, PPP1R13L, TAX1BP1, NAE1, PDCL3, PSMG2, ZDHHC16, BNIP2, BRE, TNFAIP3	0.812281
GO:0006754~ATP biosynthetic process	ATP6V1C1, ATP1B3, ATP5L, ATP6V1H, ATP8B2, ATP5A1, ATP5G3	0.809995
GO:0051130~positive regulation of cellular component organization	TRP53, CD47, CAV1, EREG, PLXNB1, TIAM1, CD24A, APC, TES	0.813144
GO:0009199~ribonucleoside triphosphate metabolic process	NME4, ATP6V1C1, ATP1B3, ATP5L, ATP6V1H, ATP8B2, ATP5A1, ATP5G3	0.811502
GO:0009314~response to radiation	EYA3, TRP53, THBD, BRE, PRKDC, MAPK8, CHEK2, SNAI2, ERCC4, ERCC1	0.814005
GO:0021915~neural tube development	BMI1, LMO4, TSC2, IFT172, TGIF1, IFT52, VASP	0.814914
GO:0031047~gene silencing by RNA	TARBP2, XPO5, TNRC6B, TNRC6A	0.81576
GO:0051054~positive regulation of DNA metabolic process	EYA3, EREG, BRE, UBE2B	0.81576
GO:0045732~positive regulation of protein catabolic process	AKT1, NDFIP1, APC	0.816728
GO:0060716~labyrinthine layer blood vessel development	AKT1, HS6ST1, NSDHL	0.816728
GO:0001837~epithelial to mesenchymal transition	HIF1A, TRIM28, RBPJ	0.816728
GO:0007167~enzyme linked receptor protein signaling pathway	TRP53, FGFR2, LTBP1, NDST1, EFNA1, MET, PICK1, FOXO4, AKT1, DDR1, IGF1R, EREG, TIAM1, TSC2, HBEGF, RAPGEF1	0.815364

## Sheet: Hits-Clip miR-203 Targets
GO terms
All Genes detected with Ago2 HITS-CLIP 3'UTR clusters with miR-203 seed matches (113)
GO (biological process) and SP_PIR_KEYWORDS
Term	Genes	P-value (adjusted)
GO:0048732~gland development	PLAG1, CCND1, CAV1, PSAP, MET, TRP63, FEM1B, SRC, AHR, MED1	0.00172301
Proto-oncogene	PLAG1, ARHGEF2, ETS2, MET, CBL, SRC	0.0110519
phosphoprotein	DLC1, CDK19, SEPT2, ADCY6, STRN, PI4K2B, SIDT2, LATS2, LSM14A, CUL2, PCBP1, TRP63, NECAP1, ZC3HAV1L, TTC39B, ARHGEF2, SH3PXD2A, RREB1, KRT10, HNRNPU, CCND1, BNIP2, CELF1, RNF20, NSD1, MED1, SNX18, CAV1, SLC39A10, AKAP12, POLA1, TMCC3, CLDN12, SRC, COL17A1, NAA50, MAP3K2, BCL11B, RPL4, TNPO1, APC, ZMYM4, MAP2K4, MET, CBL, P2RX4, EPHA4, GBE1, ITGA6, DCP2, ETS2, TMOD3, TMPO, SLC5A10, NFIB, SSR3	0.0151451
GO:0030850~prostate gland development	PLAG1, PSAP, TRP63, FEM1B, AHR	0.0331729
GO:0022612~gland morphogenesis	PLAG1, CAV1, TRP63, FEM1B, SRC, MED1	0.0369111
GO:0030856~regulation of epithelial cell differentiation	CCND1, CAV1, TRP63, APC	0.0597378
zinc-finger	PLAG1, ARHGEF2, EGR3, ZMYM4, RREB1, NR6A1, CBL, POLA1, SNAI2, BCL11B, ZDHHC9, OVOL1, ZC3HAV1L, NR2F2, RNF20, NSD1, PRKRIR	0.0687528
GO:0048608~reproductive structure development	PLAG1, PSAP, TRP63, FEM1B, SRC, AHR	0.101095
GO:0003006~reproductive developmental process	PLAG1, PSAP, TRP63, CELF1, FEM1B, SRC, AHR, MED1	0.101468
GO:0007595~lactation	CCND1, CAV1, MET, MED1	0.109093
GO:0030857~negative regulation of epithelial cell differentiation	CCND1, CAV1, TRP63	0.119775
GO:0001655~urogenital system development	PLAG1, PSAP, TRP63, FEM1B, AHR, APC	0.133379
mmu04912:GnRH signaling pathway	MAP3K2, ADCY6, MAP2K4, HBEGF, SRC	0.142102
zinc	PLAG1, EGR3, ARHGEF2, ZMYM4, RREB1, SLC39A10, NR6A1, CBL, POLA1, SNAI2, ZFP568, PDZD8, BCL11B, ZDHHC9, OVOL1, TRP63, ZC3HAV1L, NR2F2, RNF20, NSD1, PRKRIR	0.142861
activator	PLAG1, TBL1XR1, RREB1, TRP63, CELF1, NSD1, AHR, NFIB, MED1	0.144851
GO:0030879~mammary gland development	CCND1, CAV1, MET, SRC, MED1	0.146138
dna-binding	PLAG1, EGR3, RREB1, NR6A1, POLA1, SNAI2, AHR, HNRNPU, ETS2, PCBP1, OVOL1, TRP63, TMPO, NR2F2, PRKRIR, MED1, NFIB	0.151826
GO:0007242~intracellular signaling cascade	CAV1, ARHGEF2, MET, MAP2K4, ADCY6, RCAN1, LATS2, RND3, PDZD8, CCND1, CD81, TRP63, RALB, PHLDA3	0.157999
tyrosine-protein kinase	EPHA4, PTPN3, MAP2K4, MET, SRC	0.168454
GO:0048589~developmental growth	PLAG1, PSAP, HBEGF, MREG, MED1	0.173228
GO:0060742~epithelial cell differentiation involved in prostate gland development	PSAP, TRP63, FEM1B	0.175723
acetylation	PLAG1, TBL1XR1, CAV1, ARHGEF2, SEPT2, ZMYM4, AP1G1, MAP2K4, CBL, STRN, HNRNPU, LSM14A, CUL2, GBE1, NAA50, BCL11B, CELF1, ZC3HAV1L, RPL4, TMPO, RNF20, TNPO1, MED1	0.186274
membrane	SNX18, IMPAD1, CAV1, CLDN4, SLC39A10, AP1G1, ADCY6, DNAJB14, STRN, PI4K2B, TMCC3, MREG, SIDT2, CLDN12, ATP5G3, BC017643, TMEM147, COL17A1, ELOVL4, SEMA7A, ZDHHC9, RALB, NECAP1, NUP54, ANO6, PHLDA3, SCAMP1, SCD2, PTPN3, AVL9, MET, UBL3, EPHA4, P2RX4, RND3, ITGA6, NUS1, MLEC, CD81, HBEGF, TMPO, SLC5A10, SSR3, ASPRV1	0.190786
metal-binding	IMPAD1, NR6A1, ADCY6, POLA1, LATS2, ZFP568, MAP3K2, BCL11B, OVOL1, ZDHHC9, TRP63, ZC3HAV1L, NR2F2, PLAG1, EGR3, ARHGEF2, ZMYM4, RREB1, CBL, SNAI2, PDZD8, DCP2, RNF20, NSD1, PRKRIR	0.224592
kinase	CDK19, EPHA4, PTPN3, MAP3K2, MAP2K4, MET, AKAP12, PI4K2B, SRC, LATS2	0.242997
tyrosine-specific protein kinase	EPHA4, MET, SRC	0.251516
mmu04012:ErbB signaling pathway	MAP2K4, CBL, HBEGF, SRC	0.270404
mmu05200:Pathways in cancer	CUL2, CCND1, ITGA6, MET, CBL, RALB, APC	0.28083
m_cblPathway:CBL mediated ligand-induced downregulation of EGF receptors	MET, CBL, SRC	0.298193
GO:0043254~regulation of protein complex assembly	CAV1, TMOD3, AHR, APC	0.323991
GO:0008544~epidermis development	OVOL1, TRP63, MREG, APC, ASPRV1	0.324733
GO:0048609~reproductive process in a multicellular organism	CCND1, CAV1, MET, NR6A1, OVOL1, CELF1, SRC, MED1	0.334998
GO:0032504~multicellular organism reproduction	CCND1, CAV1, MET, NR6A1, OVOL1, CELF1, SRC, MED1	0.334998
GO:0007398~ectoderm development	OVOL1, TRP63, MREG, APC, ASPRV1	0.347544
GO:0010741~negative regulation of protein kinase cascade	CAV1, PHLDA3, APC	0.348148
GO:0007519~skeletal muscle tissue development	CAV1, MET, RCAN1, NR2F2	0.351689
GO:0060537~muscle tissue development	CAV1, MET, TRP63, RCAN1, NR2F2	0.352312
GO:0060538~skeletal muscle organ development	CAV1, MET, RCAN1, NR2F2	0.357749
phosphotransferase	EPHA4, MAP2K4, MET, SRC	0.360145
GO:0000278~mitotic cell cycle	CCND1, ARHGEF2, SEPT2, POLA1, LATS2, APC	0.360518
GO:0016477~cell migration	ITGA6, MET, HBEGF, NR2F2, SRC, APC	0.362794
GO:0022403~cell cycle phase	CCND1, ARHGEF2, SEPT2, OVOL1, POLA1, LATS2, APC	0.363205
GO:0043588~skin development	TRP63, APC, ASPRV1	0.363699
GO:0042127~regulation of cell proliferation	DLC1, CAV1, BCL11B, CD81, TRP63, HBEGF, APC, NFIB, MED1	0.36406
GO:0008283~cell proliferation	CCND1, MET, TRP63, POLA1, SRC, MED1	0.364435
mmu04510:Focal adhesion	CCND1, CAV1, ITGA6, MET, SRC	0.370453
alternative splicing	DLC1, NR6A1, AKAP12, DNAJB14, PI4K2B, TMCC3, SIDT2, TMEM147, CUL2, COL17A1, NAA50, BCL11B, TRP63, ZC3HAV1L, TNPO1, ANO6, TTC39B, APC, ARHGEF2, SH3PXD2A, ZMYM4, PSAP, RREB1, RCAN1, KRT10, P2RX4, EPHA4, ITGA6, PLEKHA8, CELF1, TMPO, RNF20, MED1, NFIB, SSR3	0.370688
GO:0044087~regulation of cellular component biogenesis	CAV1, TMOD3, AHR, APC	0.37091
GO:0008104~protein localization	SCAMP1, SNX18, CAV1, PLEKHA8, AP1G1, CD81, AKAP12, NECAP1, NUP54, TNPO1, SSR3	0.371024
GO:0031110~regulation of microtubule polymerization or depolymerization	ARHGEF2, CAV1, APC	0.37137
GO:0005886~plasma membrane	SNX18, CAV1, SEPT2, CLDN4, AP1G1, ADCY6, CLDN12, MREG, SRC, COL17A1, SEMA7A, RALB, NECAP1, NUP54, PHLDA3, APC, ARHGEF2, PTPN3, MET, CBL, UBL3, P2RX4, EPHA4, ITGA6, CD81, HBEGF	0.374095
GO:0045178~basal part of cell	COL17A1, CAV1, MET	0.376364
GO:0060443~mammary gland morphogenesis	CAV1, SRC, MED1	0.377044
GO:0000165~MAPKKK cascade	CAV1, CD81, MAP2K4, MET	0.391043
GO:0022402~cell cycle process	CCND1, ARHGEF2, SEPT2, OVOL1, POLA1, LATS2, APC	0.391261
GO:0060429~epithelium development	DLC1, PSAP, TRP63, FEM1B, SRC, MED1	0.392401
GO:0006796~phosphate metabolic process	CDK19, EPHA4, CCND1, PTPN3, MAP3K2, CD81, MAP2K4, MET, ATP5G3, SRC, LATS2	0.392419
GO:0006793~phosphorus metabolic process	CDK19, EPHA4, CCND1, PTPN3, MAP3K2, CD81, MAP2K4, MET, ATP5G3, SRC, LATS2	0.392419
GO:0051493~regulation of cytoskeleton organization	ARHGEF2, CAV1, TMOD3, APC	0.393209
GO:0006928~cell motion	EPHA4, ITGA6, MET, HBEGF, NR2F2, SRC, APC	0.393569
GO:0051172~negative regulation of nitrogen compound metabolic process	TBL1XR1, CAV1, NR6A1, OVOL1, TRP63, NR2F2, NSD1	0.393899
GO:0045785~positive regulation of cell adhesion	ITGA6, SRC, APC	0.397344
GO:0043244~regulation of protein complex disassembly	ARHGEF2, TMOD3, APC	0.397344
GO:0007517~muscle organ development	CAV1, MET, TRP63, RCAN1, NR2F2	0.397423
GO:0002009~morphogenesis of an epithelium	DLC1, TRP63, FEM1B, SRC, MED1	0.397956
GO:0045596~negative regulation of cell differentiation	CCND1, CAV1, TRP63, RCAN1, APC	0.398201
GO:0051338~regulation of transferase activity	CAV1, CD81, MET, LATS2, APC	0.3993
GO:0070507~regulation of microtubule cytoskeleton organization	ARHGEF2, CAV1, APC	0.399463
GO:0040007~growth	PLAG1, PSAP, HBEGF, MREG, MED1	0.399871
GO:0015031~protein transport	SCAMP1, SNX18, PLEKHA8, AP1G1, AKAP12, NECAP1, NUP54, TNPO1, SSR3	0.400139
GO:0001942~hair follicle development	TRP63, MREG, APC	0.400876
GO:0022405~hair cycle process	TRP63, MREG, APC	0.400876
GO:0022404~molting cycle process	TRP63, MREG, APC	0.400876
GO:0043242~negative regulation of protein complex disassembly	ARHGEF2, TMOD3, APC	0.40151
GO:0051348~negative regulation of transferase activity	CAV1, LATS2, APC	0.401887
GO:0051174~regulation of phosphorus metabolic process	CAV1, CD81, MET, RCAN1, LATS2, APC	0.402329
GO:0019220~regulation of phosphate metabolic process	CAV1, CD81, MET, RCAN1, LATS2, APC	0.402329
GO:0001763~morphogenesis of a branching structure	TRP63, FEM1B, SRC, MED1	0.402448
GO:0045184~establishment of protein localization	SCAMP1, SNX18, PLEKHA8, AP1G1, AKAP12, NECAP1, NUP54, TNPO1, SSR3	0.402506
GO:0051325~interphase	CCND1, POLA1, LATS2	0.402637
GO:0006469~negative regulation of protein kinase activity	CAV1, LATS2, APC	0.402637
GO:0033673~negative regulation of kinase activity	CAV1, LATS2, APC	0.402637
GO:0016310~phosphorylation	CDK19, EPHA4, CCND1, MAP3K2, CD81, MAP2K4, MET, ATP5G3, SRC, LATS2	0.402653
GO:0006357~regulation of transcription from RNA polymerase II promoter	BCL11B, NR6A1, OVOL1, TRP63, NR2F2, NSD1, AHR, NFIB, MED1	0.402951
GO:0048736~appendage development	IMPAD1, TRP63, NR2F2, MED1	0.403215
GO:0060173~limb development	IMPAD1, TRP63, NR2F2, MED1	0.403215
GO:0007049~cell cycle	CCND1, ARHGEF2, SEPT2, OVOL1, TRP63, POLA1, LATS2, AHR, APC	0.403302
GO:0031327~negative regulation of cellular biosynthetic process	TBL1XR1, CAV1, NR6A1, OVOL1, TRP63, NR2F2, NSD1	0.404126
GO:0006468~protein amino acid phosphorylation	CDK19, EPHA4, CCND1, MAP3K2, CD81, MAP2K4, MET, SRC, LATS2	0.404252
GO:0051329~interphase of mitotic cell cycle	CCND1, POLA1, LATS2	0.404263
GO:0042303~molting cycle	TRP63, MREG, APC	0.404456
GO:0042633~hair cycle	TRP63, MREG, APC	0.404456
GO:0051253~negative regulation of RNA metabolic process	TBL1XR1, NR6A1, OVOL1, TRP63, NR2F2, NSD1	0.404541
GO:0051301~cell division	CDK19, CCND1, ARHGEF2, SEPT2, LATS2, APC	0.40466
GO:0045859~regulation of protein kinase activity	CAV1, CD81, MET, LATS2, APC	0.404779
GO:0032886~regulation of microtubule-based process	ARHGEF2, CAV1, APC	0.405069
GO:0014706~striated muscle tissue development	CAV1, MET, RCAN1, NR2F2	0.40579
protein transport	SCAMP1, SNX18, PLEKHA8, AP1G1, NECAP1, NUP54, TNPO1	0.406174
GO:0009890~negative regulation of biosynthetic process	TBL1XR1, CAV1, NR6A1, OVOL1, TRP63, NR2F2, NSD1	0.407303
GO:0045892~negative regulation of transcription, DNA-dependent	TBL1XR1, NR6A1, OVOL1, TRP63, NR2F2, NSD1	0.407355
GO:0043549~regulation of kinase activity	CAV1, CD81, MET, LATS2, APC	0.408069
GO:0051494~negative regulation of cytoskeleton organization	ARHGEF2, TMOD3, APC	0.408184
GO:0051674~localization of cell	ITGA6, MET, HBEGF, NR2F2, SRC, APC	0.41002
GO:0048870~cell motility	ITGA6, MET, HBEGF, NR2F2, SRC, APC	0.41002
GO:0008285~negative regulation of cell proliferation	DLC1, CAV1, BCL11B, APC, NFIB	0.415356
Tight junction	ARHGEF2, CLDN4, CLDN12	0.418732
GO:0006605~protein targeting	AKAP12, NUP54, TNPO1, SSR3	0.420421
GO:0009925~basal plasma membrane	COL17A1, CAV1, MET	0.424593
GO:0032271~regulation of protein polymerization	CAV1, TMOD3, APC	0.42676
GO:0042770~DNA damage response, signal transduction	CCND1, TRP63, PHLDA3	0.42676
ATP	EPHA4, MAP2K4, MET, SRC	0.429778
cell division	CDK19, CCND1, ARHGEF2, SEPT2, LATS2	0.432045
GO:0000122~negative regulation of transcription from RNA polymerase II promoter	NR6A1, OVOL1, TRP63, NR2F2, NSD1	0.433012
GO:0007243~protein kinase cascade	CAV1, CD81, MAP2K4, MET, LATS2	0.446098
GO:0048729~tissue morphogenesis	DLC1, TRP63, FEM1B, SRC, MED1	0.44627
GO:0048545~response to steroid hormone stimulus	CAV1, RCAN1, SRC	0.448772
GO:0045444~fat cell differentiation	CCND1, ITGA6, MED1	0.450233
GO:0010639~negative regulation of organelle organization	ARHGEF2, TMOD3, APC	0.451737
GO:0033598~mammary gland epithelial cell proliferation	CCND1, MED1	0.455829
GO:0045736~negative regulation of cyclin-dependent protein kinase activity	LATS2, APC	0.455829
GO:0031112~positive regulation of microtubule polymerization or depolymerization	CAV1, APC	0.487206
GO:0031116~positive regulation of microtubule polymerization	CAV1, APC	0.487206
repressor	LSM14A, TBL1XR1, RREB1, BCL11B, SNAI2, NSD1	0.488605
GO:0033043~regulation of organelle organization	ARHGEF2, CAV1, TMOD3, APC	0.49999
GO:0010627~regulation of protein kinase cascade	CAV1, PSAP, PHLDA3, APC	0.501397
GO:0005635~nuclear envelope	BNIP2, POLA1, NUP54, TMPO, TNPO1	0.503385
GO:0007173~epidermal growth factor receptor signaling pathway	HBEGF, SRC	0.507749
GO:0016481~negative regulation of transcription	TBL1XR1, NR6A1, OVOL1, TRP63, NR2F2, NSD1	0.51013
GO:0035295~tube development	DLC1, TRP63, SRC, NFIB, MED1	0.521397
GO:0031113~regulation of microtubule polymerization	CAV1, APC	0.526152
GO:0030900~forebrain development	DLC1, NR2F2, SRC, NFIB	0.533877
GO:0043409~negative regulation of MAPKKK cascade	CAV1, APC	0.534962
GO:0060736~prostate gland growth	PLAG1, PSAP	0.534962
GO:0009725~response to hormone stimulus	CAV1, RCAN1, SRC, LATS2	0.535192
GO:0010604~positive regulation of macromolecule metabolic process	BCL11B, CD81, TRP63, NSD1, AHR, APC, NFIB, MED1	0.535477
GO:0010605~negative regulation of macromolecule metabolic process	TBL1XR1, CAV1, NR6A1, OVOL1, TRP63, NR2F2, NSD1	0.53701
GO:0006886~intracellular protein transport	AP1G1, AKAP12, NUP54, TNPO1, SSR3	0.541242
GO:0009968~negative regulation of signal transduction	CCND1, CAV1, PHLDA3, APC	0.543009
GO:0035239~tube morphogenesis	DLC1, TRP63, SRC, MED1	0.543009
GO:0045934~negative regulation of nucleobase, nucleoside, nucleotide and nucleic acid metabolic process	TBL1XR1, NR6A1, OVOL1, TRP63, NR2F2, NSD1	0.54425
tumor suppressor	PHLDA3, LATS2, APC	0.545947
GO:0031114~regulation of microtubule depolymerization	ARHGEF2, APC	0.546408
GO:0042771~DNA damage response, signal transduction by p53 class mediator resulting in induction of apoptosis	TRP63, PHLDA3	0.546408
GO:0007026~negative regulation of microtubule depolymerization	ARHGEF2, APC	0.546408
GO:0000279~M phase	ARHGEF2, SEPT2, OVOL1, LATS2, APC	0.549325
GO:0048610~reproductive cellular process	PSAP, TRP63, CELF1, FEM1B	0.54938
transferase	CDK19, MET, MAP2K4, POLA1, PI4K2B, SRC, LATS2, EPHA4, GBE1, NAA50, MAP3K2, ZDHHC9, NSD1	0.553263
GO:0006974~response to DNA damage stimulus	CCND1, TRP63, POLA1, PHLDA3, APC	0.560641
GO:0043405~regulation of MAP kinase activity	CAV1, CD81, MET	0.561907
GO:0042325~regulation of phosphorylation	CAV1, CD81, MET, LATS2, APC	0.564551
GO:0010629~negative regulation of gene expression	TBL1XR1, NR6A1, OVOL1, TRP63, NR2F2, NSD1	0.566149
GO:0031111~negative regulation of microtubule polymerization or depolymerization	ARHGEF2, APC	0.569473
GO:0060070~Wnt receptor signaling pathway through beta-catenin	CCND1, APC	0.569473
GO:0000079~regulation of cyclin-dependent protein kinase activity	LATS2, APC	0.569473
GO:0034613~cellular protein localization	AP1G1, AKAP12, NUP54, TNPO1, SSR3	0.569606
GO:0009719~response to endogenous stimulus	CAV1, RCAN1, SRC, LATS2	0.570714
GO:0051254~positive regulation of RNA metabolic process	BCL11B, TRP63, NSD1, AHR, NFIB, MED1	0.572373
GO:0010558~negative regulation of macromolecule biosynthetic process	TBL1XR1, NR6A1, OVOL1, TRP63, NR2F2, NSD1	0.572782
GO:0010648~negative regulation of cell communication	CCND1, CAV1, PHLDA3, APC	0.573265
GO:0070727~cellular macromolecule localization	AP1G1, AKAP12, NUP54, TNPO1, SSR3	0.573369
GO:0045893~positive regulation of transcription, DNA-dependent	BCL11B, TRP63, NSD1, AHR, NFIB, MED1	0.573666
GO:0000280~nuclear division	ARHGEF2, SEPT2, LATS2, APC	0.575129
GO:0007067~mitosis	ARHGEF2, SEPT2, LATS2, APC	0.575129
GO:0007169~transmembrane receptor protein tyrosine kinase signaling pathway	EPHA4, MET, HBEGF, SRC	0.580966
GO:0043408~regulation of MAPKKK cascade	CAV1, PSAP, APC	0.583642
GO:0051129~negative regulation of cellular component organization	ARHGEF2, TMOD3, APC	0.583642
GO:0012505~endomembrane system	SCAMP1, CAV1, BNIP2, POLA1, NECAP1, NUP54, TMPO, TNPO1, SSR3	0.63349
mmu04520:Adherens junction	MET, SNAI2, SRC	0.64439
mmu05210:Colorectal cancer	CCND1, MET, APC	0.659189
mmu04540:Gap junction	MAP3K2, ADCY6, SRC	0.659189
GO:0043167~ion binding	IMPAD1, SLC39A10, NR6A1, ADCY6, POLA1, LATS2, ZFP568, MAP3K2, BCL11B, OVOL1, ZDHHC9, TRP63, ZC3HAV1L, NR2F2, ANO6, PLAG1, EGR3, ARHGEF2, SCD2, ZMYM4, RREB1, CBL, SNAI2, PDZD8, GBE1, ITGA6, DCP2, SLC5A10, NSD1, PRKRIR, RNF20	0.69153
GO:0015631~tubulin binding	ARHGEF2, TMOD3, APC	0.708751
GO:0016323~basolateral plasma membrane	COL17A1, CAV1, ITGA6, MET	0.71801
GO:0043169~cation binding	IMPAD1, SLC39A10, NR6A1, ADCY6, POLA1, LATS2, ZFP568, MAP3K2, BCL11B, OVOL1, ZDHHC9, TRP63, ZC3HAV1L, NR2F2, ANO6, PLAG1, EGR3, ARHGEF2, SCD2, ZMYM4, RREB1, CBL, SNAI2, PDZD8, GBE1, ITGA6, DCP2, SLC5A10, NSD1, PRKRIR, RNF20	0.725422
GO:0035091~phosphoinositide binding	SNX18, SH3PXD2A, PHLDA3	0.728812
GO:0046872~metal ion binding	IMPAD1, SLC39A10, NR6A1, ADCY6, POLA1, LATS2, ZFP568, MAP3K2, BCL11B, OVOL1, ZDHHC9, TRP63, ZC3HAV1L, NR2F2, ANO6, PLAG1, EGR3, ARHGEF2, SCD2, ZMYM4, RREB1, CBL, SNAI2, PDZD8, ITGA6, DCP2, NSD1, PRKRIR, RNF20, SLC5A10	0.741189
GO:0003682~chromatin binding	TRP63, POLA1, NSD1, MED1	0.750822
GO:0003677~DNA binding	PLAG1, TBL1XR1, EGR3, RREB1, NR6A1, POLA1, SNAI2, AHR, ETS2, PCBP1, OVOL1, TRP63, TMPO, NR2F2, PRKRIR, MED1, NFIB	0.76859
GO:0032947~protein complex scaffold	SEPT2, AKAP12	0.780791
GO:0009898~internal side of plasma membrane	SNX18, PTPN3, AP1G1, RALB, NUP54	0.792019
GO:0004672~protein kinase activity	CDK19, EPHA4, CCND1, PTPN3, MAP3K2, MAP2K4, MET, SRC, LATS2	0.800286
GO:0005911~cell-cell junction	ARHGEF2, ITGA6, CLDN4, CLDN12	0.804948
GO:0044459~plasma membrane part	SNX18, CAV1, ARHGEF2, CLDN4, PTPN3, AP1G1, MET, CBL, CLDN12, EPHA4, P2RX4, COL17A1, ITGA6, CD81, RALB, HBEGF, NUP54, APC	0.80626
GO:0008289~lipid binding	SNX18, ARHGEF2, SH3PXD2A, PLEKHA8, PHLDA3, ATP5G3	0.813772
GO:0005923~tight junction	ARHGEF2, CLDN4, CLDN12	0.814857
GO:0070160~occluding junction	ARHGEF2, CLDN4, CLDN12	0.814857
GO:0046914~transition metal ion binding	PLAG1, EGR3, ARHGEF2, SCD2, ZMYM4, RREB1, SLC39A10, NR6A1, CBL, POLA1, SNAI2, ZFP568, PDZD8, DCP2, BCL11B, ZDHHC9, OVOL1, TRP63, ZC3HAV1L, NR2F2, RNF20, NSD1, PRKRIR	0.84956
compositionally biased region:Ser-rich	PLAG1, CDK19, SH3PXD2A, CELF1, NSD1, APC, MED1	0.850775
region of interest:Important for dimerization	SEPT2, NR2F2	0.875971
zinc finger region:C2H2-type 4	PLAG1, RREB1, BCL11B, OVOL1, SNAI2	0.876259
GO:0008017~microtubule binding	ARHGEF2, TMOD3, APC	0.883779
sequence variant	BCL11B, CBL, POLA1, AHR, APC, NFIB, MED1	0.885243
compositionally biased region:Gly/Ser-rich	MAP2K4, KRT10	0.892105
GO:0008270~zinc ion binding	PLAG1, EGR3, ARHGEF2, ZMYM4, RREB1, SLC39A10, NR6A1, CBL, POLA1, SNAI2, ZFP568, PDZD8, BCL11B, ZDHHC9, OVOL1, TRP63, ZC3HAV1L, NR2F2, RNF20, NSD1, PRKRIR	0.898454
GO:0004879~ligand-dependent nuclear receptor activity	NR6A1, NR2F2, AHR	0.899619
mutagenesis site	EPHA4, SEPT2, MAP3K2, AP1G1, MAP2K4, NR6A1, CBL, NECAP1, CELF1, PHLDA3, NSD1, ASPRV1	0.900264
zinc finger region:C2H2-type 2	PLAG1, EGR3, RREB1, BCL11B, OVOL1, SNAI2	0.909763
domain:SAM	DLC1, EPHA4, TRP63	0.939934
zinc finger region:C2H2-type 1	PLAG1, EGR3, RREB1, BCL11B, OVOL1, SNAI2	0.949002
domain:Protein kinase	CDK19, EPHA4, MAP3K2, MAP2K4, MET, SRC, LATS2	0.950901
GO:0004713~protein tyrosine kinase activity	EPHA4, PTPN3, MAP2K4, MET, SRC	0.968952
zinc finger region:C2H2-type 3	PLAG1, EGR3, RREB1, BCL11B, OVOL1, SNAI2	0.986834
IPR013761:Sterile alpha motif-type	EPHA4, ETS2, TRP63	0.988477
IPR007087:Zinc finger, C2H2-type	PLAG1, ZFP568, EGR3, RREB1, BCL11B, OVOL1, 4930402H24RIK, SNAI2	0.994538
IPR000719:Protein kinase, core	CDK19, EPHA4, MAP3K2, MAP2K4, MET, SRC, LATS2	0.996375
IPR011510:Sterile alpha motif homology 2	DLC1, EPHA4, TRP63	0.996667
IPR017441:Protein kinase, ATP binding site	CDK19, EPHA4, MAP3K2, MAP2K4, MET, SRC, LATS2	0.998977
Term	Genes	Benjamini
