# Supplementary material for: MicroRNA-203 represses selection and expansion of oncogenic Hras transformed tumor initiating cells
Source: eLife. 2015 Jul 23;4:e07004. doi: 10.7554/eLife.07004 (PMC4536367; doi:10.7554/eLife.07004)
Supplement: Figure 6—source data 2. — DOI: http://dx.doi.org/10.7554/eLife.07004.014 [file elife07004s003.xlsx]

## Sheet: Sheet1
Symbol	Epidermis miR-203 inducible microarray	Epidermis miR-203ko Microarray	HF miR-203 Inducible Microarray	Keratinocyte 3seq miR-203ko	Keratinocyte riboseq miR-203ko	Log2Fold changes displayed
Abcb6	-0.113704	0.111824	-0.229421	0.240667	0.43634
Acadsb	-0.22478	0.144243	-0.0995718	0.733063	0.0624443
Adora2b	-0.0880136	0.26179	-0.00415471	0.0823752	0.115347
Afap1l2	-0.128678	0.359267	-0.118381	0.161468	0.114213
Ahcyl2	-0.350032	0.0898069	-0.312814	0.552052	0.191964
AI837181	-0.398287	0.135126	-0.440721	0.231818	0.115929
Ajuba	-0.255304	0.348092	-0.429312	0.175171	0.0157114
Akr1b3	-0.0378812	0.00406729	-0.15233	0.237481	0.0678077
Alg10b	-0.133119	0.102152	-0.370279	0.0640467	0.146867
Alg14	-0.240553	0.0910962	-0.013471	0.123055	0.151672
Alg6	-0.289184	0.417586	-0.0703071	0.365445	0.379569
Apc	-0.289052	0.14031	-0.273432	0.135279	0.069103
Apopt1	-0.0786403	0.117245	-0.177671	0.34321	0.192407
Arl6ip6	-0.383226	0.175777	-0.288053	0.247157	0.139294
Atf2	-0.889672	0.197984	-0.777007	0.330908	0.0135189
Atp5g3	-0.498235	0.153987	-0.379097	0.0844224	0.0392782
Atp6v1c1	-0.566645	0.565	-0.572381	0.0913793	0.0119453
Avl9	-0.182838	0.219059	-0.16883	0.186696	0.217692
Baz1a	-0.124777	0.149327	-0.0442938	0.00219006	0.0341864
BC017158	-0.290089	0.204338	-0.300968	0.281837	0.0347626
Bcam	-0.296075	0.252416	-0.860756	0.172088	0.10403
Bmi1	-0.57195	0.155368	-0.560019	0.840186	0.00904183
Bnip2	-0.421104	0.141358	-0.549362	0.246156	0.0606224
Bpnt1	-1.13452	0.343123	-0.511073	0.0600174	0.130795
Bri3	-0.095043	0.392249	-0.0645454	0.41727	0.208718
Btf3l4	-0.0012481	0.0815614	-0.0337039	0.0839911	0.0201367
Bub3	-0.198783	0.130562	-0.0591496	0.268471	0.00909393
Capn1	-0.224997	0.142948	-0.0903827	0.0489016	0.106325
Capns2	-0.112024	0.167278	-0.160218	0.225813	0.170947
Cav1	-0.952176	0.0981961	-1.069	0.966791	0.281576
Cbl	-0.00827108	0.0712984	-0.521031	0.528835	0.101148
Ccnd1	-0.275394	0.143379	-0.263692	0.0774997	0.0137552
Ccng1	-0.455679	0.0456965	-0.524177	0.288062	0.023747
Cd9	-0.0206651	0.0975398	-0.0151663	0.204986	0.148428
Cdk2	-0.292556	0.0932934	-0.0411144	0.114005	0.0119805
Chchd6	-0.154469	0.0653443	-0.436787	0.246603	0.574687
Chek2	-0.283163	0.128988	-0.356627	0.396296	0.162369
Chst14	-0.632847	0.224056	-0.309422	0.341805	0.054637
Cinp	-0.00785962	0.128369	-0.106581	0.137261	0.0546524
Ciz1	-0.450648	0.168431	-0.141749	0.52408	0.0357902
Ckmt1	-0.141936	0.0474412	-0.348604	0.44946	0.0396981
Clic1	-0.218948	0.0310943	-0.560597	0.0518057	0.101504
Cnbp	-0.0574765	0.0113789	-0.0484167	0.239865	0.0223203
Cnot11	-0.189822	0.328081	-0.0663819	0.226074	0.203146
Cog5	-0.204805	0.106367	-0.127109	0.140341	0.129244
Col17a1	-0.777375	0.0495217	-0.837299	0.154772	0.114113
Col7a1	-0.481481	0.14039	-0.900809	0.394585	0.11098
Commd6	-0.0758564	0.175006	-0.0641954	0.310623	0.124724
Coro1b	-0.0963375	0.00311447	-0.0880891	0.0960797	0.0823304
Coro1c	-0.0425891	0.0224231	-0.0860897	0.0218734	0.0287851
Cox7a2l	-0.000731944	0.0794456	-0.105073	0.22087	0.0530943
Cr1l	-0.0149338	0.0942398	-0.126732	0.0119249	0.105456
Cry1	-0.0924555	0.132587	-0.166277	0.0271717	0.157677
Cryzl1	-0.273134	0.210039	-0.212774	0.494886	0.219247
Ctps2	-0.835474	0.088981	-0.691227	0.435035	0.258631
Cyb5r1	-0.0491047	0.156231	-0.353355	0.204519	0.0596196
D1Ertd622e	-1.00991	0.293604	-0.196959	0.159826	0.362374
Dctd	-0.277212	0.0266827	-0.402318	0.0217146	0.104791
Dcun1d1	-0.149257	0.220057	-0.29324	0.181043	0.191646
Dda1	-0.0453051	0.00662085	-0.097153	0.0944231	0.108663
Ddx46	-0.411986	0.0197446	-0.0462704	0.0612642	0.0148325
Dennd6a	-1.17029	0.292155	-0.972769	0.0865426	0.143853
Dhx36	-0.244174	0.215384	-0.583456	0.511202	0.222768
Dlg5	-0.405825	0.463413	-0.382023	0.373358	0.0994278
Dmd	-0.187936	0.27471	-0.321148	0.122341	0.030362
Dnm1l	-0.397258	0.0664559	-0.44475	0.0306345	0.181038
Dpm1	-0.143777	0.235012	-0.453939	0.080951	0.0250735
Dpy19l3	-0.0868757	0.0150094	-0.812665	0.136194	0.0618567
Dscr3	-0.0124646	0.25758	-0.321261	0.0178495	0.149181
Dym	-0.23715	0.275576	-0.00266455	0.271517	0.22114
Dyrk1a	-0.0240528	0.173629	-0.114143	0.0700367	0.239087
Efr3a	-0.391157	0.299381	-0.227553	0.0820379	0.00336752
Ehd2	-0.192666	1.12365	-0.489211	0.024586	0.0231849
Eif1b	-0.242311	0.0926216	-0.225641	0.190372	0.366385
Eif3e	-0.0658997	0.0268306	-0.0211428	0.163297	0.0766536
Elf2	-0.117618	0.136116	-0.32402	0.758854	0.18193
Ercc4	-0.0619589	0.0731042	-0.294328	0.101749	0.0335521
Fam118b	-0.19485	0.422633	-0.570988	0.471122	0.0421918
Fam193a	-0.642725	0.396488	-0.00136442	0.147521	0.237034
Fancb	-0.0779064	0.121693	-0.2305	0.960014	0.170953
Fat1	-0.0950815	0.236733	-0.405125	0.0489182	0.131411
Fbxo11	-0.0665553	0.0894741	-0.109088	0.175531	0.124996
Foxk2	-0.46122	0.470227	-0.576496	0.141893	0.0734999
Fscn1	-0.192716	0.15862	-0.474069	0.426824	0.0536343
Fth1	-0.138651	0.15567	-0.0175638	0.107016	0.00128
Fubp1	-0.352823	0.0739959	-0.129024	0.280698	0.0630957
Fxyd3	-0.0650647	0.0229192	-0.0117389	0.0702884	0.0133211
Gbe1	-0.6507	0.459027	-1.26141	0.694461	0.0814522
Gins1	-0.622098	0.132938	-0.239105	0.0292201	0.0671035
Gjb4	-0.0597043	0.0176948	-0.00483383	0.0664259	0.0386731
Glrx3	-0.044271	0.0268477	-0.155751	0.0731961	0.00611339
Gna13	-0.237307	0.0134681	-0.102587	0.4951	0.060931
Golph3	-0.412183	0.33956	-0.279839	0.372924	0.0992687
Gosr2	-0.169236	0.03788	-0.18096	0.334937	0.0544203
Gpr180	-0.698123	0.388726	-0.636395	0.0462765	0.365318
Grhl2	-0.0169654	0.118624	-0.146534	0.327299	0.0870989
Grhpr	-0.12703	0.129228	-0.365061	0.00940574	0.0809681
Gsk3b	-0.0392924	0.0531519	-0.042274	0.0332643	0.123386
Gusb	-0.180471	0.0351975	-0.409023	0.0842045	0.220594
Hbegf	-0.0874104	0.674719	-0.078313	0.279386	0.462704
Hif1a	-0.459417	0.0771436	-0.284757	0.285633	0.0139645
Hif1an	-0.111469	0.0648121	-0.311545	0.177254	0.0907557
Higd1a	-0.254422	0.151736	-0.0503743	0.501023	0.0157635
Higd2a	-0.185038	0.215814	-0.203029	0.109747	0.12868
Hint2	-0.178762	0.209963	-0.110255	0.336541	0.100486
Hscb	-0.2535	0.19598	-0.174655	0.157153	0.0817251
Hsd17b12	-0.0858424	0.0549146	-0.00990083	0.0561558	0.054459
Igf2bp2	-0.1597	0.364129	-0.40403	0.103707	0.184164
Ikzf5	-0.0986133	0.0275794	-0.152608	0.627035	0.102437
Itgb6	-0.572465	0.397668	-0.914564	0.199137	0.077526
Itpk1	-0.0119978	0.149799	-0.0954673	0.151022	0.0859637
Jag2	-0.0675213	0.135815	-0.0472286	0.0706537	0.204236
Klhl22	-0.0593809	0.196566	-0.378688	0.534668	0.211413
Krtcap2	-0.104255	0.201772	-0.226612	0.156401	0.0973428
Lama3	-0.548129	0.121889	-0.342173	0.228005	0.0734574
Laptm4a	-0.111424	0.170659	-0.171055	0.0178222	0.137297
Lasp1	-1.12689	0.28087	-1.3055	0.334766	0.221967
Lgals8	-0.205269	0.25115	-0.369763	0.156092	0.164323
Lima1	-0.0455454	0.0226887	-0.368896	0.202678	0.0537192
Lmo1	-0.283492	0.223414	-0.271445	0.255283	0.876023
Lnx2	-0.418909	0.447946	-0.28661	0.751031	0.247329
Lpp	-0.428003	0.00728887	-0.547308	0.370939	0.121978
Lsm2	-0.0471132	0.0640593	-0.0874375	0.0543005	0.0503636
Ltbp1	-0.211186	0.218571	-0.103696	0.0591843	0.198082
Lxn	-0.31526	0.0678772	-0.505261	0.103137	0.0896397
Maged1	-0.291078	0.0768189	-0.114623	0.0338494	0.0723678
Mapk6	-0.0801205	0.123923	-0.112883	0.101566	0.00535078
Mapk8	-0.218231	0.0218031	-0.0185143	0.15685	0.103466
Mb21d2	-0.356745	0.028037	-0.00563801	0.151426	0.191967
Mcoln1	-0.217378	0.0146481	-0.559814	0.319999	0.227791
Mdh1	-0.133051	0.0643703	-0.021194	0.0407056	0.0549671
Med15	-0.266975	0.14775	-0.218847	0.137528	0.112339
Met	-0.235311	0.306998	-0.392625	0.149579	0.159689
Mex3c	-0.69644	0.0367353	-0.143872	0.554639	0.102911
Mfap3	-0.12397	0.0842128	-0.0234674	0.195019	0.0477527
Mmachc	-0.0365829	0.177782	-0.375275	0.372292	0.0834116
Mmadhc	-0.0300393	0.0213845	-0.0835563	0.205805	0.0760767
Mob1a	-0.0441093	0.0196414	-0.0813469	0.344646	0.0780339
Mrps22	-0.241694	0.0830691	-0.268659	0.394267	0.0421035
Mthfd1	-0.40419	0.0414768	-0.372842	0.78052	0.0132259
Mtmr2	-0.0542175	0.0353862	-0.107099	0.0221159	0.0223336
Mtpn	-0.0479834	0.00175359	-0.144338	0.0203861	0.0747907
Mtrr	-0.302926	0.254773	-0.112377	0.264774	0.0992042
Mtss1	-0.0853187	0.0236781	-0.0654409	0.273174	0.420744
Myo19	-0.0741908	0.250572	-0.0855195	0.456552	0.268146
Mzt1	-0.284957	0.23567	-0.137893	0.143337	0.0294087
Naa50	-0.989484	0.184012	-0.528911	0.22272	0.03
Naa60	-0.0880616	0.123735	-0.0697282	0.130779	0.140538
Nae1	-0.0170836	0.090267	-0.166491	0.422901	0.0353497
Ndufa8	-0.209425	0.0287446	-0.126057	0.115823	0.0921596
Ndufab1	-0.0632109	0.0424299	-0.0288484	0.430933	0.0230938
Ndufb2	-0.669899	0.289226	-0.909118	0.23888	0.195839
Ndufc1	-0.10795	0.0598789	-0.0927842	0.056479	0.0629757
Net1	-0.129733	0.224846	-0.0904333	0.0455029	0.116317
Nfu1	-0.220055	0.0329	-0.0359354	0.104987	0.0577193
Nit2	-0.489879	0.07706	-0.351999	0.0691269	0.0580034
Nln	-0.09869	0.0560302	-0.03724	0.206998	0.0948252
Nme4	-0.244547	0.296334	-0.0156559	0.102759	0.0459145
Nradd	-0.0722944	0.0618723	-0.202997	0.829684	0.267314
Nsdhl	-0.465064	0.309082	-0.446933	0.011101	0.178379
Nudt1	-0.153799	0.0640346	-0.543096	0.16257	0.0122913
Nudt21	-0.119359	0.0395077	-0.00617411	0.198974	0.156698
Nufip2	-0.336743	0.164853	-0.51473	0.0499469	0.0235355
Nxt2	-0.192697	0.0660445	-0.406529	0.116362	0.156881
Oat	-0.100119	0.0189763	-0.249068	0.0094702	0.0562778
Oaz1	-0.147738	0.0368287	-0.0167032	0.138009	0.010343
Orc4	-0.485397	0.246634	-0.0671323	0.357457	0.0464128
Pafah1b2	-0.331983	0.160068	-0.114403	0.0233128	0.0300178
Pagr1a	-0.119402	0.110839	-0.187581	0.0198017	0.0792569
Park7	-0.111703	0.101864	-0.0611638	0.121738	0.0148969
Pcbd2	-0.162403	0.115957	-0.118338	0.0345029	0.227227
Pcbp2	-0.403051	0.0757858	-0.174615	0.0754352	0.138995
Pcsk6	-0.188256	0.0585785	-0.18376	0.0481877	0.297397
Pdcl3	-0.260325	0.111106	-0.394861	0.452098	0.0976894
Pgam5	-0.391034	0.470957	-0.792462	0.222551	0.305381
Phc3	-0.182418	0.129488	-0.194756	0.195166	0.36123
Pias2	-0.269749	0.275347	-0.126569	0.194833	0.0353899
Pinx1	-0.727145	0.246711	-0.300648	0.222702	0.169578
Plscr3	-0.026266	0.030223	-0.0809384	0.0152264	0.0991665
Pola1	-1.41935	0.35507	-1.82928	0.57525	0.178598
Pold3	-0.407633	0.463048	-0.506996	0.0676991	0.0136769
Pon2	-0.26324	0.220696	-0.447505	0.269803	0.029941
Ppap2c	-0.41607	0.325998	-0.381325	0.252723	0.374985
Ppp2cb	-0.140419	0.107134	-0.11792	0.133751	0.119928
Prkcdbp	-0.0780543	0.0730847	-0.311497	0.17279	0.249662
Prmt6	-0.535328	0.576874	-0.19275	0.599696	0.149923
Prps2	-0.458973	0.0141486	-1.31706	0.325186	0.115078
Psma1	-0.0599878	0.00766799	-0.0532164	0.138052	0.046662
Psmf1	-0.439766	0.0248841	-0.352206	0.057564	0.124222
Psmg2	-0.175503	0.01416	-0.0632515	0.713064	0.10973
Ptp4a1	-0.596957	0.0381586	-0.549618	0.279269	0.064777
Pttg1ip	-0.217109	0.180622	-0.621328	0.0293115	0.0623086
Pus3	-0.324844	0.171985	-0.0336888	0.0220318	0.289581
Pwp1	-0.562523	0.0557526	-0.448947	0.189087	0.0437259
Pxn	-0.435184	0.160065	-0.803415	0.145101	0.260409
Rab24	-0.12933	0.0869959	-0.0711583	0.0544218	0.136451
Rab34	-0.280233	0.339277	-0.248945	0.0684376	0.134387
Rap1b	-0.427455	0.431786	-0.548921	0.441397	0.311007
Rapgef1	-0.293707	0.491823	-1.28957	0.86661	0.601313
Rasa1	-0.024251	0.045408	-0.0456977	0.402944	0.125428
Rbm26	-0.151618	0.43669	-0.390099	0.452932	0.1607
Rbmxl1	-0.268805	0.227598	-0.257552	0.0181141	0.00594045
Rbpj	-0.0312067	0.0564442	-0.419415	0.120484	0.164868
Rchy1	-0.0703476	0.156951	-0.0269402	0.00548233	0.170601
Rcn1	-0.00701174	0.0336916	-0.00617684	0.178241	0.0179083
Rfc3	-0.40215	0.286759	-0.35913	0.0549276	0.027151
Rnf38	-0.0985576	0.0207135	-0.0467636	0.0277936	0.41708
Rpap2	-0.0435567	0.0663567	-0.101896	0.058727	0.0838111
Scrn3	-0.487485	0.162611	-0.50386	0.447166	0.076458
Sec13	-0.13835	0.0185021	-0.0786246	0.643272	0.0726669
Sec24d	-0.66047	0.468547	-0.808784	0.20632	0.043179
Sec61b	-0.142368	0.0694384	-0.167642	0.302246	0.144964
Sept2	-0.708339	0.233094	-0.730678	0.290864	0.00453619
Serhl	-0.128523	0.102948	-0.250412	0.269291	0.16846
Sf3b5	-0.147922	0.0249304	-0.107956	0.108755	0.0716997
Sh3bgrl	-0.828084	0.422511	-1.66541	0.914388	0.572629
Sh3pxd2b	-0.990834	0.306127	-0.42756	0.589342	0.11552
Sidt2	-0.0572872	0.239987	-0.105831	0.0136792	0.185692
Slc12a2	-0.337267	0.204036	-0.12192	0.141669	0.17005
Slc12a4	-0.636641	0.375033	-0.658588	0.334174	0.130299
Slc29a3	-0.0581193	0.0185172	-0.0261578	0.0657667	0.164025
Slc2a1	-0.254486	0.0492549	-0.116734	0.323883	0.0997678
Slc38a2	-0.0559047	0.051884	-0.0660508	0.0728841	0.109333
Slc39a10	-0.30178	0.244843	-0.566006	0.187908	0.0975977
Slc7a6	-0.199751	0.0744413	-0.260452	0.160286	0.117828
Smim8	-0.159488	0.144246	-0.192891	0.0998173	0.0848353
Smpd4	-0.286369	0.10297	-0.132455	0.125024	0.0765658
Smtnl2	-0.185797	0.199865	-0.574921	0.61785	0.273084
Snai2	-0.0147564	0.115287	-0.609055	0.360101	0.315017
Snapc3	-0.584601	0.369661	-0.244233	0.251689	0.0472635
Snrpb2	-0.182541	0.0478858	-0.123841	0.270074	0.0983785
Snrpc	-0.0865745	0.113784	-0.204711	0.0321587	0.0388493
Snrpg	-0.399449	0.171684	-0.166611	0.0817935	0.0553823
Snx18	-0.426066	0.103095	-0.425169	0.112973	0.0761885
Snx9	-0.0148047	0.177329	-0.121741	0.0335529	0.0491858
Specc1	-0.163173	0.316732	-0.0882748	0.0540579	0.0424647
Sra1	-0.457813	0.202761	-0.279542	0.0564458	0.0969245
Srbd1	-0.02173	0.0798716	-0.147411	0.305728	0.128237
Srpk1	-0.190152	0.00915042	-2.74745e-05	0.15111	0.0778123
Srpk2	-0.00309734	0.0030385	-0.426205	0.160559	0.115889
Srprb	-0.167547	0.161864	-0.239033	0.0451875	0.0443695
Srsf5	-0.0469673	0.0564749	-0.181414	0.0352114	0.06601
Ssbp2	-0.0805466	0.185194	-0.156381	0.14738	0.427784
Ssbp3	-0.460141	0.217669	-0.25253	0.0994635	0.112803
Surf4	-0.111861	0.179822	-0.214367	0.0813236	0.0612762
Swi5	-0.070227	0.0852914	-0.804679	0.146683	0.137593
Tada1	-0.468149	0.0808772	-0.103397	0.532813	0.201462
Taf1d	-0.142298	0.0808256	-0.237997	0.0571969	0.00744947
Tax1bp3	-0.565661	0.265166	-0.785493	0.382117	0.233091
Tbc1d1	-0.62866	0.226879	-0.278612	0.0891643	0.0293299
Tbc1d8b	-0.323427	0.046903	-0.335199	0.765282	0.0532167
Tcof1	-0.535991	0.205036	-0.366398	0.380982	0.0427545
Tes	-0.307324	0.231863	-0.124875	0.411673	0.0557852
Tex261	-0.00527145	0.0322447	-0.283624	0.0265003	0.350987
Tiprl	-0.505173	0.275972	-0.602538	0.00648712	0.0782885
Tmem126a	-0.0384005	0.0314651	-0.209582	0.0482975	0.166746
Tmem18	-0.0972027	0.0758335	-0.162977	0.571037	0.31036
Tmem242	-0.0988846	0.293098	-0.326002	0.0170584	0.10944
Tmx2	-0.184818	0.011172	-0.0375566	0.303621	0.099427
Tnks	-0.24467	0.214183	-0.256732	0.217722	0.00376552
Tnpo1	-0.51286	0.0808542	-0.585573	0.0424079	0.000277152
Tnrc6a	-0.177138	0.204954	-0.034025	0.271453	0.00574994
Tpp2	-0.14888	0.0285415	-0.208342	0.127222	0.107145
Tprkb	-0.242048	0.416076	-0.417809	0.744534	0.154481
Trappc6a	-0.308698	0.120366	-0.0245397	0.305909	0.13635
Trim26	-0.237085	0.10828	-0.283108	0.392271	0.103744
Trim27	-0.452339	0.481765	-0.862909	0.264325	0.0686814
Trim28	-0.301814	0.126247	-0.110999	0.0249681	0.0311602
Tsc2	-0.149708	0.0602467	-0.00550816	0.111796	0.0600876
Tsn	-0.0303815	0.182406	-0.209259	0.0667545	0.0358738
Tspan3	-0.280123	0.0305633	-0.253355	0.217789	0.160384
Tubgcp3	-0.722023	0.118854	-0.498081	0.414195	0.0838712
Uba3	-0.177125	0.0946516	-0.211868	0.162133	0.0553103
Ube2d2a	-0.24945	0.0844752	-0.276121	0.0805047	0.0950896
Usp32	-0.137191	0.054896	-0.0578623	0.0699833	0.337995
Vapb	-0.210177	0.326952	-0.721003	0.0995955	0.128102
Vasp	-0.380117	0.232245	-0.515569	0.167653	0.100768
Vopp1	-0.741416	0.509117	-1.33583	0.376537	0.366592
Vprbp	-0.133128	0.0248851	-0.0751385	0.00665582	0.102784
Vps29	-0.190684	0.219417	-0.35416	0.193141	0.110837
Wdr77	-0.388631	0.293347	-0.659398	0.177541	0.149322
Xpnpep3	-0.253191	0.436198	-0.500886	0.094327	0.0703619
Xrn2	-0.349869	0.303593	-1.30945	1.0516	0.0172294
Yars2	-0.606358	0.479005	-0.604505	0.321433	0.110615
Yeats2	-0.0417176	0.153894	-0.332419	0.523369	0.113539
Ythdf3	-0.727032	0.133811	-0.621685	0.0470628	0.196605
Zc3h7b	-0.00395087	0.235072	-0.218672	0.161015	0.0432243
Zcchc17	-0.0538816	0.123435	-0.279935	0.0728753	0.300376
Zdhhc16	-0.337539	0.229587	-0.623938	0.249989	0.0553918
Zfand3	-0.0982913	0.0255066	-0.0811156	0.117309	0.273722
Zfp281	-0.374765	0.157616	-0.424843	0.074393	0.192165
Zfp503	-0.235354	0.0934718	-0.0673629	0.32557	0.102923
Zfp532	-0.295319	0.155554	-0.0456863	0.259335	0.0919284
Zmym4	-0.48976	0.0448838	-0.654783	0.198763	0.0490107
