# Supplementary material for: MicroRNA-203 represses selection and expansion of oncogenic Hras transformed tumor initiating cells
Source: eLife journal article supplement (doi:10.7554/elife.07004), 2015-07-23
Supplement: supp [file elife-07004-supp-v1.zip]

Figure-6 Figure Supplement-3

A

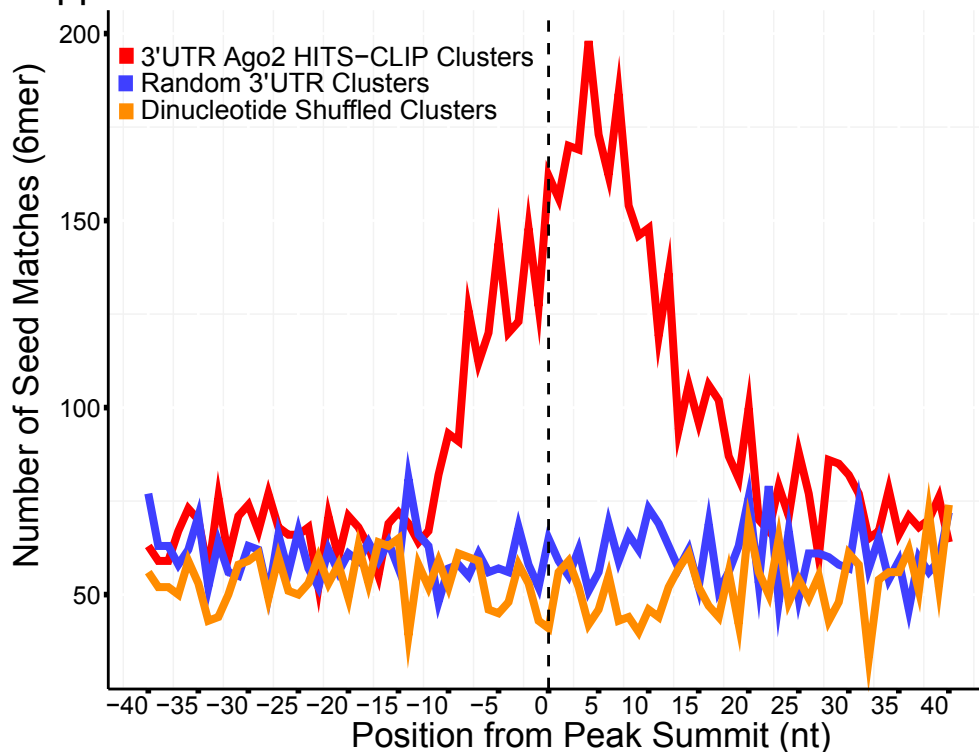

B

| miRNA           | P-value              | Motif                   | miRNA          | P-value             | Motif                              |
|-----------------|----------------------|-------------------------|----------------|---------------------|------------------------------------|
| <i>miR-27</i>   | $1 \times 10^{-117}$ | ACUGUGAA                | <i>miR-96</i>  | $1 \times 10^{-35}$ | GUGCCAAG                           |
| <i>miR-106b</i> | $1 \times 10^{-100}$ | GCACUUUA                | <i>miR-16</i>  | $1 \times 10^{-34}$ | UGCUGCUA                           |
| <i>miR-92a</i>  | $1 \times 10^{-89}$  | GUGCAAUA                | <i>miR-26b</i> | $1 \times 10^{-29}$ | UACUUGAA                           |
| <i>miR-19a</i>  | $1 \times 10^{-86}$  | UUUGCACA                | None           | $1 \times 10^{-29}$ | UGUA <del>GA</del> UA              |
| <i>miR-30a</i>  | $1 \times 10^{-79}$  | UGUUUACG                | <i>miR-125</i> | $1 \times 10^{-24}$ | UUCUCAGG                           |
| <i>let-7</i>    | $1 \times 10^{-79}$  | CUACCUCA                | <i>miR-21</i>  | $1 \times 10^{-24}$ | AUAA <del>GA</del> CU <del>G</del> |
| <i>miR-200b</i> | $1 \times 10^{-64}$  | CAGUAUUA                | <i>miR-203</i> | $1 \times 10^{-19}$ | ACAUUUCA                           |
| <i>miR-205</i>  | $1 \times 10^{-37}$  | CAAU <del>GA</del> AAAG | None           | $1 \times 10^{-16}$ | GAGGGGGC                           |
