# Supplementary material for: MicroRNA-203 represses selection and expansion of oncogenic Hras transformed tumor initiating cells
Source: eLife journal article supplement (doi:10.7554/elife.07004), 2015-07-23
Supplement: supp [file elife-07004-supp-v1.zip]

Figure-4 Figure Supplement-1

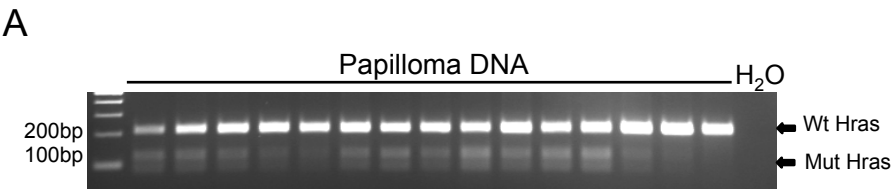

B

|                        | Number of Tumors with <i>Hras</i> <sup>Q61L</sup> mutations | Percentage of tumors with <i>Hras</i> <sup>Q61L</sup> mutations |
|------------------------|-------------------------------------------------------------|-----------------------------------------------------------------|
| miR-203 <sup>+/+</sup> | 4/5                                                         | 80%                                                             |
| miR-203 <sup>-/-</sup> | 12/14                                                       | 85.7%                                                           |
