# Supplementary material for: MicroRNA-203 represses selection and expansion of oncogenic Hras transformed tumor initiating cells
Source: eLife journal article supplement (doi:10.7554/elife.07004), 2015-07-23
Supplement: supp [file elife-07004-supp-v1.zip]

Figure - 7 Figure Supplement - 1

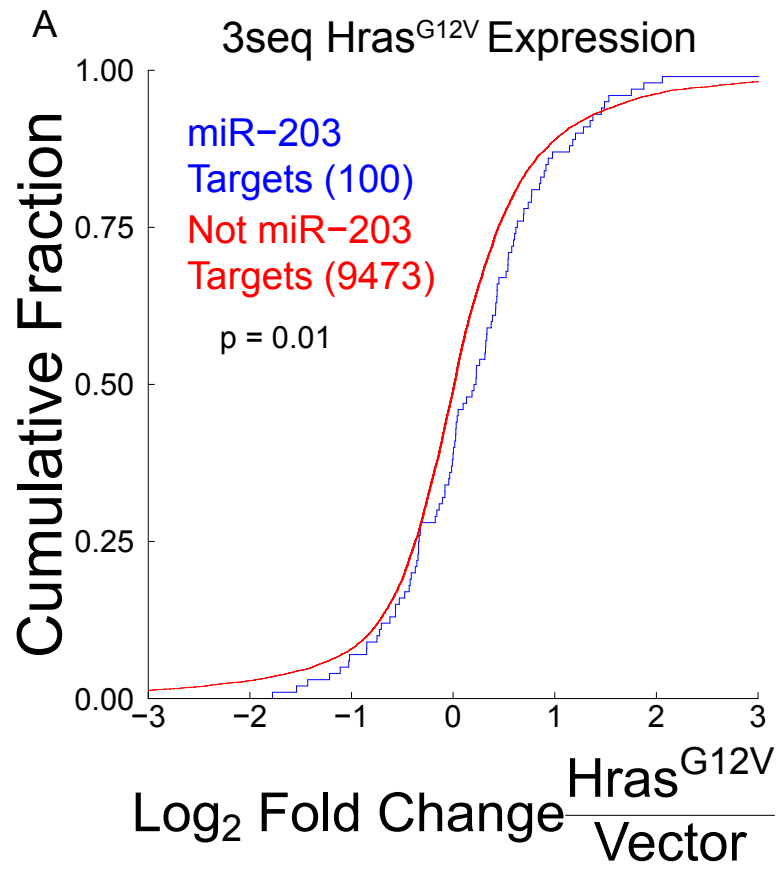

**B**

miR-203 candidate targets with miR-203  
7 or 8mer seed match, upregulated by Hras<sup>G12V</sup>

| Symbol          | log2 Fold Change | FDR      |
|-----------------|------------------|----------|
| <i>Hbegf</i>    | 3.16             | 8.38E-24 |
| <i>Ccnd1</i>    | 2.06             | 1.06E-17 |
| <i>Lama3</i>    | 1.88             | 1.16E-12 |
| <i>Slc12a2</i>  | 1.75             | 1.00E-10 |
| <i>Bmi1</i>     | 1.53             | 0.033743 |
| <i>Sh3bgrl</i>  | 1.49             | 0.023586 |
| <i>Lasp1</i>    | 1.46             | 4.63E-11 |
| <i>Dmd</i>      | 1.38             | 0.229329 |
| <i>Atf2</i>     | 1.35             | 0.010679 |
| <i>Pxn</i>      | 1.28             | 1.68E-07 |
| <i>Tspan3</i>   | 1.20             | 4.26E-06 |
| <i>Met</i>      | 1.18             | 2.40E-05 |
| <i>Rbpj</i>     | 1.14             | 0.021556 |
| <i>Avl9</i>     | 0.98             | 0.093494 |
| <i>Clic1</i>    | 0.94             | 0.000301 |
| <i>Tes</i>      | 0.91             | 0.084482 |
| <i>Pola1</i>    | 0.90             | 0.526791 |
| <i>Grhl2</i>    | 0.86             | 0.123675 |
| <i>Xrn2</i>     | 0.85             | 0.609704 |
| <i>Ln timer</i> | 0.77             | 0.719248 |
