# Supplementary material for: MicroRNA-203 represses selection and expansion of oncogenic Hras transformed tumor initiating cells
Source: eLife. 2015 Jul 23;4:e07004. doi: 10.7554/eLife.07004 (PMC4536367; doi:10.7554/eLife.07004)
Supplement: Supplementary file 2. — Primers, antibodies, and shRNAs used in this study. DOI: http://dx.doi.org/10.7554/eLife.07004.024 [file elife07004s005.xlsx]

## Sheet: primers
Oligo name	Sequence	Usage
P7T20V	CTTGGCACCCGAGAATTCCATTTTTTTTTTTTTTTTTTTTV	3Seq Reverse Transcription
5'Adaptor	GTTCAGAGTTCTACAGTCCGACGAT	3Seq Adaptor Ligation
5'AdaptorRV	(P)TCGTCGGACTGTAGAACTCTGAAC	3Seq Adaptor Ligation
RP1	AATGATACGGCGACCACCGAGATCTACACGTTCAGAGTTCTACAGTCCGA	3Seq and small Rna-Seq library PCR
RT Primer	GCCTTGGCACCCGAGAATTCCA	small RNA-Seq Reverse Transcription and library PCR
5' adaptor miR-seq	GUUCAGAGUUCUACAGUCCGACGAUCNN	small RNA-Seq linker ligation (Note RNA)
3' Adaptor miR-seq	NNTGGAATTCTCGGGTGCCAAGG	small RNA-Seq linker ligation (5' preadenylated)
miR-203priF	CTCCGGGCTGTGCAGAACT	qPCR
miR-203priR	CGGGTCTAGTGGTCCTAAACATT	qPCR
K10F	GGAGGGTAAAATCAAGGAGTGGTA	qPCR
K10R	TCAATCTGCAGCAGCACGTT	qPCR
Pola1F	GTA CAC CCA GCT GTG CTT TTA CCG	qPCR
PolaR	AAC TGC TCT GCT ATG TTC TTG ACT T	qPCR
HbegfF	CGGGGAGTGCAGATACCTG	qPCR
HbegfR	TTCTCCACTGGTAGAGTCAGC	qPCR
Pola1_3'UTR_F	atattctagAAGTCCTGAGAGAGCCGGGAAG	3'UTR cloning
Pola1_3'UTR_R	atatctcgAGATAAGTATTTAAGGCTGCCATATT	3'UTR cloning
Hbegf_3'UTR_F	atattctagaGGCTACTTCTGAGACAGTGGTTCG	3'UTR cloning
Hbegf_3'UTR_R	atatagaattcTTGTAACAGTTCAGACATGGCACT	3'UTR cloning
Pola1mut33	CTAGtaaagtTCAGTTCTTCAGAATAGTGTC	3'UTR cloning Mutations
Pola1mut35	GAAGAACTGAactttaCTAGCAAGCACTGGATCCTGTCA	3'UTR cloning Mutations
Pola1mut23	CTTTGTCCTttgtaaagtCAAAATTTATGGTGAGGTTGTAGTAAG	3'UTR cloning Mutations
Pola1mut25	actttacaaAGGACAAAGTATTTAAAATGTGC	3'UTR cloning Mutations
Pola1mut13	taaagtGTGCTGTCTTTCATATAAGTGGTG	3'UTR cloning Mutations
Pola1mut15	TGAAAGACAGCACactttaCAGCCATGCTTGTAGCCAGTAGC	3'UTR cloning Mutations
Hbegfmut15	GTCTAGGCACTactttaATTATTGTTAGATTGTTAA	3'UTR cloning Mutations
Hbegfmut13	TAATtaaagtAGTGCCTAGACTGTTACTTTGGC	3'UTR cloning Mutations
Hbegfmut25	TCTTCactttacaAGACAGACAATAAATTACTACCG	3'UTR cloning Mutations
Hbegfmut23	TGTCTtgtaaagtGAAGATGTCCCTGGAGCAGA	3'UTR cloning Mutations

## Sheet: antibodies
Primary Antibody	Usage	Dilutions	Cat. Number	Company
K5	IF	1:2000	Sig-3475	Covance
Brdu	IF	1:100	ab6326	Abcam
K1	IF	1:200	n/a	Gift From E. Fuchs
Loricrin	IF	1:200	n/a	Gift From E. Fuchs
p63	IF	1:100	4892	Cell Signaling
Ki67	IF	1:100	ab15580	Abcam
Pola1	WB	1:1000 in 5% BSA	A302-851A	Bethyl
B-tubulin	WB	1:5000 in 5% BSA	2146	Cell Signaling
Ccnd1	WB	1:1000 in 5% BSA	2978	Cell Signaling
Ago2	CLIP	3ug /ml of lysate	Clone 2D4	Wako

## Sheet: shRNA
Name	shRNA number	sequence	Targeted region
Hbegf shRNA 1	TRCN0000335387	CCGGCCCATGCCTCAGGAAATACAACTCGAGTTGTATTTCCTGAGGCATGGGTTTTTG	CDS
Hbegf shRNA 2	TRCN0000089220	CCGGGAGGAGGTTATGACTTGGAAACTCGAGTTTCCAAGTCATAACCTCCTCTTTTTG	CDS
Hbegf shRNA 3	TRCN0000089221	CCGGCCCATGCCTCAGGAAATACAACTCGAGTTGTATTTCCTGAGGCATGGGTTTTTG	CDS
Pola1 shRNA 1	TRCN0000071229	CCGGGCCAATCAGTTGGTGTAAATTCTCGAGAATTTACACCAACTGATTGGCTTTTTG	CDS
Pola1 shRNA 2	TRCN0000071230	CCGGCCAGTTTGTATCGTTGCAGTACTCGAGTACTGCAACGATACAAACTGGTTTTTG	CDS
Pola1 shRNA 3	TRCN0000071231	CCGGCGTCAGGATGATGACTGGATTCTCGAGAATCCAGTCATCATCCTGACGTTTTTG	CDS
