# Supplementary figures and images for: MicroRNA-203 represses selection and expansion of oncogenic Hras transformed tumor initiating cells
Source: eLife journal article supplement (doi:10.7554/elife.07004), 2015-07-23

Figure-6 Figure Supplement-1

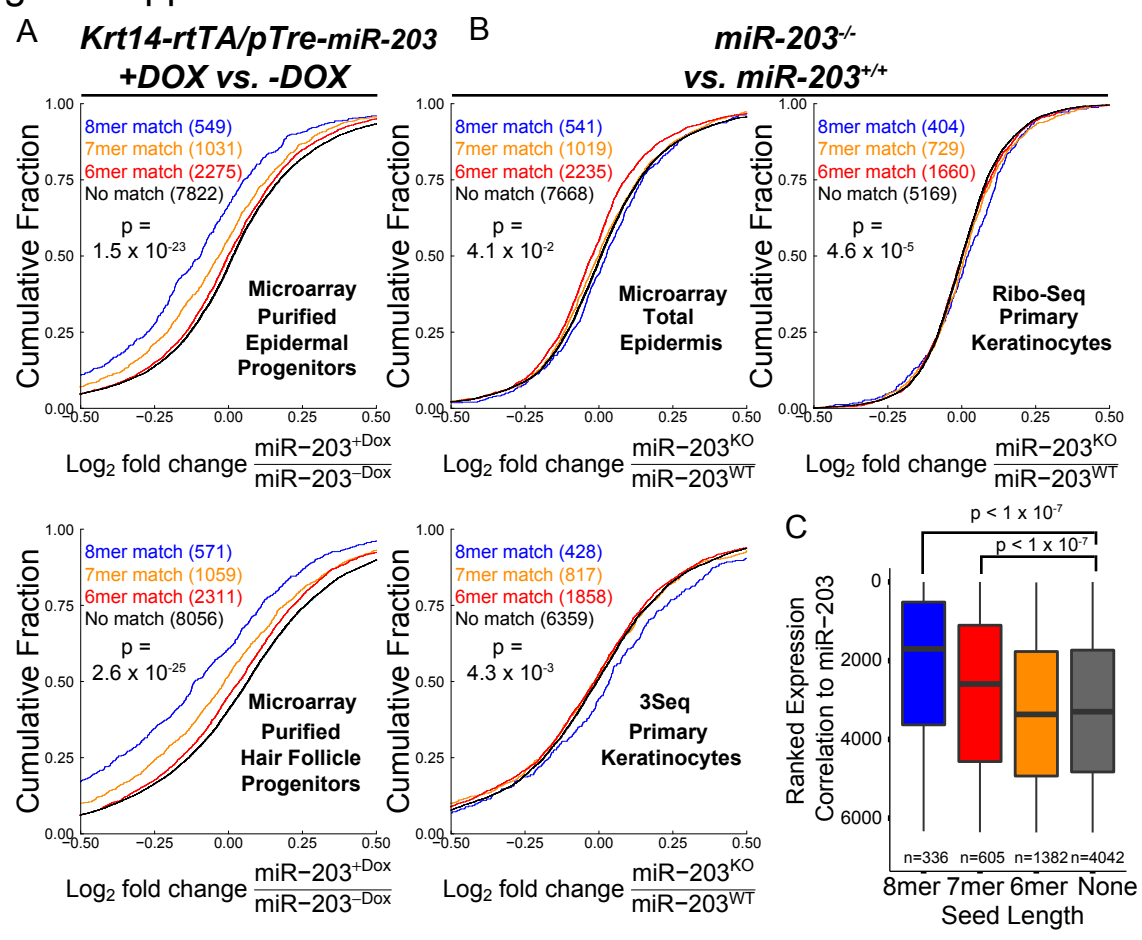

Supplement: supp [file elife-07004-supp-v1.zip]

Figure-3 Figure Supplement-2

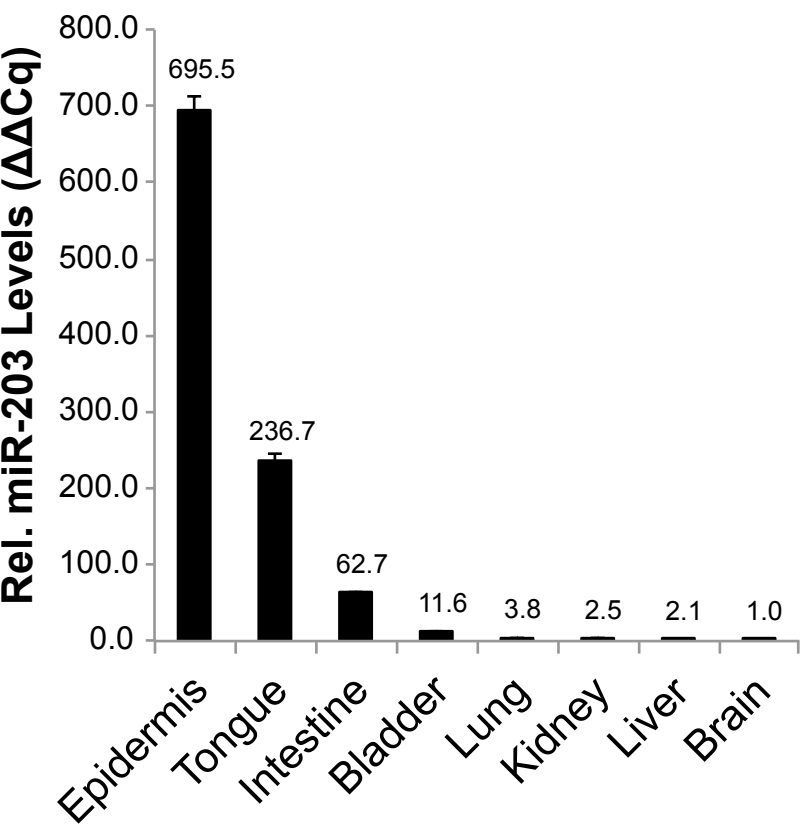

Supplement: supp [file elife-07004-supp-v1.zip]

Figure - 7 Figure Supplement - 2

A

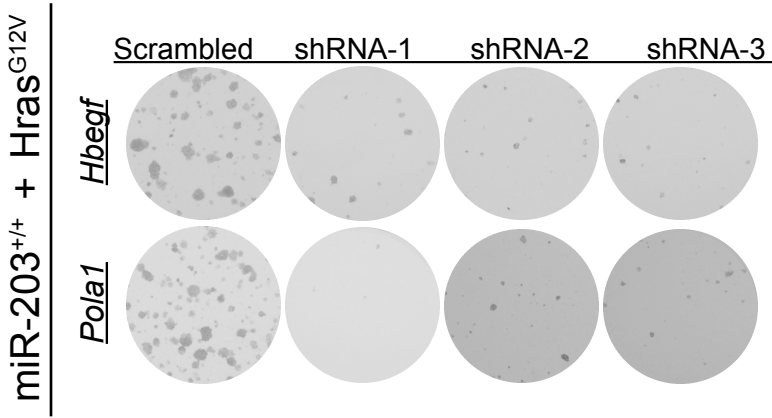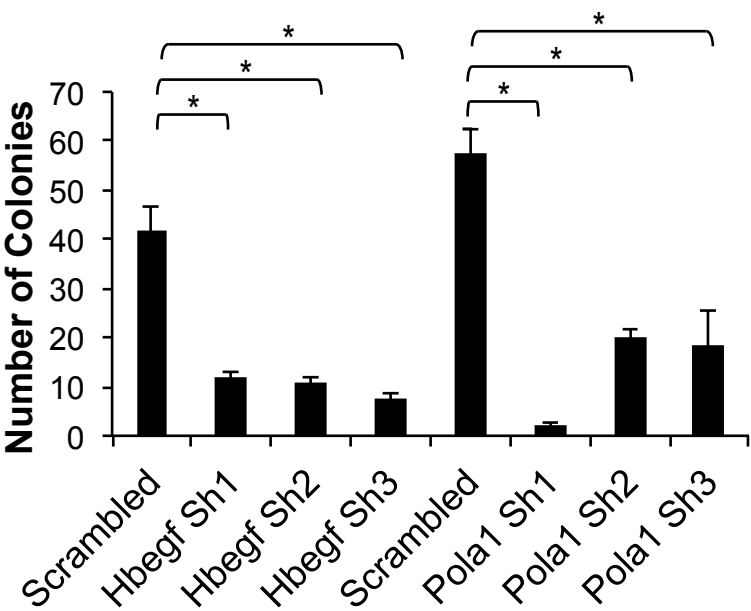

B

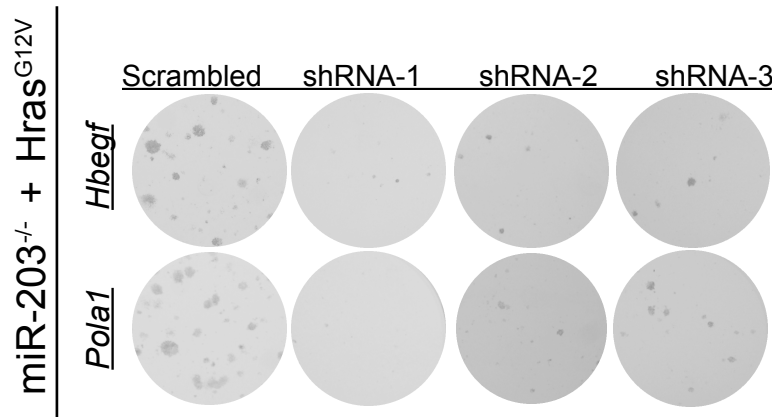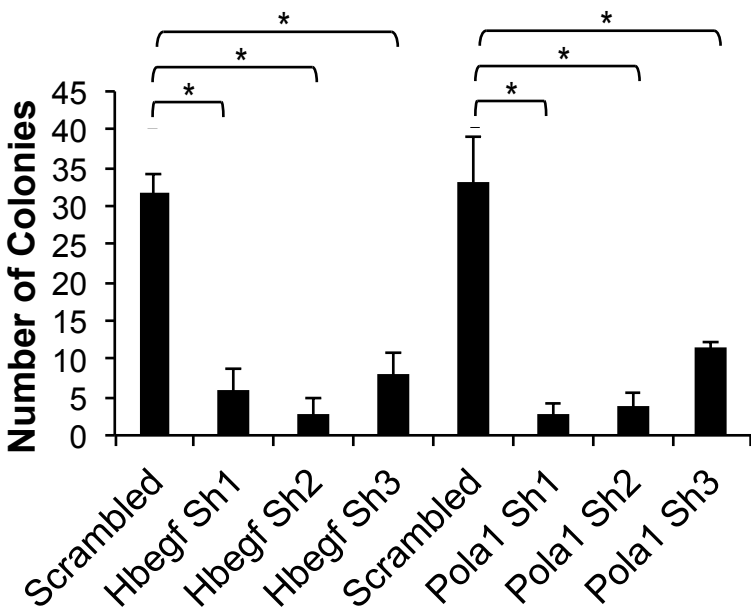

Supplement: supp [file elife-07004-supp-v1.zip]

Figure-3 Figure Supplement-1

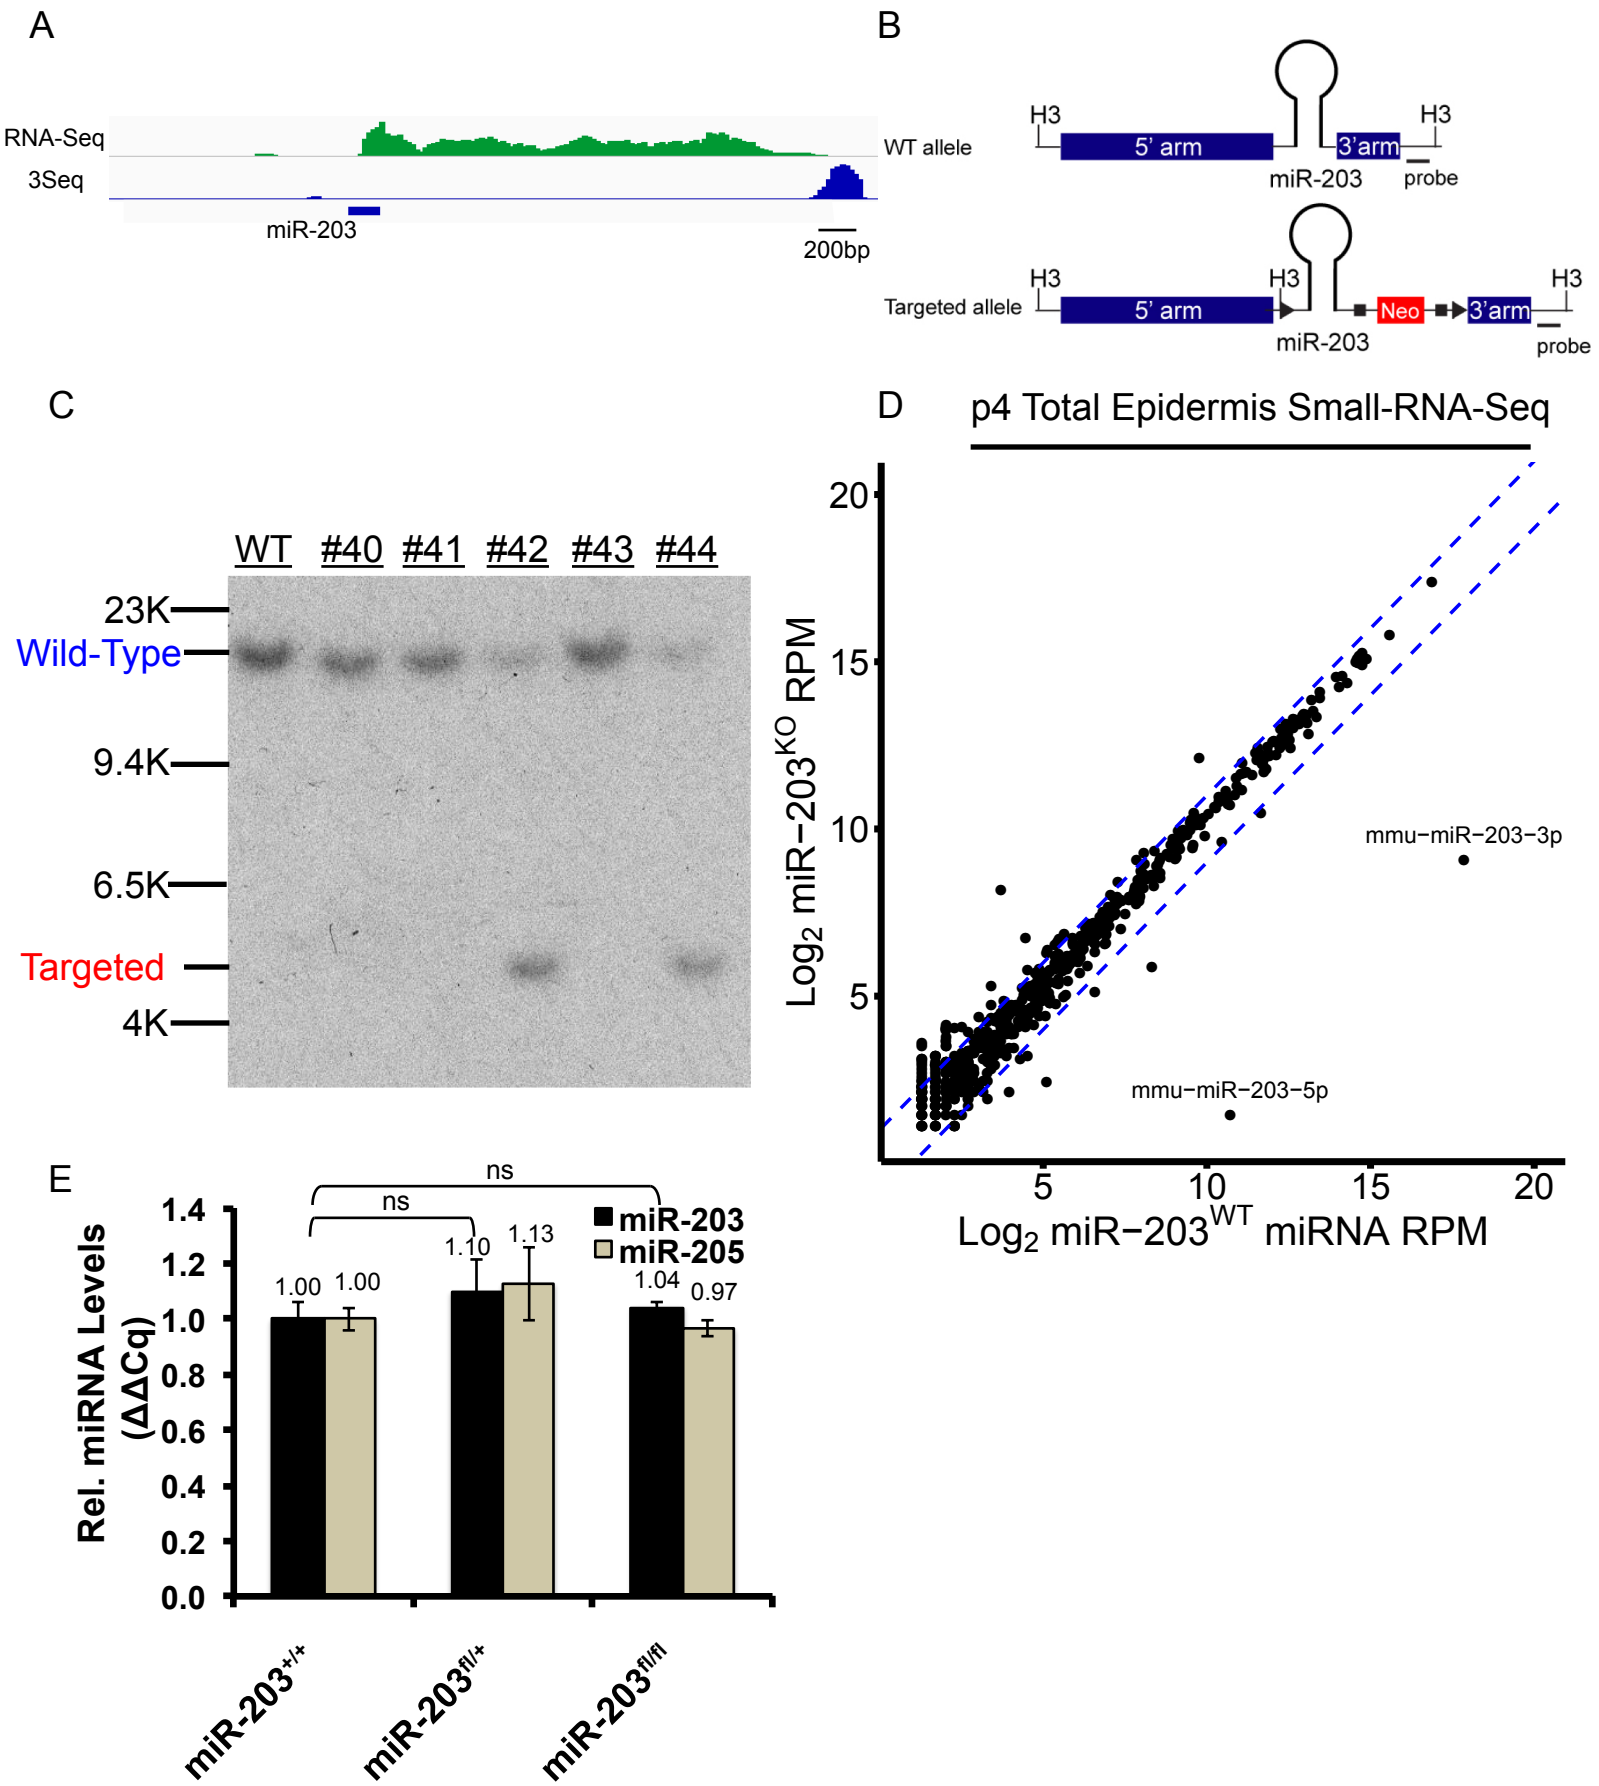

Supplement: supp [file elife-07004-supp-v1.zip]

Figure-6 Figure Supplement-4

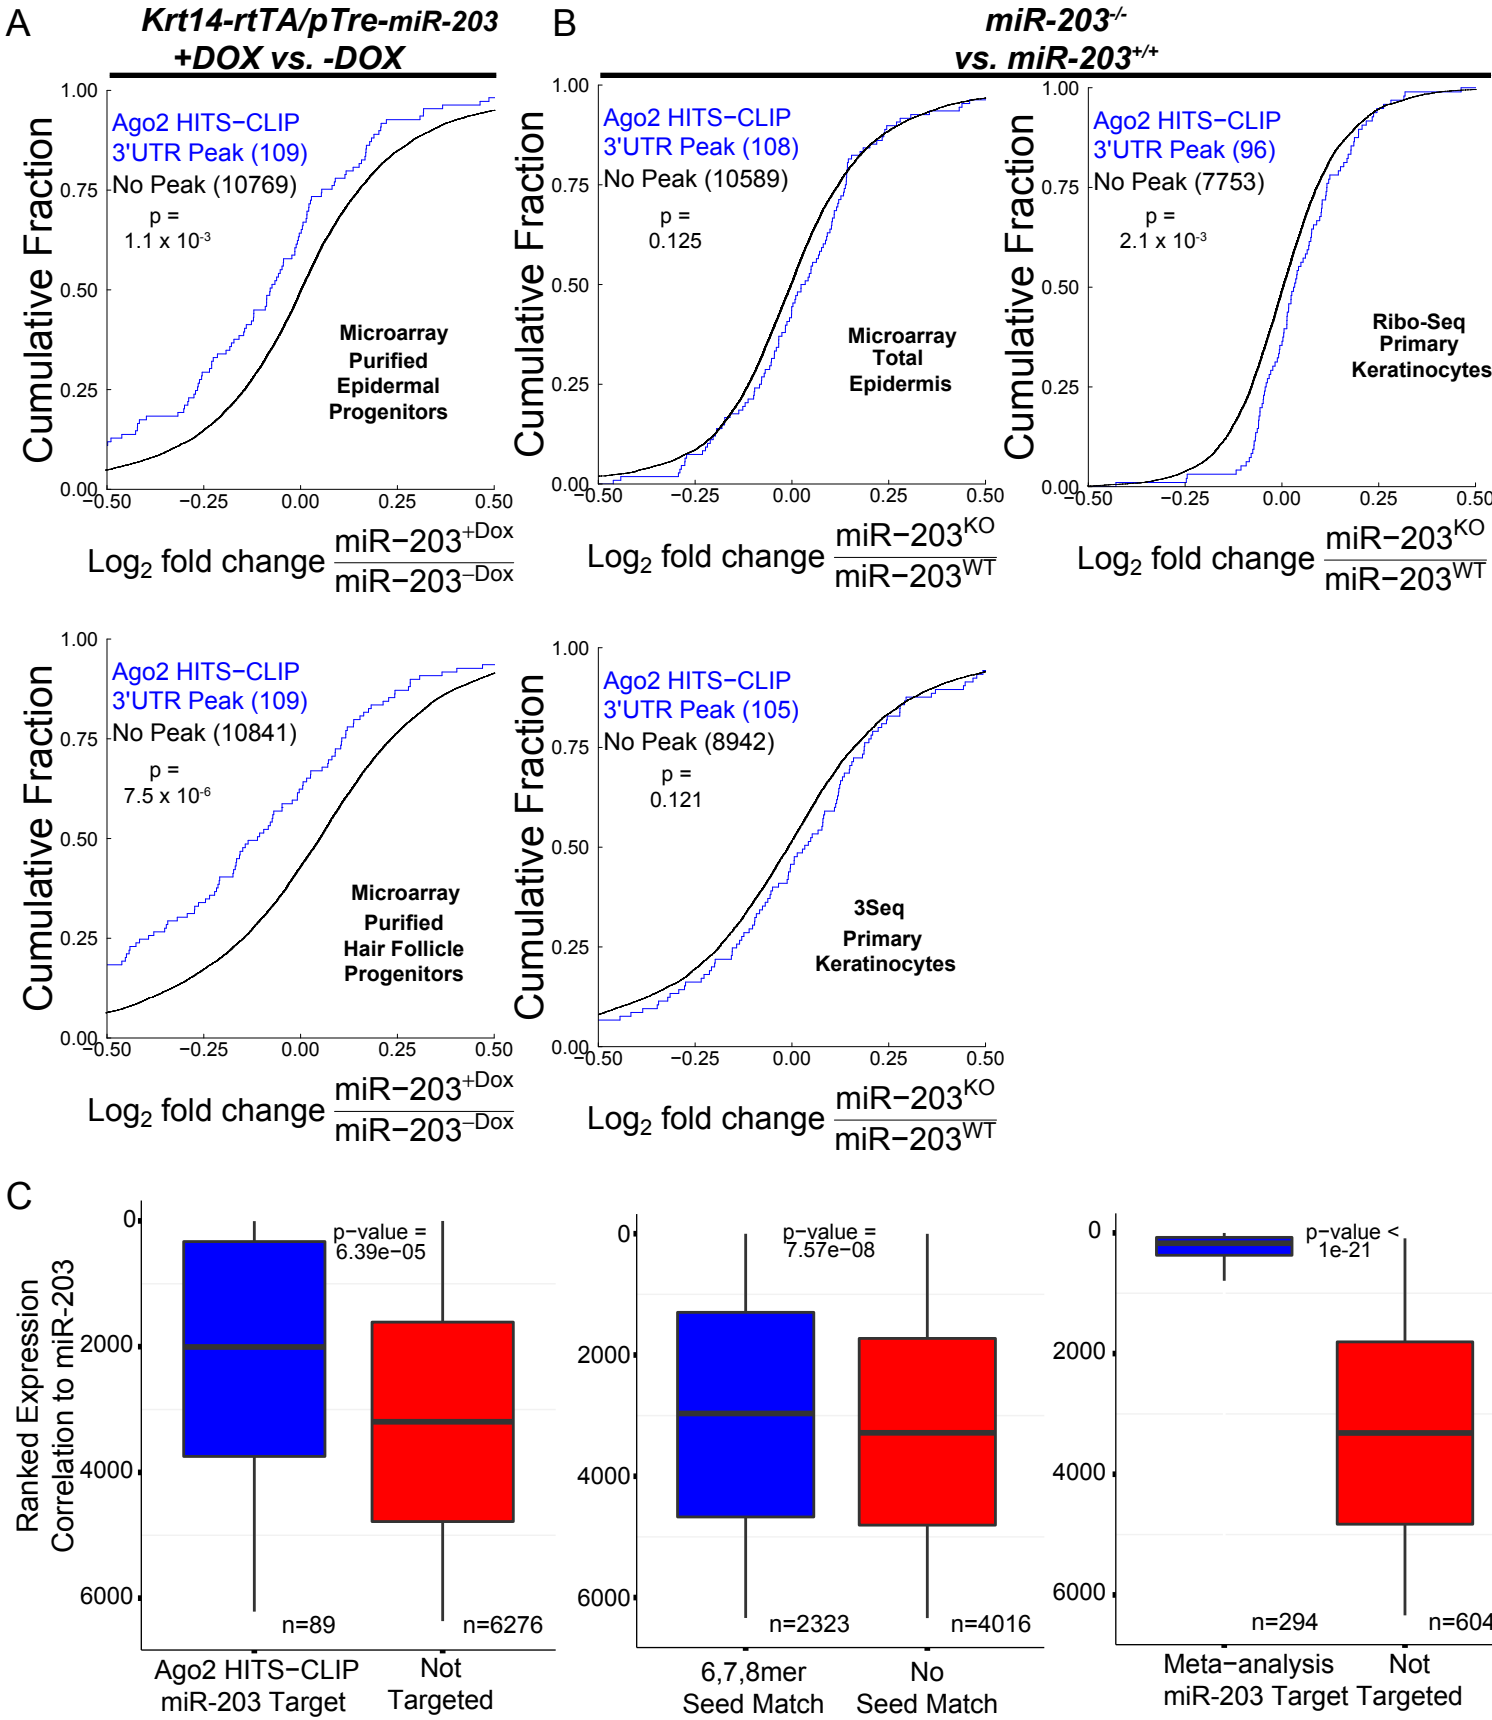

Supplement: supp [file elife-07004-supp-v1.zip]

Figure-6 Figure Supplement-5

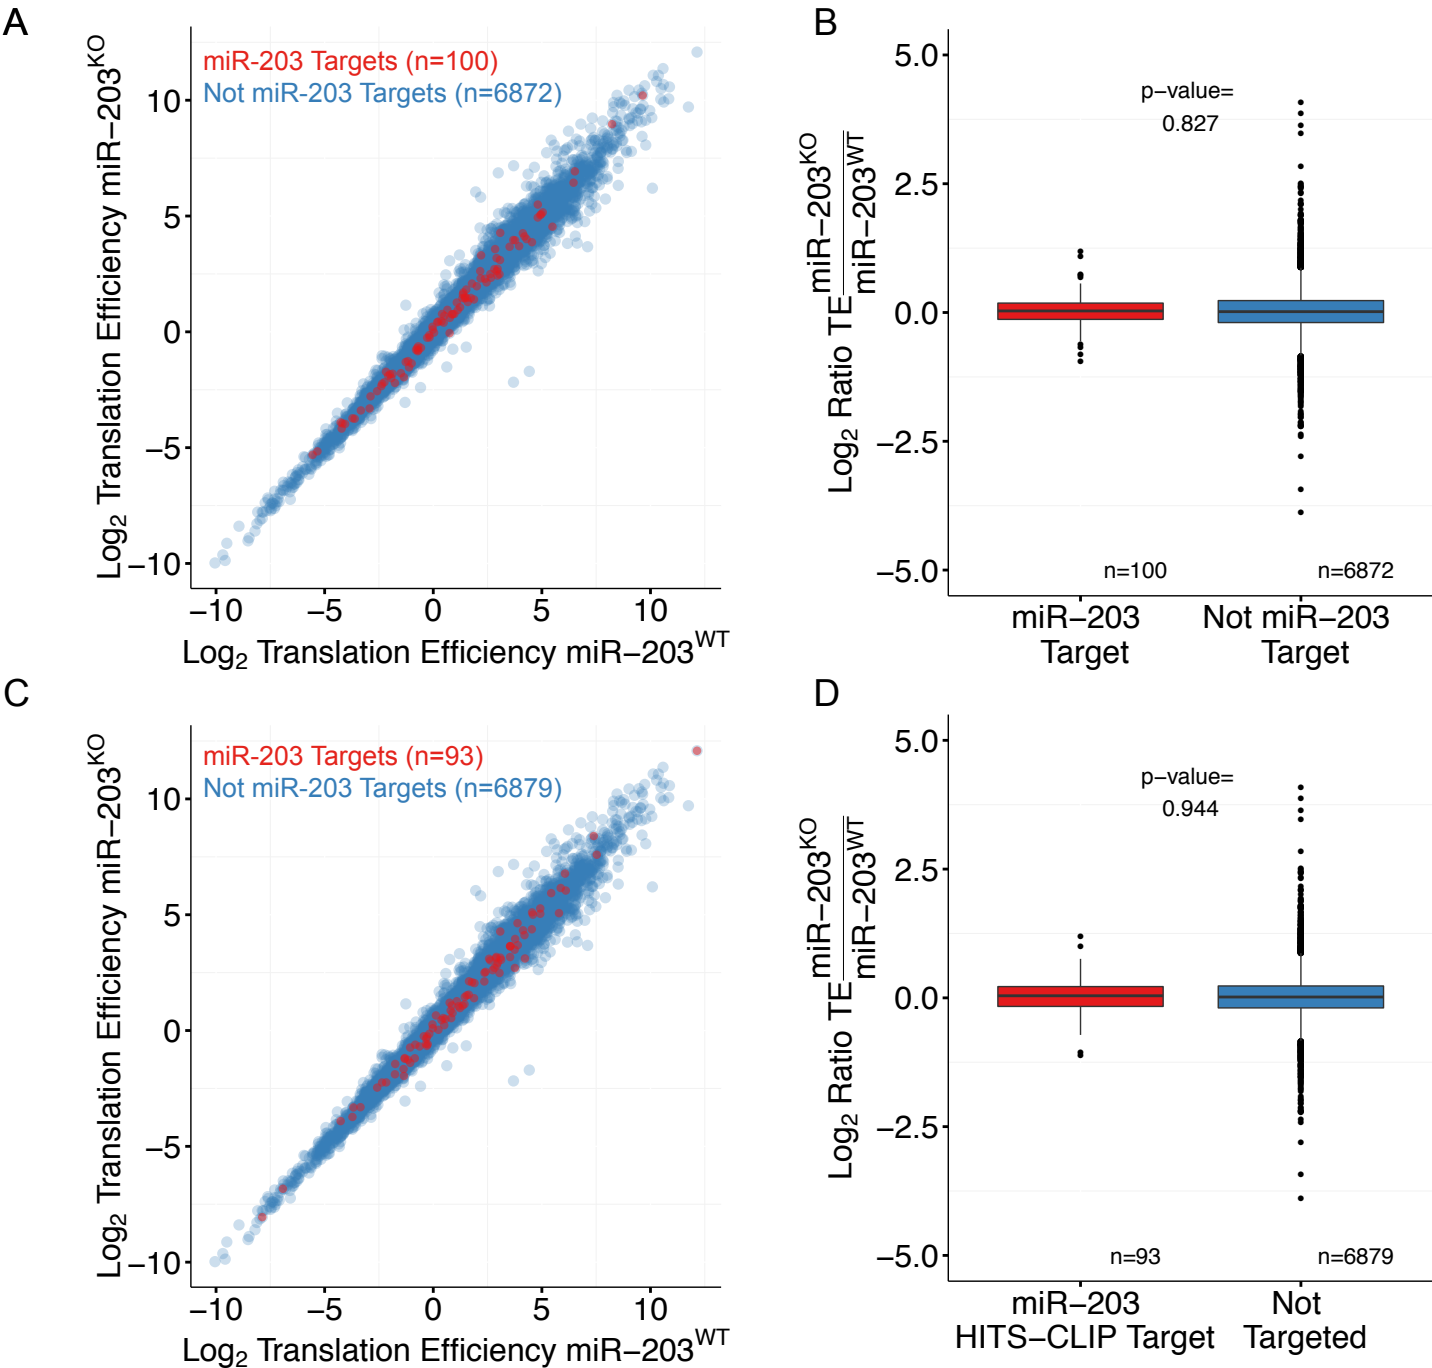

Supplement: supp [file elife-07004-supp-v1.zip]

Figure-6 Figure Supplement-2

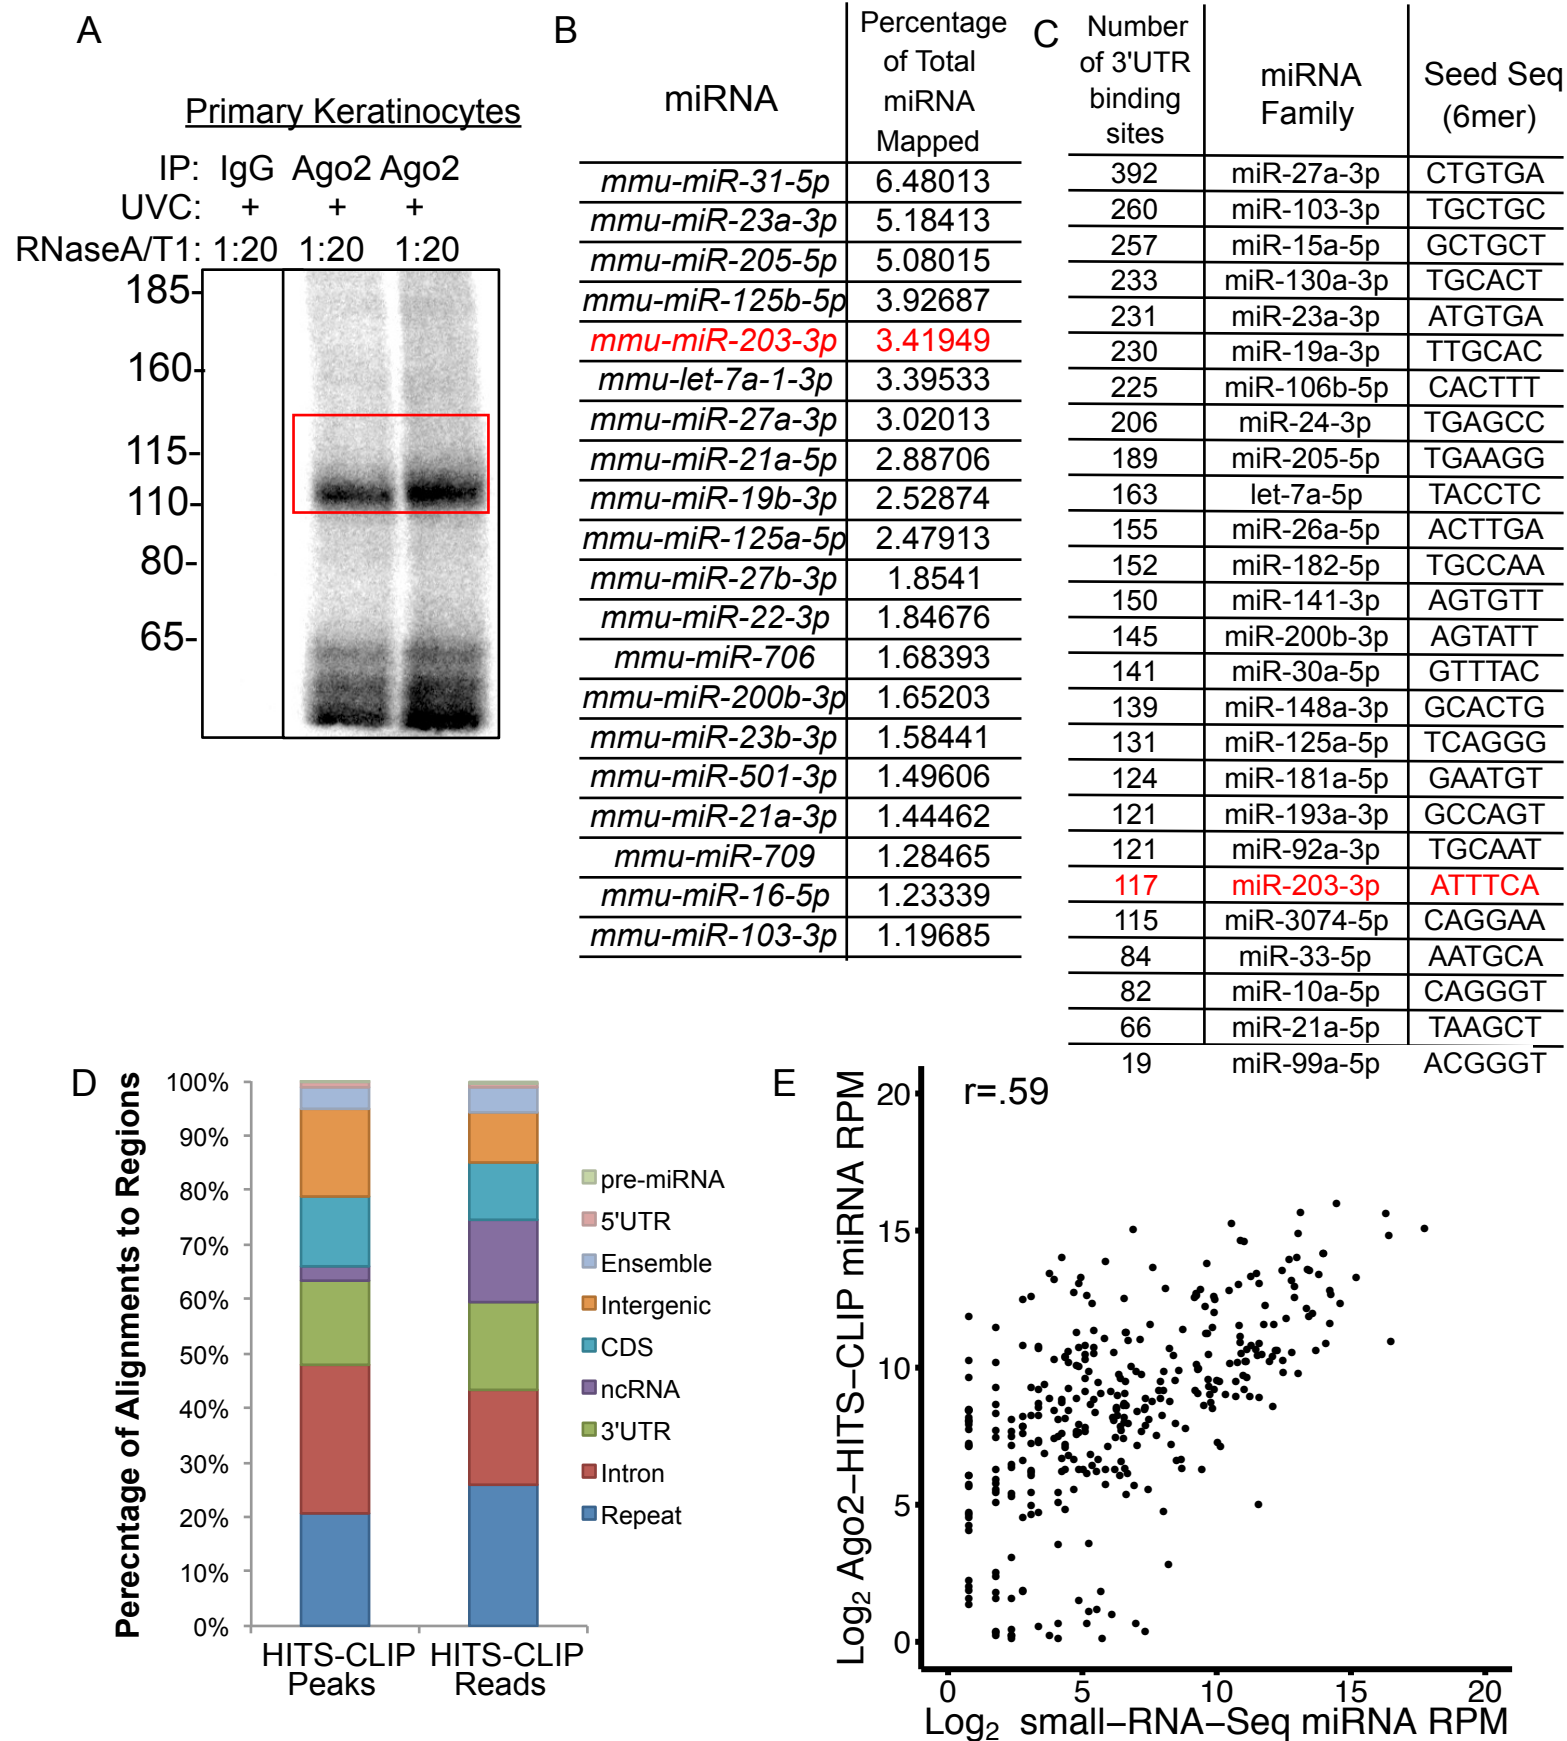

Supplement: supp [file elife-07004-supp-v1.zip]
